# Supplementary material
Source: PubMed Central journal article supplement (PMC11559660)
Supplement: NIHMS2032350-supplement-Supplemental_material.pdf [file NIHMS2032350-supplement-Supplemental_material.pdf]

## Supplementary Online Content

Metal Mixture and Serum Lipid Levels in Childhood: The Rhea Mother-Child Cohort in Greece

Gyeyoon Yim, Katerina Margetaki, Megan E. Romano, Maria Kippler, Marina Vafeiadi, Theano Roumeliotaki, Vicky Bempi, Shohreh F Farzan, Leda Chatzi, Caitlin G. Howe

### Table of contents:

Figure S1. Flow chart showing selection of the study population

Table S1. Reference values and obtained values of seven metals in two reference materials included in all analyses for quality control as well as the limit of detection (LOD) for each metal

Figure S2. Spearman correlations between blood metal pairs (n=291)

Table S2. Key characteristics of the Rhea cohort participants included and excluded from the analysis

Figure S3. Pearson correlation coefficients between serum lipid measures (n=291)

Figure S4. Joint associations of the metals with total cholesterol at 4 years of age estimated by BKMR (n=291)

Figure S5. Joint associations of the metals with high-density lipoprotein cholesterol at 4 years of age, estimated by BKMR (n=291)

Figure S6. Joint associations of the metals with triglycerides at 4 years of age, estimated by BKMR (n=291)

Table S3. Quantile g-computation estimates (psi and 95% confidence bounds) for the difference in each lipid measure at age 4 for a simultaneous decile increase in all metals (Co, Mn, Mo, Se, Cd, Hg, and Pb; n=291)

Table S4. Quantile g-computation weights for each metal in the mixture in relation to each lipid measure (n=291)

Figure S7. Joint associations of the metals with (A) total cholesterol, (B) low-density lipoprotein (LDL) cholesterol, (C) high-density lipoprotein (HDL) cholesterol, and (D) triglycerides at 4 years of age, estimated by quantile g-computation (n=291)

Table S5. Difference in lipid measure levels setting all metals (Co, Mn, Mo, Se, Cd, Hg, and Pb) to their 75th compared with 25th percentile concentrations and holding all other metals in the mixture at their median values, estimated by BKMR additionally adjusting for red meat consumption (n=291)

Table S6. Posterior inclusion probabilities (PIP) and effect estimates for each metal, holding all other metals in the mixture constant at their median values, in association with lipid measures at 4 years of age, estimated by BKMR additionally adjusting for red meat consumption (n=291)

Figure S8. Joint associations of the metals with total cholesterol at 4 years of age estimated by BKMR additionally adjusting for red meat consumption (n=291)

Figure S9. Joint associations of the metals with low-density lipoprotein cholesterol at 4 years of age estimated by BKMR additionally adjusting for red meat consumption (n=291)

Figure S10. Joint associations of the metals with high-density lipoprotein cholesterol at 4 years of age estimated by BKMR additionally adjusting for red meat consumption (n=291)

Figure S11. Joint associations of the metals with triglycerides at 4 years of age estimated by BKMR additionally adjusting for red meat consumption (n=291)

Table S7. Difference in lipid measure levels setting all metals (Co, Mn, Mo, Se, Cd, Hg, and Pb) to their 75<sup>th</sup> compared with 25<sup>th</sup> percentile concentrations and holding all other metals in the mixture at their median values, estimated by BKMR additionally adjusting for egg intake (n=291)

Table S8. Posterior inclusion probabilities (PIP) and effect estimates for each metal, holding all other metals in the mixture constant at their median values, in association with lipid measures at 4 years of age, estimated by BKMR additionally adjusting for egg intake (n=291)

Figure S12. Joint associations of the metals with total cholesterol at 4 years of age estimated by BKMR additionally adjusting for egg intake (n=291)

Figure S13. Joint associations of the metals with low-density lipoprotein cholesterol at 4 years of age estimated by BKMR additionally adjusting for egg intake (n=291)

Figure S14. Joint associations of the metals with high-density lipoprotein cholesterol at 4 years of age estimated by BKMR additionally adjusting for egg intake (n=291)

Figure S15. Joint associations of the metals with triglycerides at 4 years of age estimated by BKMR additionally adjusting for egg intake (n=291)

Table S9. Difference in lipid measure levels setting all metals (Co, Mn, Mo, Se, Cd, Hg, and Pb) to their 75<sup>th</sup> compared with 25<sup>th</sup> percentile concentrations and holding all other metals in the mixture at their median values, estimated by BKMR additionally adjusting for dairy intake (n=291)

Table S10. Posterior inclusion probabilities (PIP) and effect estimates for each metal, holding all other metals in the mixture constant at their median values, in association with lipid measures at 4 years of age, estimated by BKMR additionally adjusting for dairy intake (n=291)

Figure S16. Joint associations of the metals with total cholesterol at 4 years of age estimated by BKMR additionally adjusting for dairy intake (n=291)

Figure S17. Joint associations of the metals with low-density lipoprotein cholesterol at 4 years of age estimated by BKMR additionally adjusting for dairy intake (n=291)

Figure S18. Joint associations of the metals with high-density lipoprotein cholesterol at 4 years of age estimated by BKMR additionally adjusting for dairy intake (n=291)

Figure S19. Joint associations of the metals with triglycerides at 4 years of age estimated by BKMR additionally adjusting for dairy intake (n=291)

Table S11. Difference in lipid measure levels setting all metals (Co, Mn, Mo, Se, Cd, Hg, and Pb) to their 75<sup>th</sup> compared with 25<sup>th</sup> percentile concentrations and holding all other metals in the mixture at their median values, estimated by BKMR additionally adjusting for supplement use (n=291)

Table S12. Posterior inclusion probabilities (PIP) and effect estimates for each metal, holding all other metals in the mixture constant at their median values, in association with lipid measures at 4 years of age, estimated by BKMR additionally adjusting for supplement use (n=291)

Figure S20. Joint associations of the metals with total cholesterol at 4 years of age estimated by BKMR additionally adjusting for supplement use (n=291)

Figure S21. Joint associations of the metals with low-density lipoprotein cholesterol at 4 years of age estimated by BKMR additionally adjusting for supplement use (n=291)

Figure S22. Joint associations of the metals with high-density lipoprotein cholesterol at 4 years of age estimated by BKMR additionally adjusting for supplement use (n=291)

Figure S23. Joint associations of the metals with triglycerides at 4 years of age estimated by BKMR additionally adjusting for supplement use (n=291)

Table S13. Difference in lipid measure levels setting all metals (Co, Mn, Mo, Se, Cd, Hg, and Pb) to their 75<sup>th</sup> compared with 25<sup>th</sup> percentile concentrations stratified by sex, estimated by BKMR

Table S14. Posterior inclusion probabilities and effect estimates for each metal within the mixture in association with lipid measures stratified by sex, estimated by BKMR

Figure S24. Joint associations of the metals with total cholesterol at 4 years of age among boys, estimated by BKMR (n=160)

Figure S25. Joint associations of the metals with low-density lipoprotein cholesterol at 4 years of age among boys, estimated by BKMR (n=160)

Figure S26. Joint associations of the metals with high-density lipoprotein cholesterol at 4 years of age among boys, estimated by BKMR (n=160)

Figure S27. Joint associations of the metals with triglycerides at 4 years of age among boys, estimated by BKMR (n=160)

Figure S28. Joint associations of the metals with total cholesterol at 4 years of age among girls, estimated by BKMR (n=131)

Figure S29. Joint associations of the metals with low-density lipoprotein cholesterol at 4 years of age among girls, estimated by BKMR (n=131)

Figure S30. Joint associations of the metals with high-density lipoprotein cholesterol at 4 years of age among girls, estimated by BKMR (n=131)

Figure S31. Joint associations of the metals with triglycerides at 4 years of age among girls, estimated by BKMR (n=131)

Table S15. Difference in lipid measure levels setting all metals (Co, Mn, Mo, Se, Cd, Hg, and Pb) to their 75<sup>th</sup> compared with 25<sup>th</sup> percentile concentrations and holding all other metals in the mixture at their median values stratified by environmental tobacco smoke (ETS) exposure, estimated by BKMR

Table S16. Posterior inclusion probabilities (PIP) and effect estimates for each metal, holding all other metals in the mixture constant at their median values, in association with lipid measures at 4 years of age, stratified by environmental tobacco smoke (ETS) exposure, estimated by BKMR

Figure S32. Joint associations of the metals with total cholesterol at 4 years of age among children exposed to secondhand smoke at 4 years of age, estimated by BKMR (n=138)

Figure S33. Joint associations of the metals with low-density lipoprotein cholesterol at 4 years of age among children exposed to secondhand smoke at 4 years of age, estimated by BKMR (n=138)

Figure S34. Joint associations of the metals with high-density lipoprotein cholesterol at 4 years of age among children exposed to secondhand smoke at 4 years of age, estimated by BKMR (n=138)

Figure S35. Joint associations of the metals with triglycerides at 4 years of age among children exposed to secondhand smoke at 4 years of age, estimated by BKMR (n=138)

Figure S36. Joint associations of the metals with total cholesterol at 4 years of age among children not exposed to secondhand smoke at 4 years of age, estimated by BKMR (n=153)

Figure S37. Joint associations of the metals with low-density lipoprotein cholesterol at 4 years of age among children not exposed to secondhand smoke at 4 years of age, estimated by BKMR (n=153)

Figure S38. Joint associations of the metals with high-density lipoprotein cholesterol at 4 years of age among children not exposed to secondhand smoke at 4 years of age, estimated by BKMR (n=153)

Figure S39. Joint associations of the metals with triglycerides at 4 years of age among children not exposed to secondhand smoke at 4 years of age, estimated by BKMR (n=153)

Figure S1. Flow chart showing selection of the study population

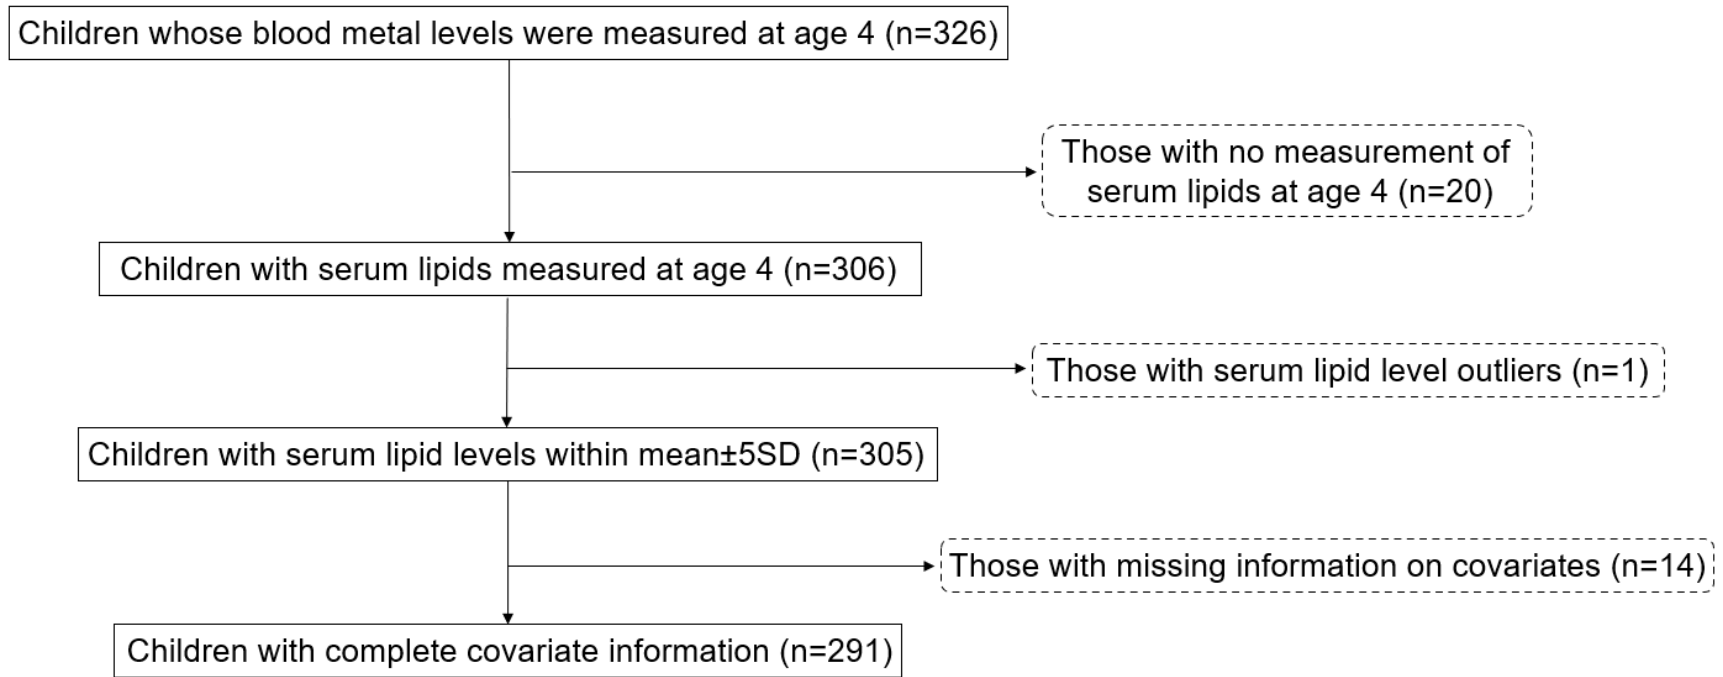

Table S1. References values and obtained values of seven metals in two reference materials included in all analyses for quality control as well as the limit of detection (LOD) for each metal (calculated as three times the SD of the blank concentrations)

| Metal/trace element | Seronorm™ Trace Elements Whole blood 1406263 (n=20) |                | Seronorm™ Trace Elements blood L-2 whole blood 1406264 (n=21) |                | LOD   |
|---------------------|-----------------------------------------------------|----------------|---------------------------------------------------------------|----------------|-------|
|                     | Reference value                                     | Obtained value | Reference value                                               | Obtained value |       |
| Manganese (µg/L)    | 18.4±3.7                                            | 19.6±0.6       | 31.4±6.3                                                      | 33.2±2.2       | 0.1   |
| Cobalt (µg/L)       | 0.20±0.08                                           | 0.21±0.03      | 5.18±1.04                                                     | 5.18±0.28      | 0.01  |
| Selenium (µg/L)     | 60±12                                               | 63.4±3.2       | 161±32                                                        | 170±3.9        | 0.03  |
| Molybdenum (µg/L)   | 0.51±0.1                                            | 0.56±0.11      | 5.31±1.07                                                     | 5.00±0.79      | 0.03  |
| Cadmium (µg/L)      | 0.28±0.11                                           | 0.30±0.04      | 5.01±1.01                                                     | 5.05±0.42      | 0.002 |
| Mercury (µg/L)      | 1.48±0.3                                            | 1.49±0.18      | 17.0±3.4                                                      | 17.2±0.99      | 0.02  |
| Lead (µg/L)         | 9.9±2.0                                             | 10.1±1.4       | 337±68                                                        | 287±23         | 0.3   |

Figure S2. Spearman correlations between blood metal pairs (n=291)

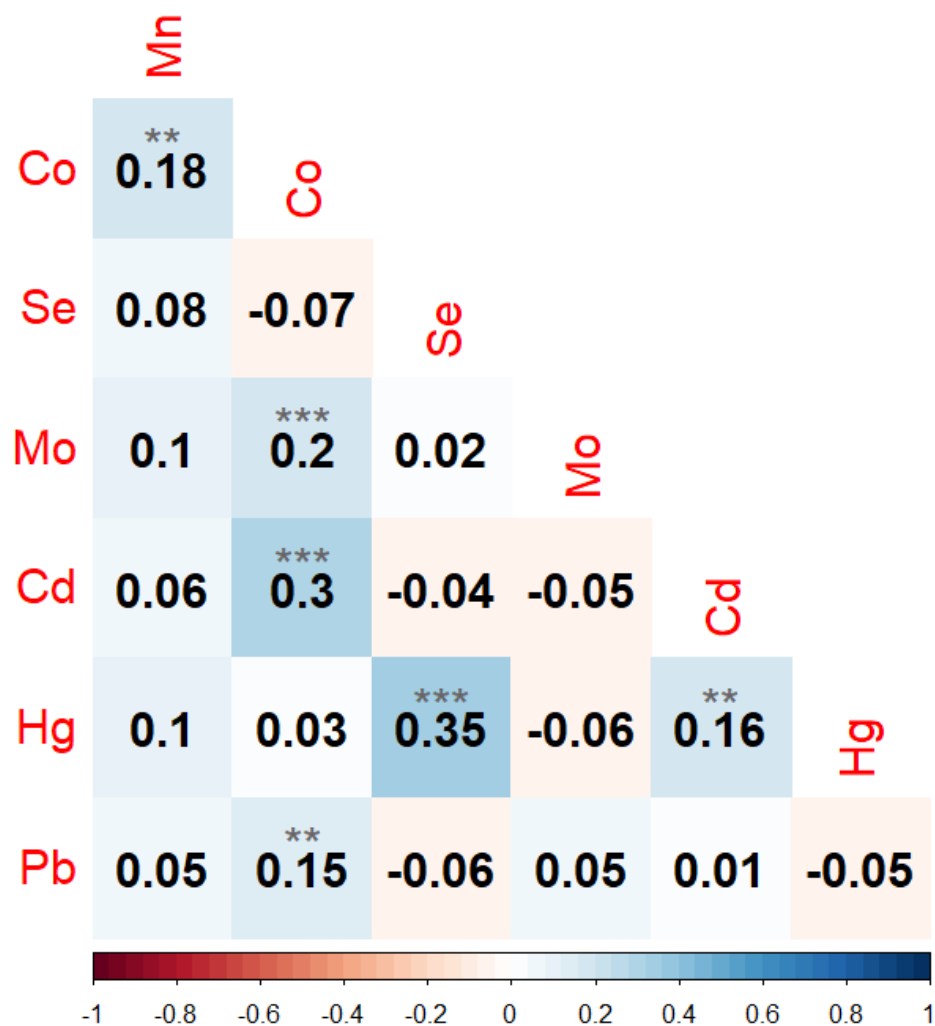

Positive correlations are marked by blue shades, whereas negative correlations are marked by red shades as shown in the key. The correlations with an asterisk indicate a p-value < 0.05, two asterisks a p-value < 0.01, and three asterisks a p-value < 0.001. Abbreviations: Mn, manganese; Co, cobalt; Se, selenium; Mo, molybdenum; Cd, cadmium; Hg, mercury; Pb, lead.

Table S2. Key characteristics of the Rhea cohort participants included and excluded from the analysis

| <b>Characteristic</b>                        | <b>Original population<br/>(N=1,363)</b> | <b>Included in the<br/>analysis<br/>(n=291)</b> | <b>Excluded from<br/>the analysis<br/>(n=1,072)</b> | <b>P</b> |
|----------------------------------------------|------------------------------------------|-------------------------------------------------|-----------------------------------------------------|----------|
| <i>Maternal characteristics</i>              |                                          |                                                 |                                                     |          |
| Maternal age at delivery (years)             | 29.3±5.1                                 | 30.1±5.1                                        | 29.1±5.0                                            | 0.002    |
| Missing                                      | 19 (1.4)                                 | 0 (0.0)                                         | 19 (1.8)                                            |          |
| Maternal educational attainment              |                                          |                                                 |                                                     | 0.001    |
| < 9 years                                    | 278 (20.4)                               | 39 (13.4)                                       | 239 (22.3)                                          |          |
| 9-12 years                                   | 661 (48.5)                               | 158 (54.3)                                      | 503 (46.9)                                          |          |
| > 12 years                                   | 370 (27.1)                               | 94 (32.3)                                       | 276 (25.7)                                          |          |
| Missing                                      | 54 (4.0)                                 | 0 (0.0)                                         | 54 (5.0)                                            |          |
| Parity                                       |                                          |                                                 |                                                     | 0.788    |
| Nulliparous                                  | 561 (41.2)                               | 123 (42.3)                                      | 438 (40.9)                                          |          |
| Parous                                       | 745 (54.7)                               | 168 (57.7)                                      | 577 (53.8)                                          |          |
| Missing                                      | 57 (4.2)                                 | 0 (0.0)                                         | 57 (5.3)                                            |          |
| Smoking during pregnancy                     |                                          |                                                 |                                                     | 0.407    |
| None                                         | 807 (59.2)                               | 189 (64.9)                                      | 618 (57.6)                                          |          |
| During early pregnancy only                  | 165 (12.1)                               | 31 (10.7)                                       | 134 (12.5)                                          |          |
| Throughout pregnancy                         | 236 (17.3)                               | 56 (19.2)                                       | 180 (16.8)                                          |          |
| Missing                                      | 155 (11.4)                               | 15 (5.2)                                        | 140 (13.1)                                          |          |
| <i>Child characteristics</i>                 |                                          |                                                 |                                                     |          |
| Sex                                          |                                          |                                                 |                                                     | 0.118    |
| Male                                         | 694 (50.9)                               | 160 (55.0)                                      | 534 (49.8)                                          |          |
| Female                                       | 669 (49.1)                               | 131 (45.0)                                      | 538 (50.2)                                          |          |
| Gestational age at birth (weeks)             | 38.2±1.6                                 | 38.2±1.6                                        | 38.2±1.6                                            | 0.659    |
| Missing                                      | 20 (1.5)                                 | 1 (0.3)                                         | 19 (1.8)                                            |          |
| Secondhand tobacco smoke exposure at 4 years |                                          |                                                 |                                                     | 0.469    |
| Yes                                          | 427 (31.3)                               | 153 (52.6)                                      | 274 (25.6)                                          |          |
| No                                           | 360 (26.4)                               | 138 (47.4)                                      | 222 (20.7)                                          |          |
| Missing                                      | 576 (42.3)                               | 0 (0.0)                                         | 576 (53.7)                                          |          |
| Regular fish/seafood intake at 4 years       |                                          |                                                 |                                                     | 0.029    |
| Consumed fish/seafood ≥ 2 times per week     | 861 (63.2)                               | 240 (82.5)                                      | 621 (57.9)                                          |          |
| Consumed fish/seafood < 2 times per week     | 138 (10.1)                               | 51 (17.5)                                       | 87 (8.1)                                            |          |
| Missing                                      | 364 (26.7)                               | 0 (0.0)                                         | 364 (34.0)                                          |          |
| Red meat consumption (times per week)        | 2.5 ±1.3                                 | 2.5±1.2                                         | 2.5 ±1.4                                            | 0.644    |
| Missing                                      | 989 (72.6)                               | 11 (3.8)                                        | 709 (66.1)                                          |          |
| Egg intake (times per week)                  | 2.3 (1.8)                                | 2.4±1.8                                         | 2.3 (1.8)                                           | 0.784    |
| Missing                                      | 988 (72.5)                               | 11 (3.8)                                        | 708 (66.0)                                          |          |



|                                  |            |            |            |       |
|----------------------------------|------------|------------|------------|-------|
| Dairy intake (times per week)    | 27.2 ±11.2 | 27.6±12.1  | 27.1 ±10.8 | 0.503 |
| Missing                          | 989 (72.6) | 11 (3.8)   | 709 (66.1) |       |
| Supplement use                   | 54 (4.0)   | 20 (6.9)   | 34 (3.2)   | 0.151 |
| Missing                          | 379 (27.8) | 11 (3.8)   | 368 (34.3) |       |
| Total cholesterol (mg/dL)        | 156.8±28.5 | 157.0±26.7 | 156.7±29.8 | 0.902 |
| Missing                          | 674 (49.4) | 0 (0.0)    | 674 (62.9) |       |
| Low-density lipoprotein (mg/dL)  | 93.2±24.6  | 93.5±23.3  | 93.1±25.4  | 0.848 |
| Missing                          | 674(49.4)  | 0 (0.0)    | 674 (62.9) |       |
| High-density lipoprotein (mg/dL) | 49.4±11.3  | 49.3±11.4  | 49.5±11.2  | 0.843 |
| Missing                          | 674(49.4)  | 0 (0.0)    | 674 (62.9) |       |
| Triglycerides (mg/dL)            | 70.9±27.7  | 71.1±29.4  | 70.8±26.4  | 0.889 |
| Missing                          | 674(49.4)  | 0 (0.0)    | 674 (62.9) |       |

Mean ± SD for continuous variables and N (%) for categorical variables.

Figure S3. Pearson correlation coefficients between serum lipid measures (n=291)

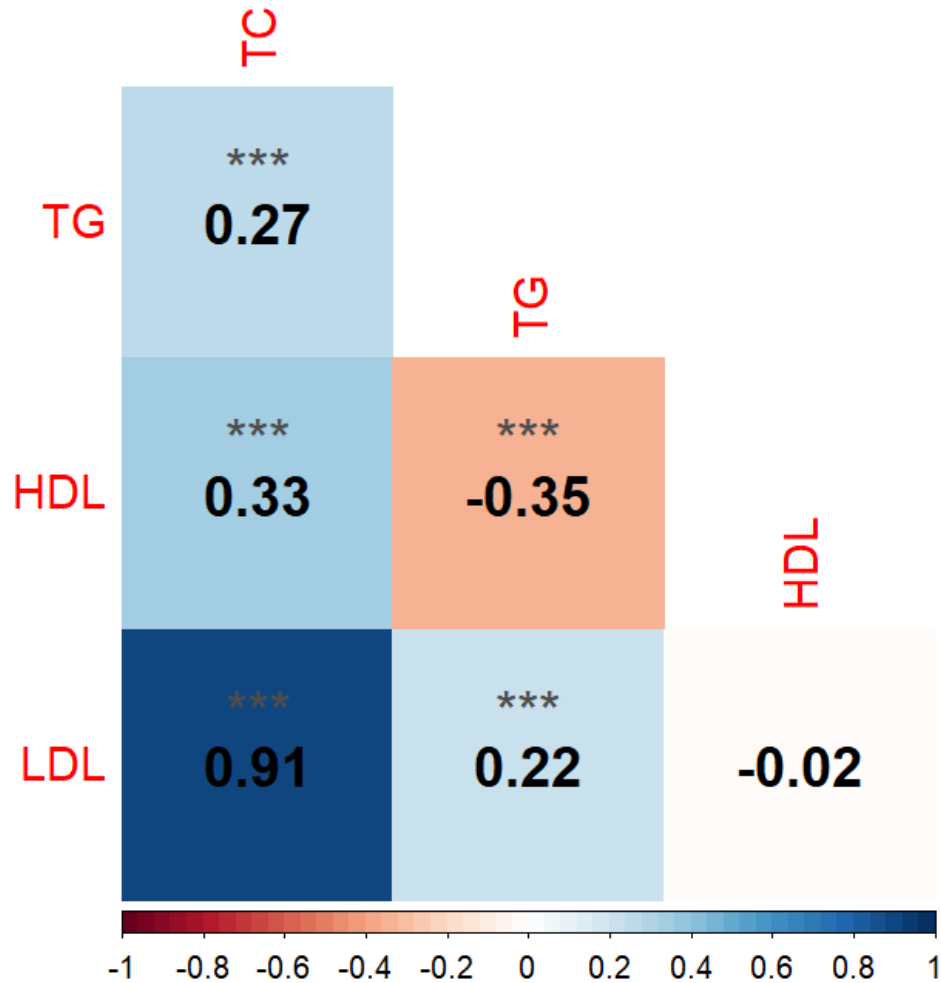

Positive correlations are marked by blue shades, whereas negative correlations are marked by red shades as shown in the key. The correlations with an asterisk indicate a p-value < 0.05, two asterisks a p-value < 0.01, and three asterisks a p-value < 0.001. Abbreviations: HDL, high-density lipoprotein; LDL, low-density lipoprotein; TC, total cholesterol; TG, triglycerides.

Figure S4. Joint associations of the metals with total cholesterol at 4 years of age estimated by BKMR (n=291)

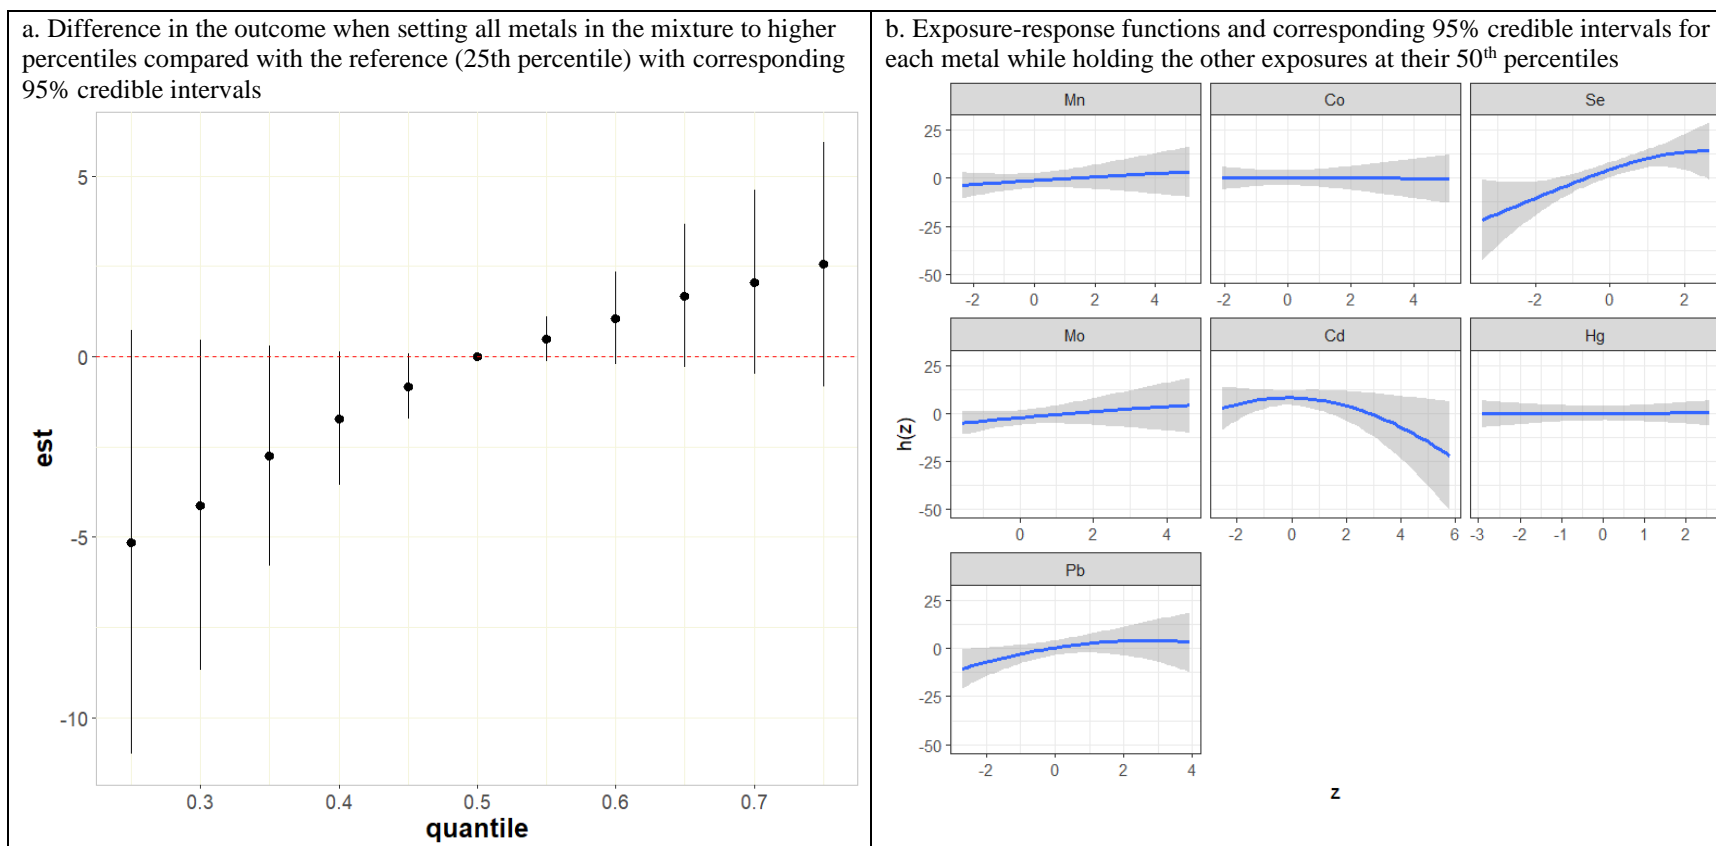

c. Bivariate exposure-response function of each metal exposure (column) with the second exposure (row) fixed at its 10<sup>th</sup>, 50<sup>th</sup>, and 90<sup>th</sup> percentiles, holding the other metal exposures at their 50<sup>th</sup> percentiles

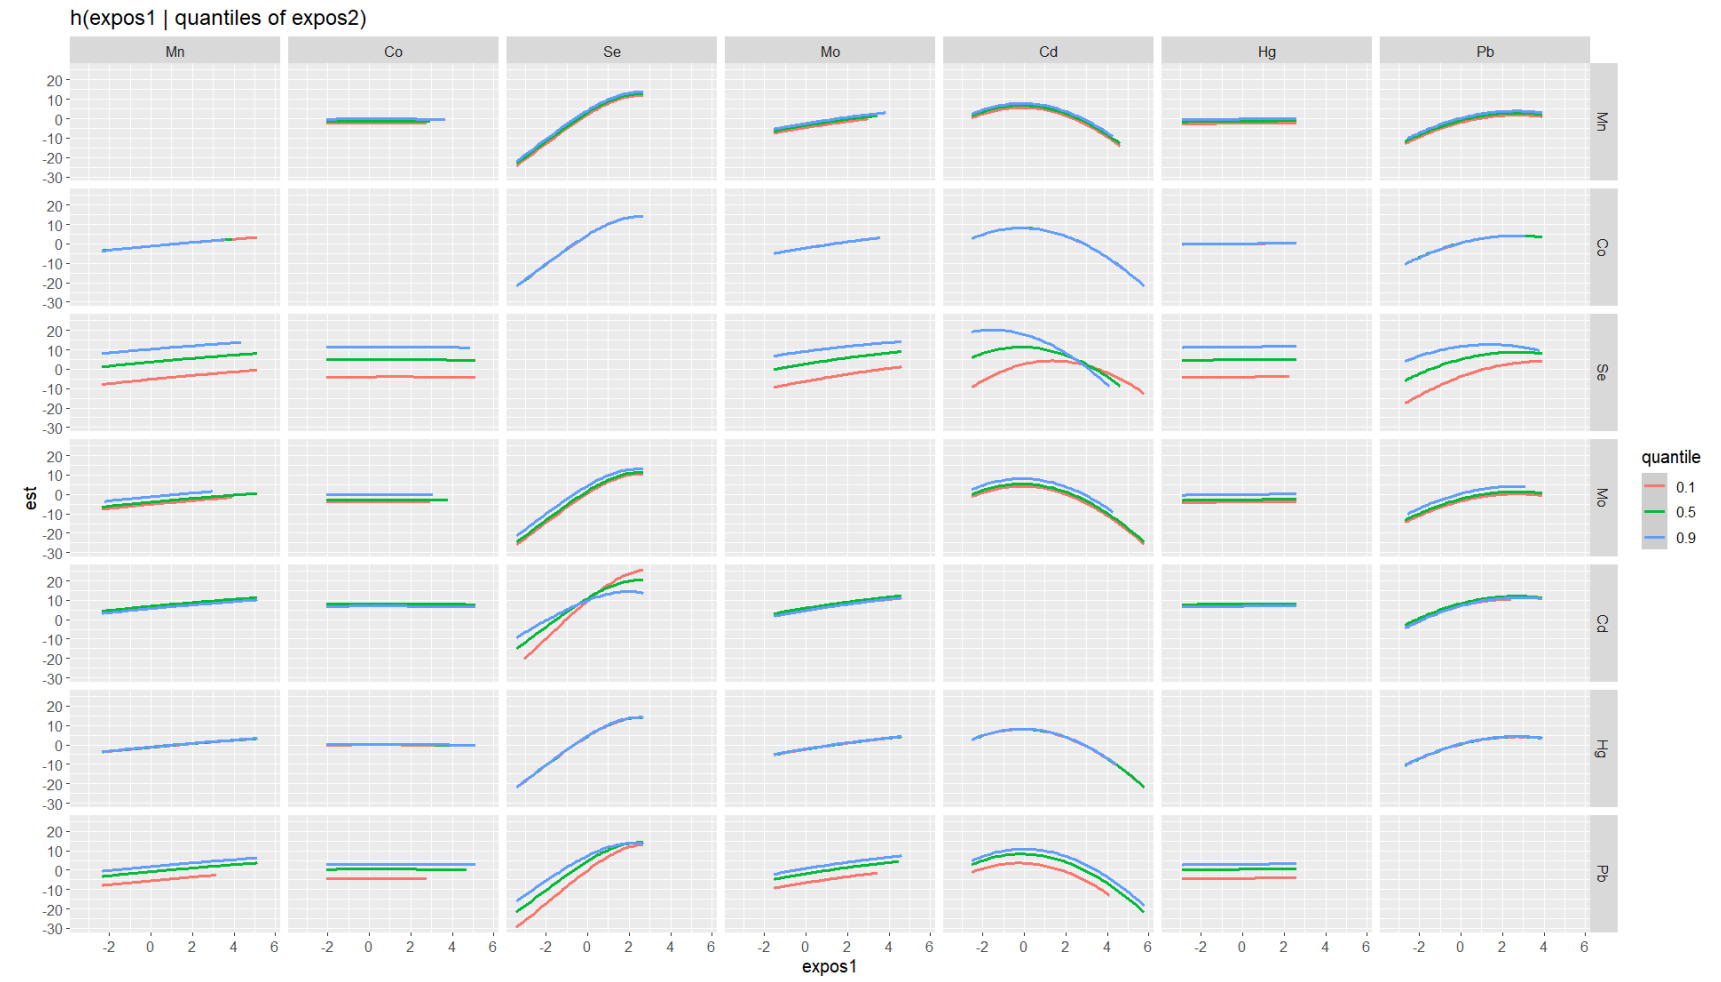

Abbreviations: Mn, manganese; Co, cobalt; Se, selenium; Mo, molybdenum; Cd, cadmium; Hg, mercury; Pb, lead. All models were adjusted for maternal education, child sex, child secondhand smoke exposure at 4 years of age, and child fish/seafood intake at 4 years of age.

Figure S5. Joint associations of the metals with high-density lipoprotein cholesterol at 4 years of age, estimated by BKMR (n=291)

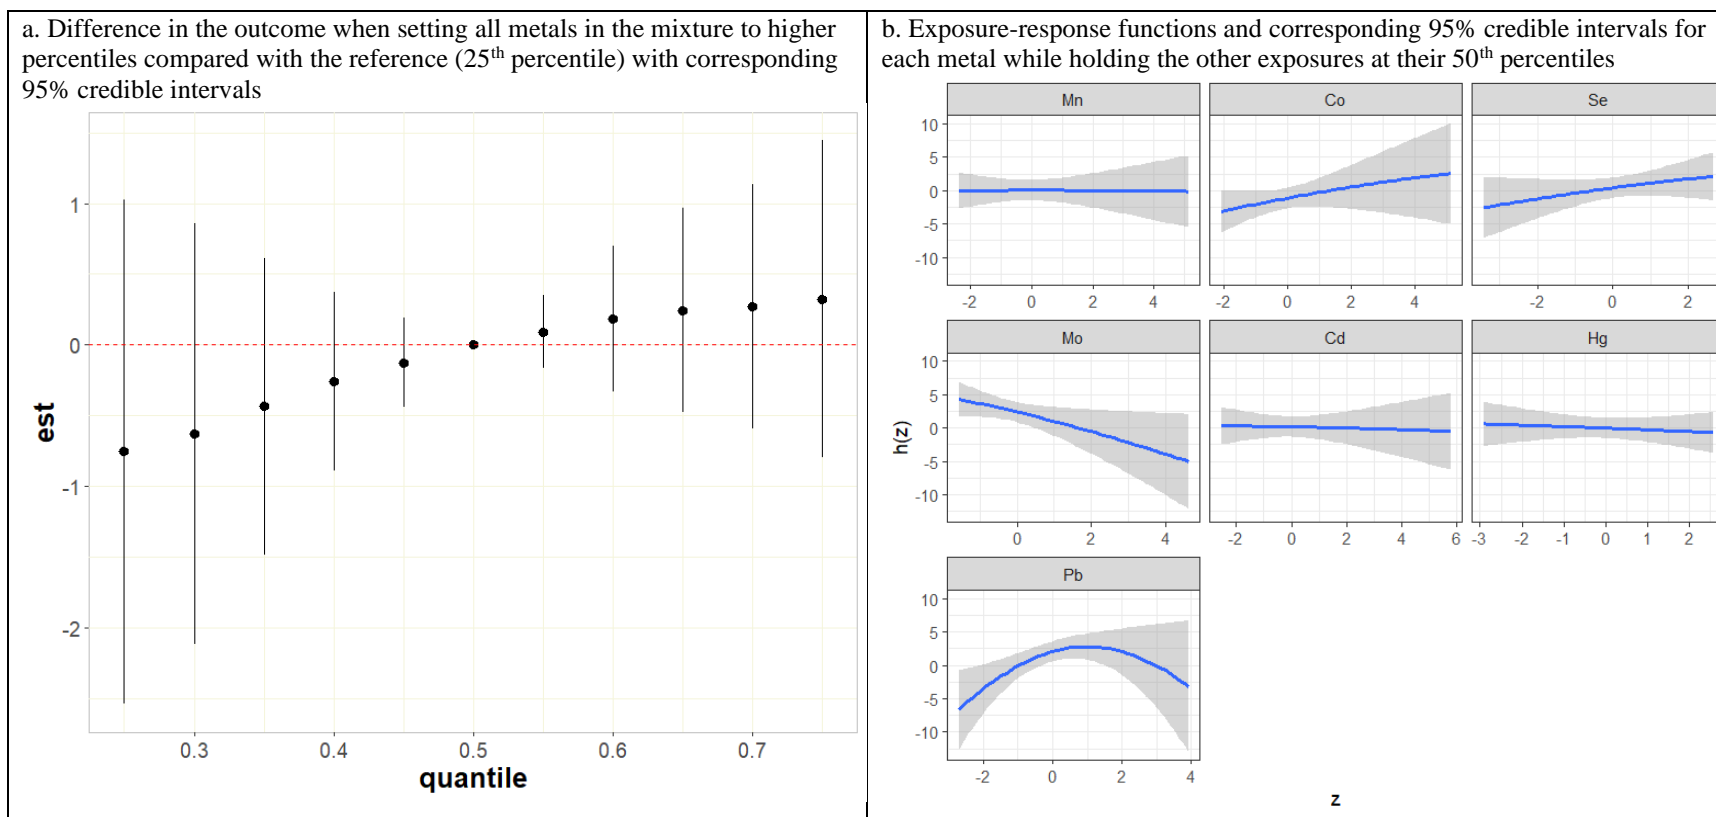

c. Exposure-response function for each metal (column) setting a second metal (row) to its 10<sup>th</sup>, 50<sup>th</sup>, and 90<sup>th</sup> percentiles, while holding the other exposures at their 50<sup>th</sup> percentiles

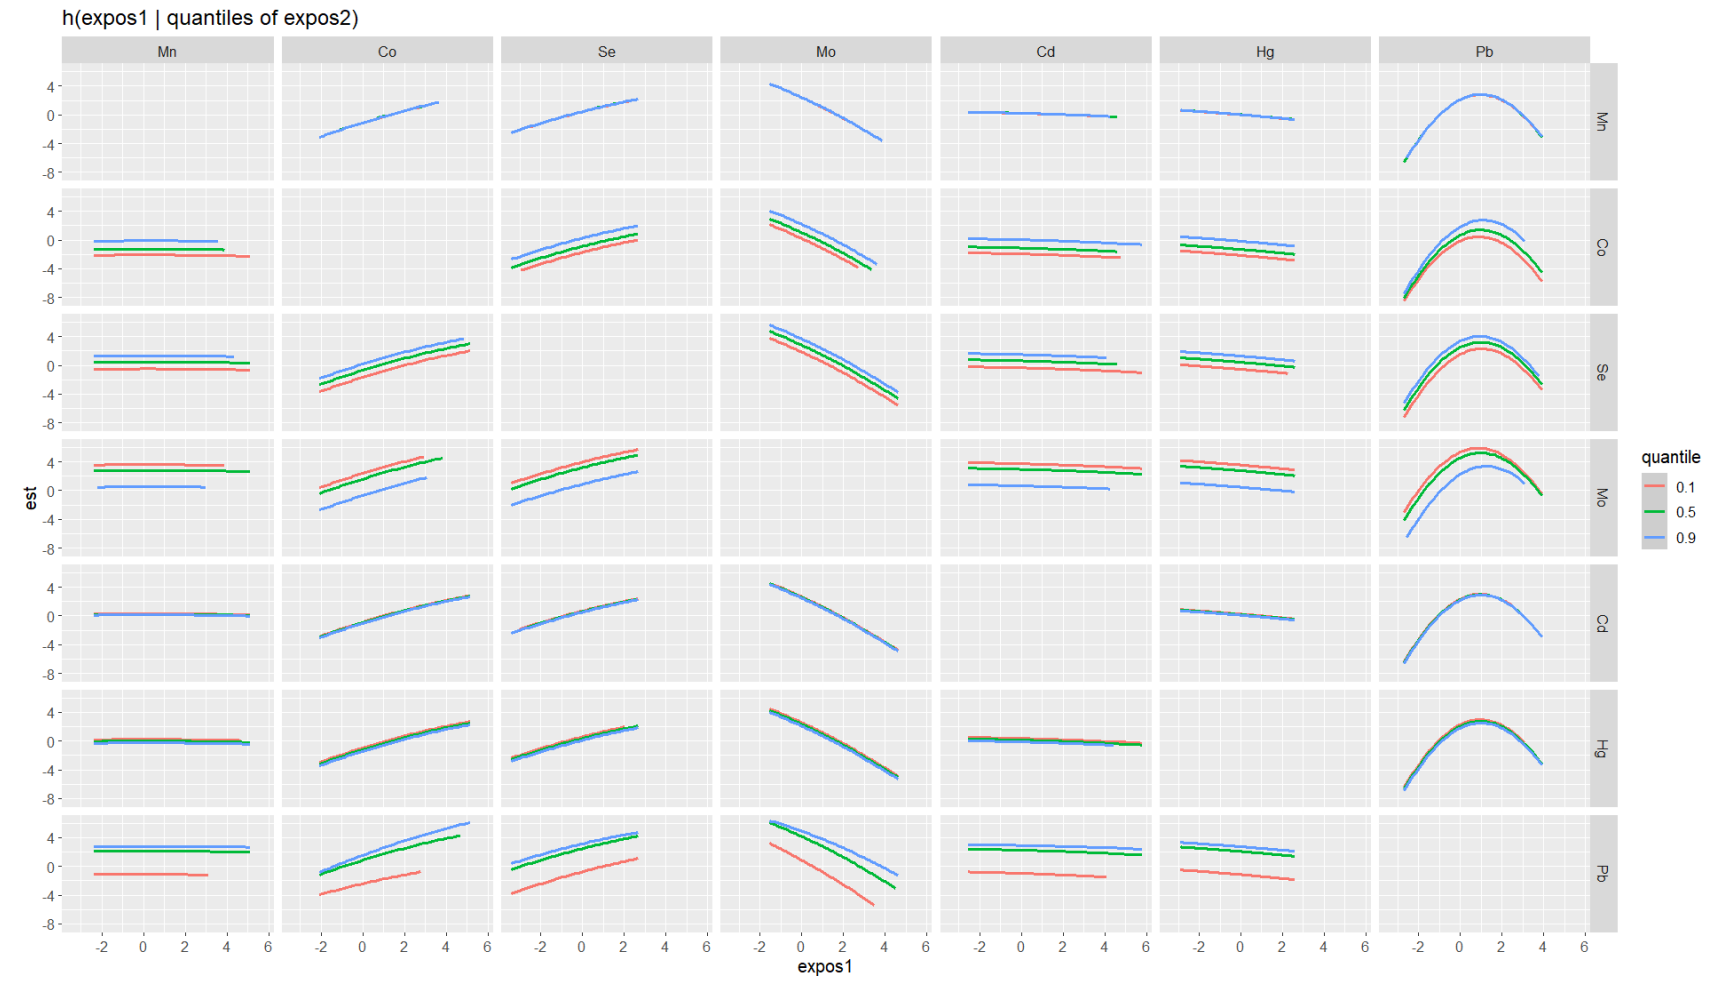

Abbreviations: Mn, manganese; Co, cobalt; Se, selenium; Mo, molybdenum; Cd, cadmium; Hg, mercury; Pb, lead. All models were adjusted for maternal education, child sex, child secondhand smoke exposure at 4 years of age, and child fish/seafood intake at 4 years of age.

Figure S6. Joint associations of the metals with triglycerides at 4 years of age, estimated by BKMR (n=291)

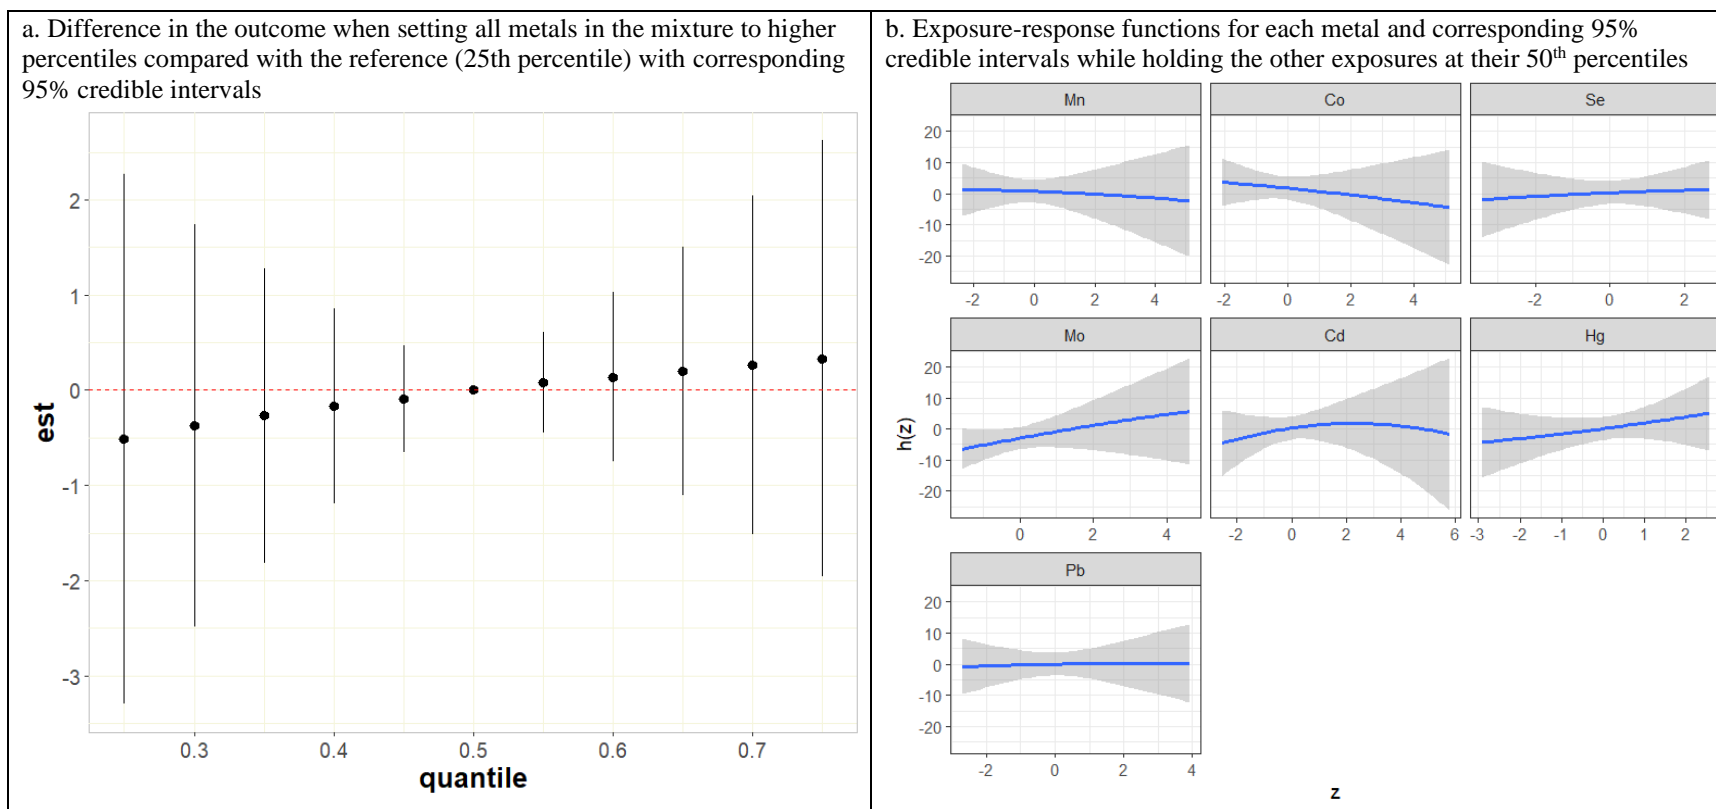

c. Exposure-response function for each metal (column) setting a second metal exposure (row) at its 10<sup>th</sup>, 50<sup>th</sup>, and 90<sup>th</sup> percentiles, while holding the other exposures at their 50<sup>th</sup> percentiles

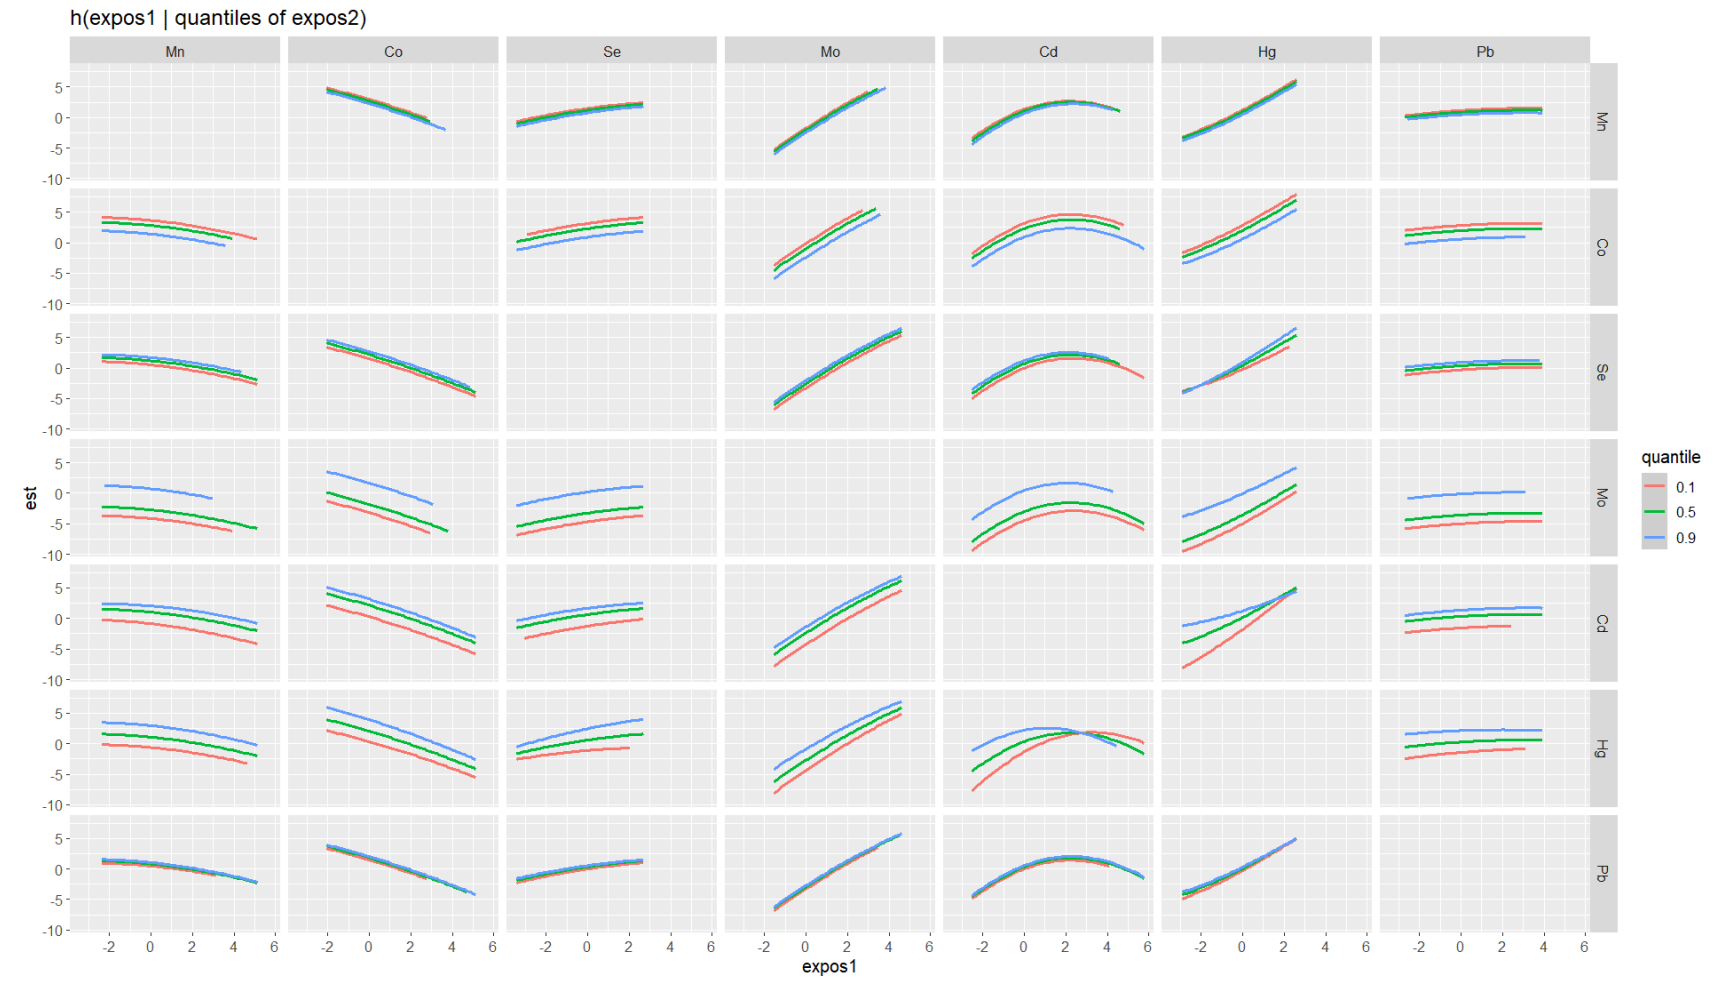

Abbreviations: Mn, manganese; Co, cobalt; Se, selenium; Mo, molybdenum; Cd, cadmium; Hg, mercury; Pb, lead. All models were adjusted for maternal education, child sex, child secondhand smoke exposure at 4 years of age, and child fish/seafood intake at 4 years of age.



Table S3. Quantile g-computation estimates (psi and 95% confidence bounds) for the difference in each lipid measure at age 4 for a simultaneous decile increase in all metals (Co, Mn, Mo, Se, Cd, Hg, and Pb; n=291)

| <b>Total cholesterol</b><br>(mg/dL) | <b>Low-density lipoprotein cholesterol</b><br>(mg/dL) | <b>High-density lipoprotein cholesterol</b><br>(mg/dL) | <b>Triglycerides</b><br>(mg/dL) |
|-------------------------------------|-------------------------------------------------------|--------------------------------------------------------|---------------------------------|
| 3.79 (1.45, 6.14)                   | 3.19 (1.13, 5.24)                                     | 0.27 (-0.66, 1.19)                                     | 1.69 (-0.67, 4.05)              |

Abbreviations: Mn, manganese; Co, cobalt; Se, selenium; Mo, molybdenum; Cd, cadmium; Hg, mercury; Pb, lead. All models were adjusted for maternal education, child sex, child secondhand smoke exposure at 4 years of age, and child fish/seafood intake at 4 years of age.

Table S4. Quantile g-computation weights for each metal in the mixture in relation to each lipid measure (n=291)

| Exposure | Total cholesterol (mg/dL) |                  | Low-density lipoprotein cholesterol (mg/dL) |                  | High-density lipoprotein cholesterol (mg/dL) |                  | Triglycerides (mg/dL) |                  |
|----------|---------------------------|------------------|---------------------------------------------|------------------|----------------------------------------------|------------------|-----------------------|------------------|
|          | Pos <sup>a</sup>          | Neg <sup>a</sup> | Pos <sup>a</sup>                            | Neg <sup>a</sup> | Pos <sup>a</sup>                             | Neg <sup>a</sup> | Pos <sup>a</sup>      | Neg <sup>a</sup> |
| Mn       | 0.15                      |                  | 0.17                                        |                  | 0.02                                         |                  |                       | 0.37             |
| Co       |                           | 0.53             |                                             | 0.71             | 0.27                                         |                  |                       | 0.63             |
| Se       | 0.46                      |                  | 0.38                                        |                  | 0.32                                         |                  | 0.25                  |                  |
| Mo       | 0.10                      |                  | 0.23                                        |                  |                                              | 0.67             | 0.25                  |                  |
| Cd       |                           | 0.48             |                                             | 0.29             |                                              | 0.21             | 0.36                  |                  |
| Hg       | 0.03                      |                  | 0.05                                        |                  |                                              | 0.12             | 0.11                  |                  |
| Pb       | 0.26                      |                  | 0.17                                        |                  | 0.40                                         |                  | 0.03                  |                  |

<sup>a</sup> Sum of positive and negative coefficients were 4.35 and -0.56 for total cholesterol, 2.21 and -0.53 for triglycerides, 1.17 and -0.90 for high-density lipoprotein cholesterol, and 3.95 and -0.76 for low-density lipoprotein cholesterol, respectively.

Abbreviations: Mn, manganese; Co, cobalt; Se, selenium; Mo, molybdenum; Cd, cadmium; Hg, mercury; Pb, lead. All models were adjusted for maternal education, child sex, child secondhand smoke exposure at 4 years of age, and child fish/seafood intake at 4 years of age.

Figure S7. Joint associations of the metals with (A) total cholesterol, (B) low-density lipoprotein (LDL) cholesterol, (C) high-density lipoprotein (HDL) cholesterol, and (D) triglycerides at 4 years of age, estimated by quantile g-computation (n=291)

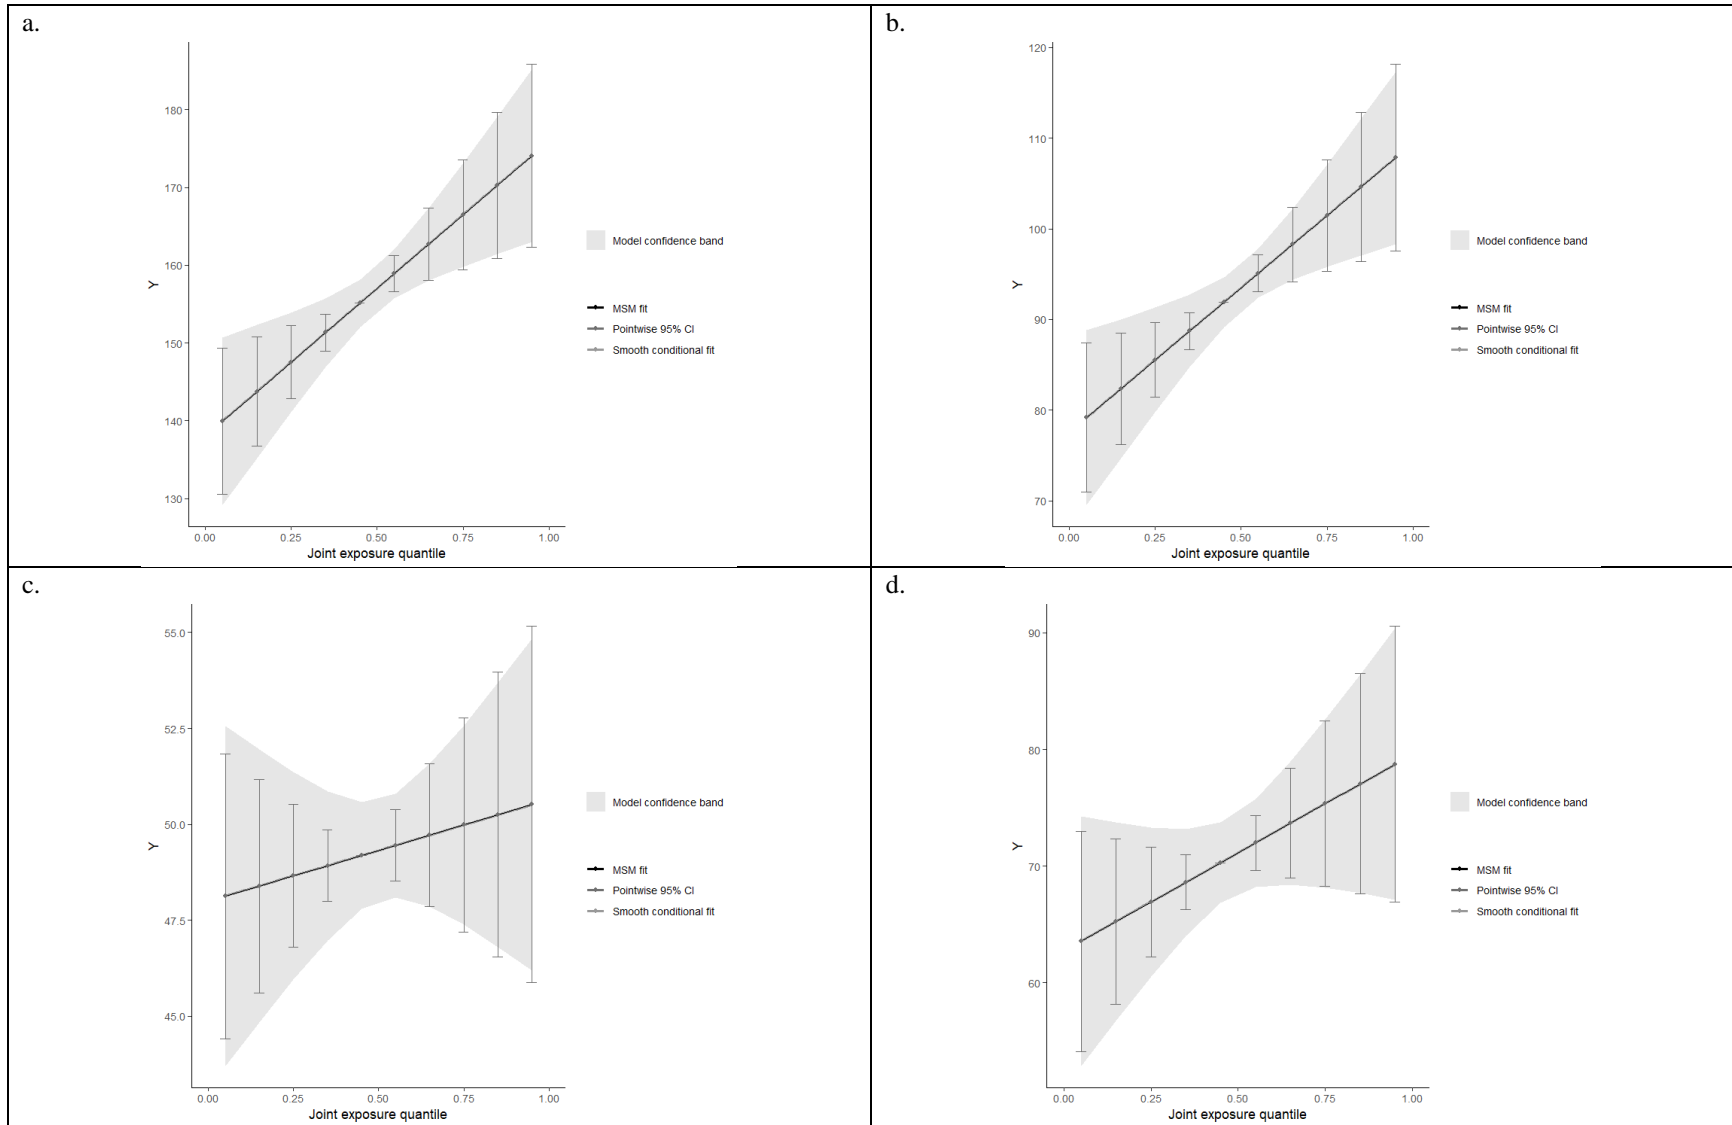

All models were adjusted for maternal education, child sex, child secondhand smoke exposure at 4 years of age, and child fish/seafood intake at 4 years of age.

Table S5. Difference in lipid measure levels setting all metals (Co, Mn, Mo, Se, Cd, Hg, and Pb) to their 75<sup>th</sup> compared with 25<sup>th</sup> percentile concentrations and holding all other metals in the mixture at their median values, estimated by BKMR additionally adjusting for red meat consumption (n=291)

| <b>Lipid measure</b>                         | <b>75<sup>th</sup> vs. 25<sup>th</sup> percentiles</b> |
|----------------------------------------------|--------------------------------------------------------|
| Total cholesterol (mg/dL)                    | 8.44 (0.04, 16.84)                                     |
| Low-density lipoprotein cholesterol (mg/dL)  | 7.30 (0.82, 13.78)                                     |
| High-density lipoprotein cholesterol (mg/dL) | 1.07 (-1.68, 3.82)                                     |
| Triglycerides (mg/dL)                        | 0.70 (-3.44, 4.85)                                     |

All models were adjusted for maternal education, child sex, child secondhand smoke exposure at 4 years of age, child fish/seafood intake, and red meat consumption at 4 years of age.

Table S6. Posterior inclusion probabilities (PIP) and effect estimates for each metal, holding all other metals in the mixture constant at their median values, in association with lipid measures at 4 years of age, estimated by BKMR additionally adjusting for red meat consumption (n=291)

| Exposure | Total cholesterol |                                                                | Low-density lipoprotein cholesterol |                                                                | High-density lipoprotein cholesterol |                                                                | Triglycerides |                                                                |
|----------|-------------------|----------------------------------------------------------------|-------------------------------------|----------------------------------------------------------------|--------------------------------------|----------------------------------------------------------------|---------------|----------------------------------------------------------------|
|          | PIP               | 75 <sup>th</sup> vs. 25 <sup>th</sup> percentiles <sup>a</sup> | PIP                                 | 75 <sup>th</sup> vs. 25 <sup>th</sup> percentiles <sup>a</sup> | PIP                                  | 75 <sup>th</sup> vs. 25 <sup>th</sup> percentiles <sup>a</sup> | PIP           | 75 <sup>th</sup> vs. 25 <sup>th</sup> percentiles <sup>a</sup> |
| Mn       | <0.01             | 0.01 (-0.42, 0.44)                                             | 0.03                                | 0.05 (-0.92, 1.03)                                             | 0.01                                 | <-0.01 (-0.18, 0.18)                                           | 0.03          | -0.02 (-1.14, 1.10)                                            |
| Co       | <0.01             | 0 (0, 0)                                                       | 0.03                                | -0.01 (-0.77, 0.76)                                            | 0.06                                 | -0.02 (-0.63, 0.59)                                            | 0.04          | 0.02 (-1.05, 1.09)                                             |
| Se       | 0.92              | 8.48 (0.66, 16.30)                                             | 0.96                                | 8.43 (2.33, 14.53)                                             | 0.03                                 | 0.04 (-0.51, 0.59)                                             | 0.05          | 0.03 (-1.27, 1.33)                                             |
| Mo       | 0.04              | 0.11 (-1.39, 1.60)                                             | 0.21                                | 0.80 (-2.82, 4.43)                                             | 0.10                                 | -0.20 (-1.57, 1.18)                                            | 0.08          | 0.19 (-1.67, 2.04)                                             |
| Cd       | 0.30              | 0.94 (-3.06, 4.93)                                             | 0.76                                | 1.89 (-2.52, 6.30)                                             | 0.01                                 | -0.01 (-0.26, 0.24)                                            | 0.12          | 0.42 (-2.61, 3.46)                                             |
| Hg       | 0.01              | 0.01 (-0.49, 0.51)                                             | <0.01                               | <-0.01 (-0.25, 0.25)                                           | 0.01                                 | -0.01 (-0.24, 0.23)                                            | 0.16          | 0.44 (-2.64, 3.52)                                             |
| Pb       | 0.19              | 1.14 (-4.09, 6.37)                                             | 0.04                                | 0.14 (-1.48, 1.75)                                             | 0.53                                 | 1.00 (-1.55, 3.55)                                             | 0.02          | <0.01 (-0.80, 0.80)                                            |

<sup>a</sup> The difference in the lipid measure when setting each metal component to its 75<sup>th</sup> percentile versus 25<sup>th</sup> percentile, while holding all other metals constant at their median values.

Abbreviations: Mn, manganese; Co, cobalt; Se, selenium; Mo, molybdenum; Cd, cadmium; Hg, mercury; Pb, lead. All models were adjusted for maternal education, child sex, child secondhand smoke exposure at 4 years of age, child fish/seafood intake, and red meat consumption at 4 years of age.

Figure S8. Joint associations of the metals with total cholesterol at 4 years of age estimated by BKMR additionally adjusting for red meat consumption (n=291)

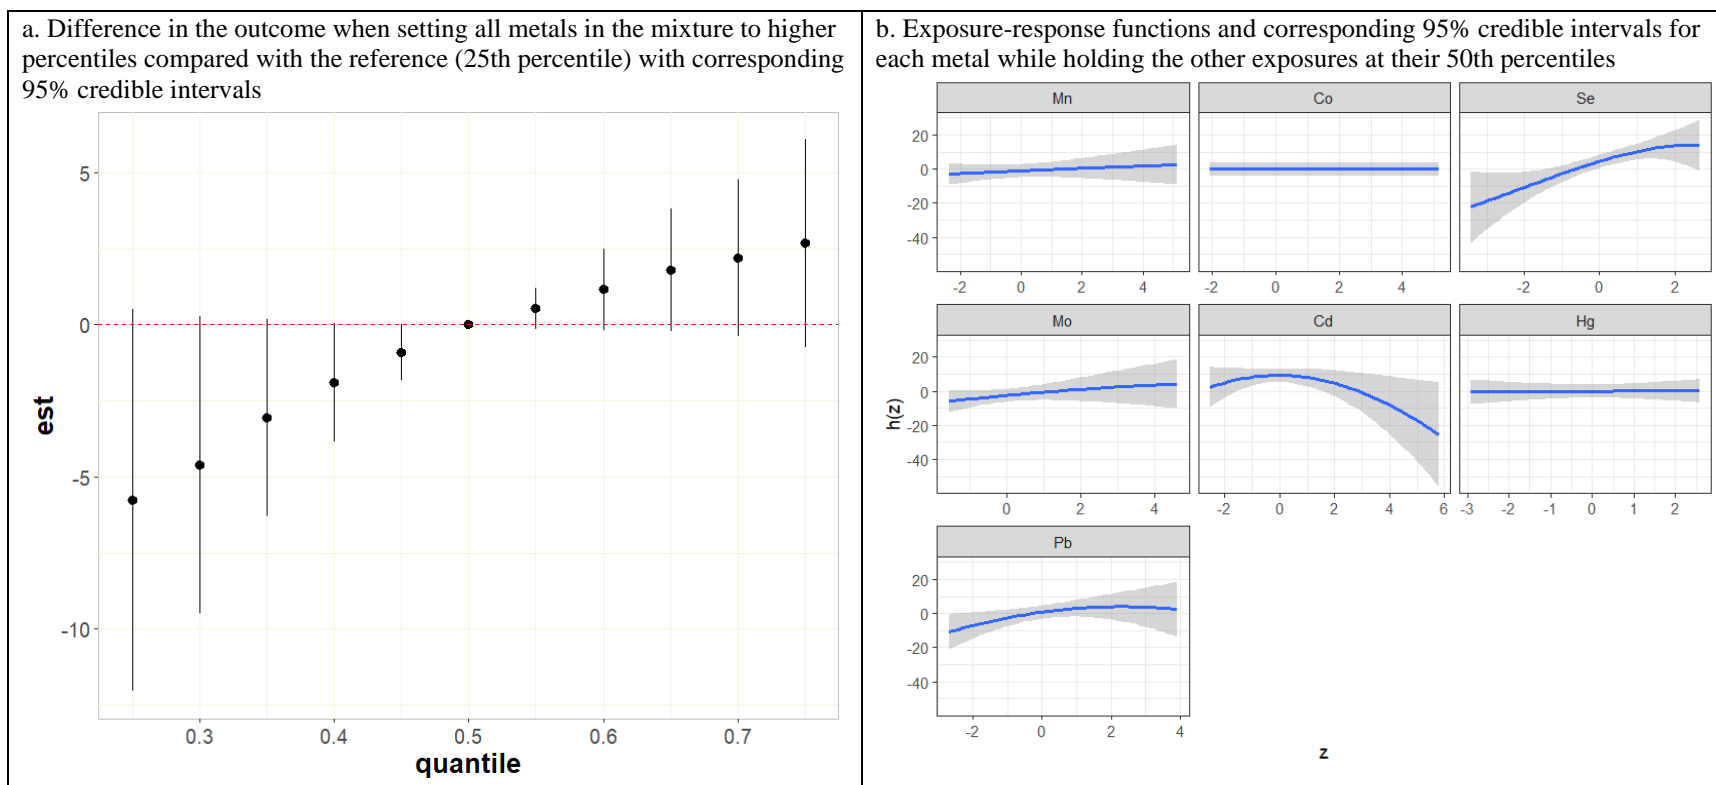

c. Exposure-response function for each metal exposure (column) with the second exposure (row) fixed at its 10<sup>th</sup>, 50<sup>th</sup>, and 90<sup>th</sup> percentiles, while holding the other exposures at their 50<sup>th</sup> percentiles

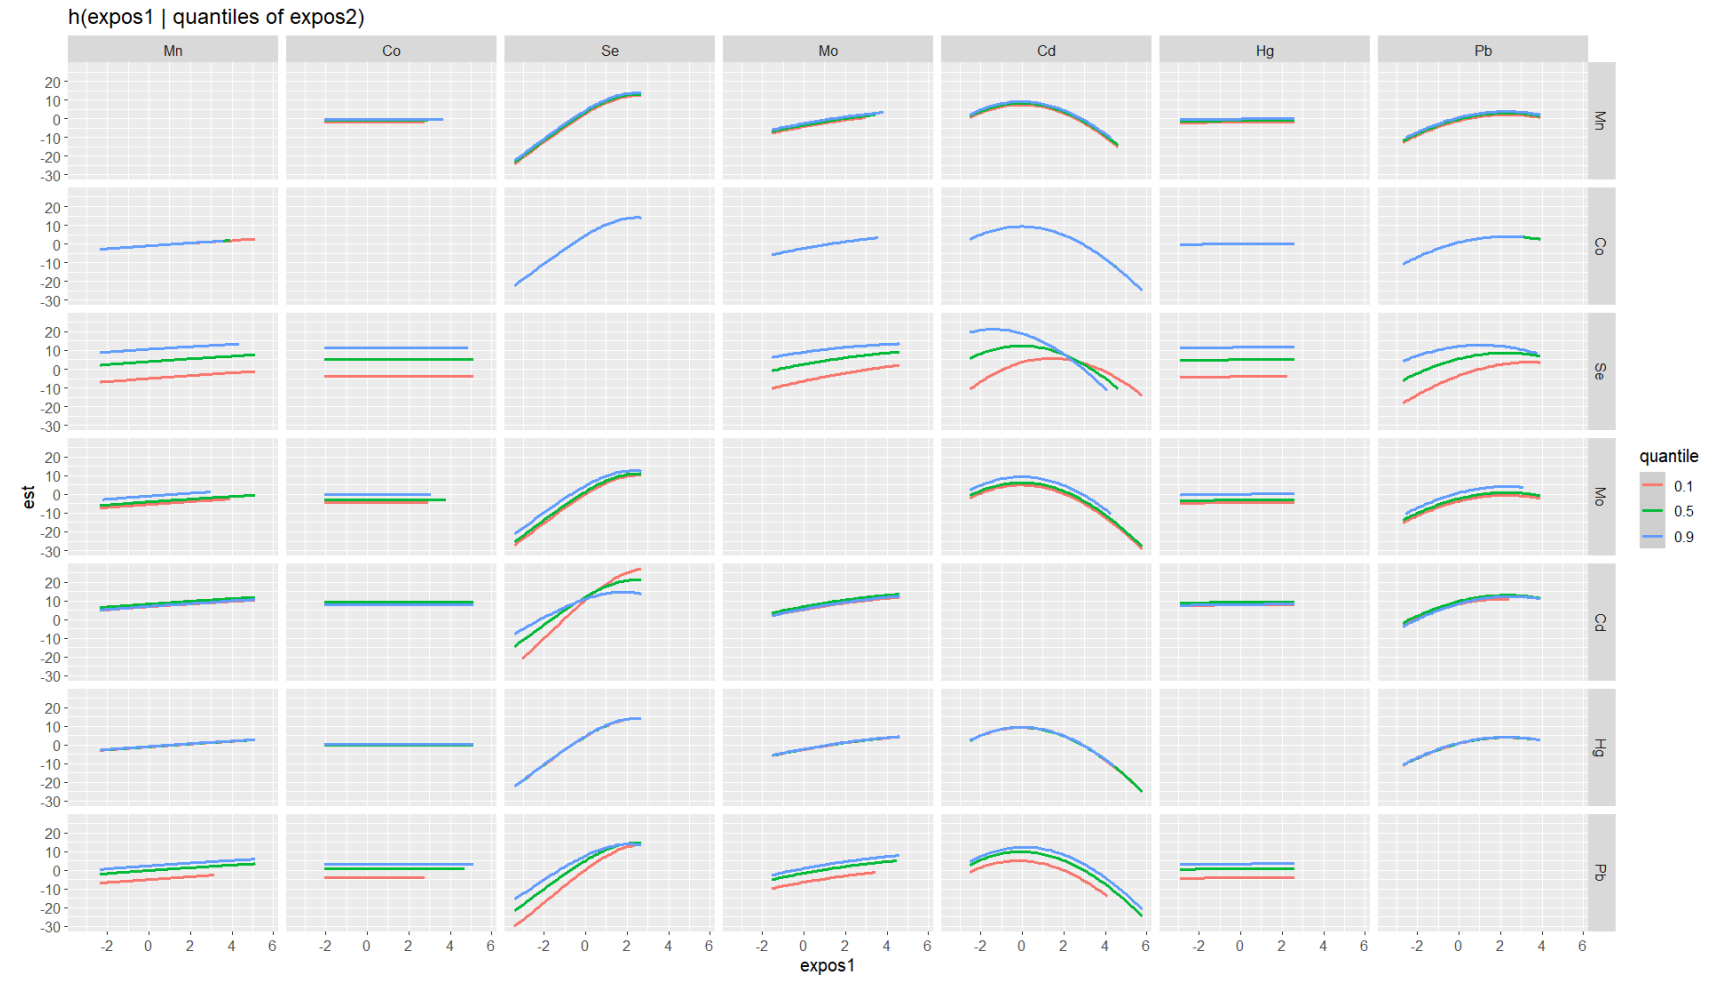

Abbreviations: Mn, manganese; Co, cobalt; Se, selenium; Mo, molybdenum; Cd, cadmium; Hg, mercury; Pb, lead. All models were adjusted for maternal education, child sex, child secondhand smoke exposure at 4 years of age, child fish/seafood intake, and red meat consumption at 4 years of age.

Figure S9. Joint associations of the metals with low-density lipoprotein cholesterol at 4 years of age estimated by BKMR additionally adjusting for red meat consumption (n=291)

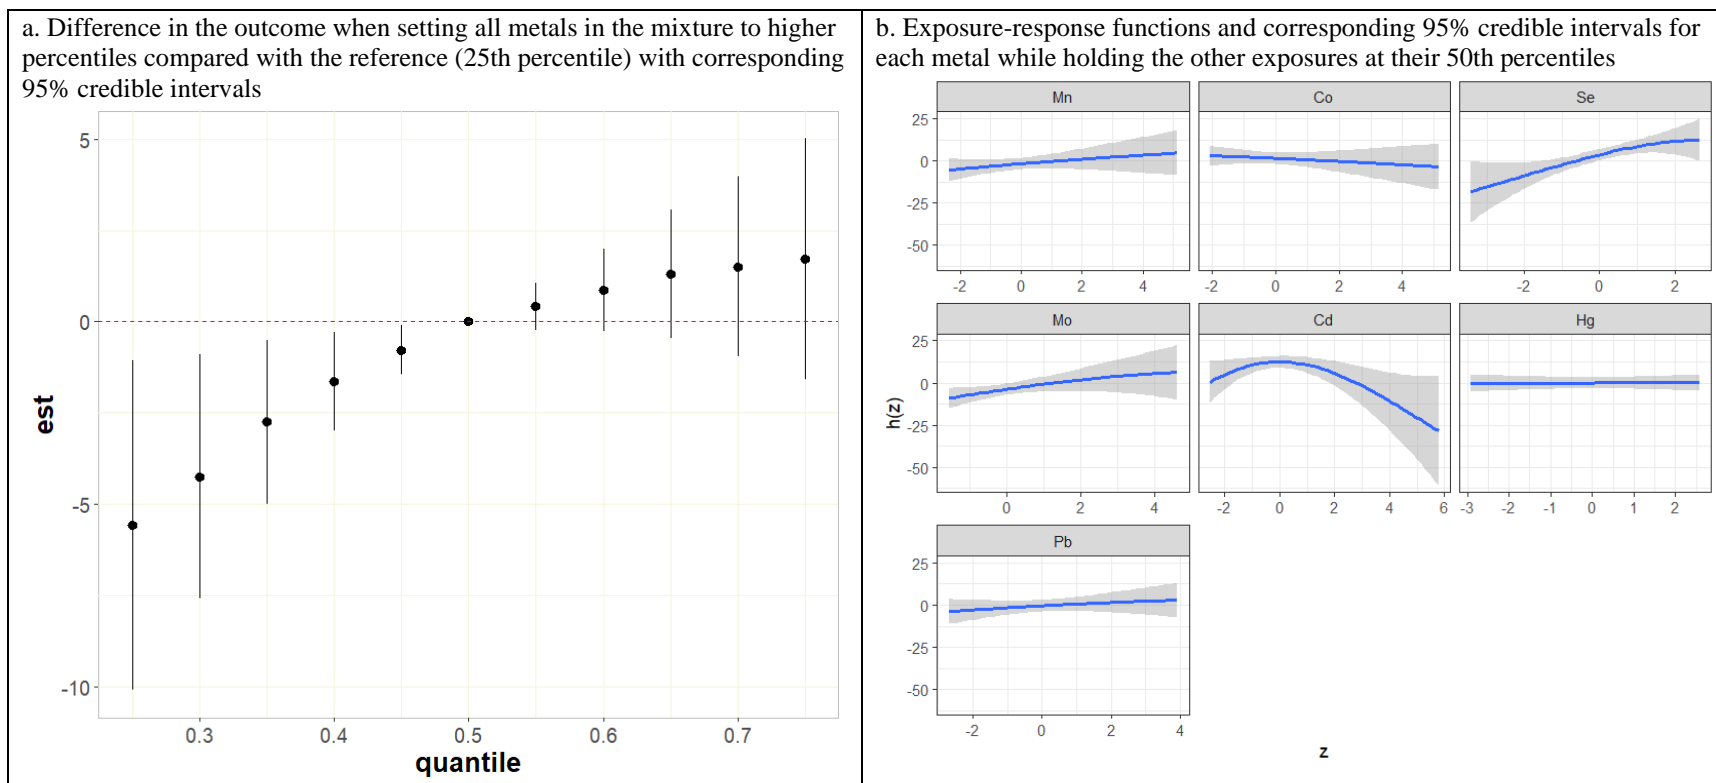



c. Exposure-response function for each metal exposure (column) with the second exposure (row) fixed at its 10<sup>th</sup>, 50<sup>th</sup>, and 90<sup>th</sup> percentiles, while holding the other exposures at their 50<sup>th</sup> percentiles

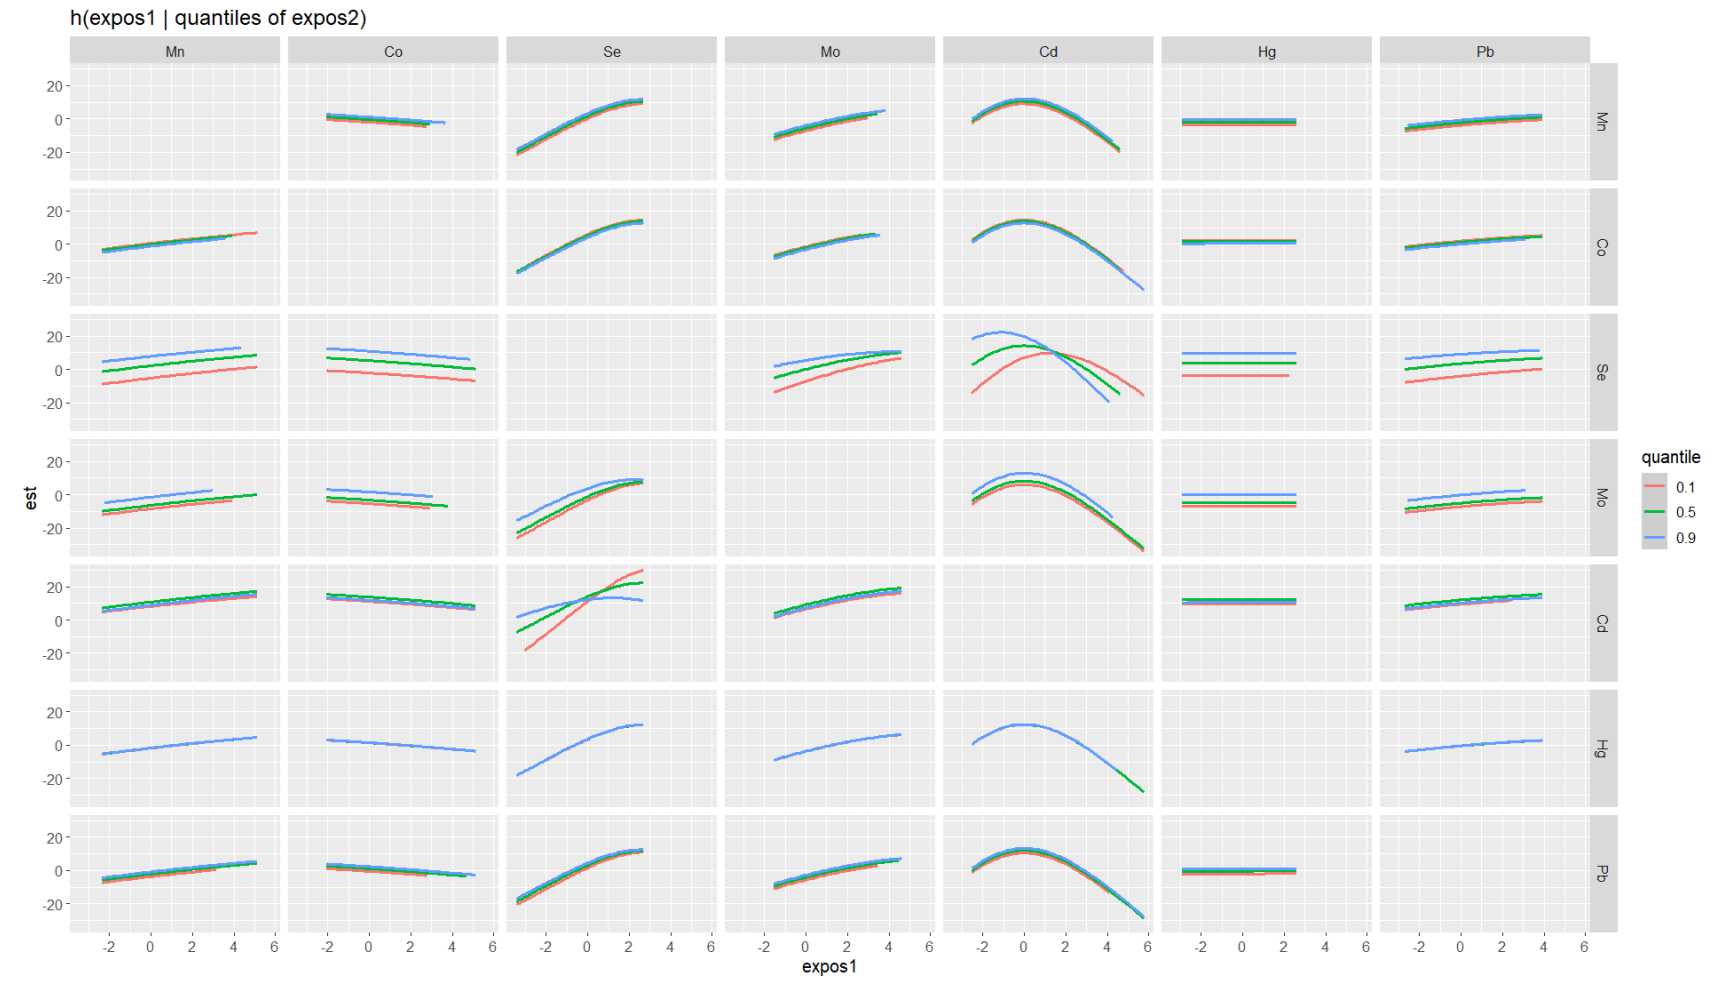

Abbreviations: Mn, manganese; Co, cobalt; Se, selenium; Mo, molybdenum; Cd, cadmium; Hg, mercury; Pb, lead. All models were adjusted for maternal education, child sex, child secondhand smoke exposure at 4 years of age, child fish/seafood intake, and red meat consumption at 4 years of age.

Figure S10. Joint associations of the metals with high-density lipoprotein cholesterol at 4 years of age estimated by BKMR additionally adjusting for red meat consumption (n=291)

a. Difference in the outcome when setting all metals in the mixture to higher percentiles compared with the reference (25th percentile) with corresponding 95% credible intervals

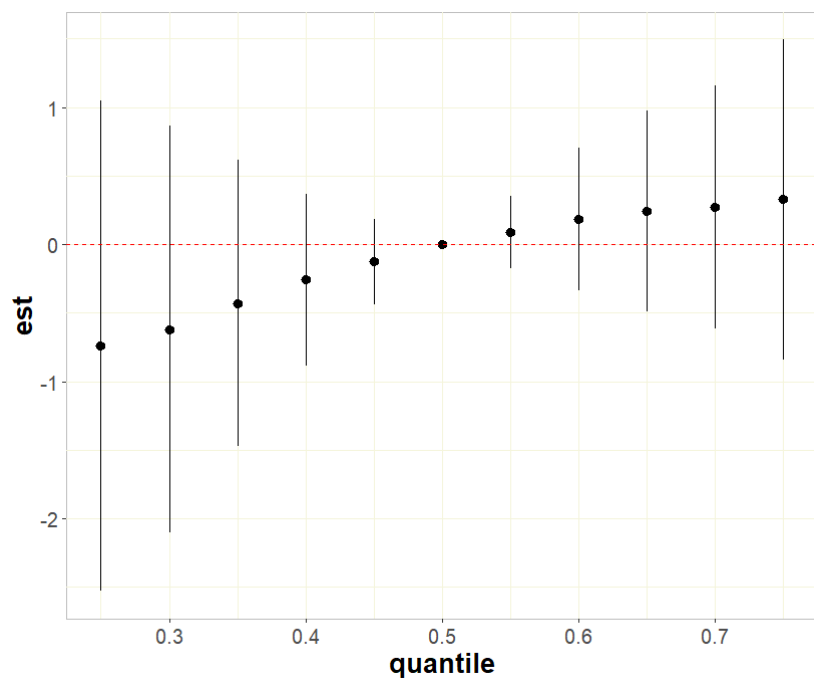

b. Exposure-response functions and corresponding 95% credible intervals for each metal while holding the other exposures at their 50th percentiles

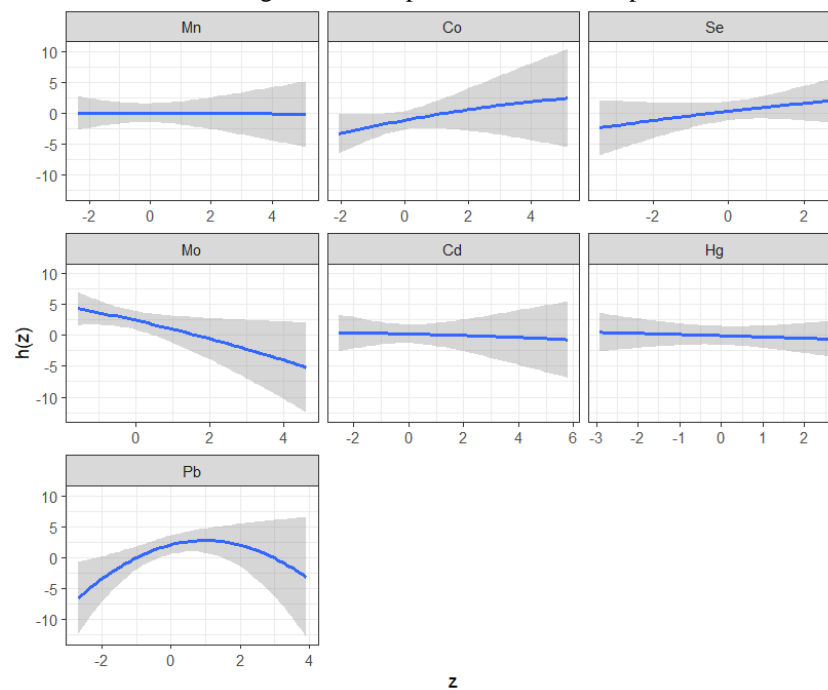

c. Exposure-response function for each metal exposure (column) with the second exposure (row) fixed at its 10<sup>th</sup>, 50<sup>th</sup>, and 90<sup>th</sup> percentiles, while holding the other exposures at their 50<sup>th</sup> percentiles

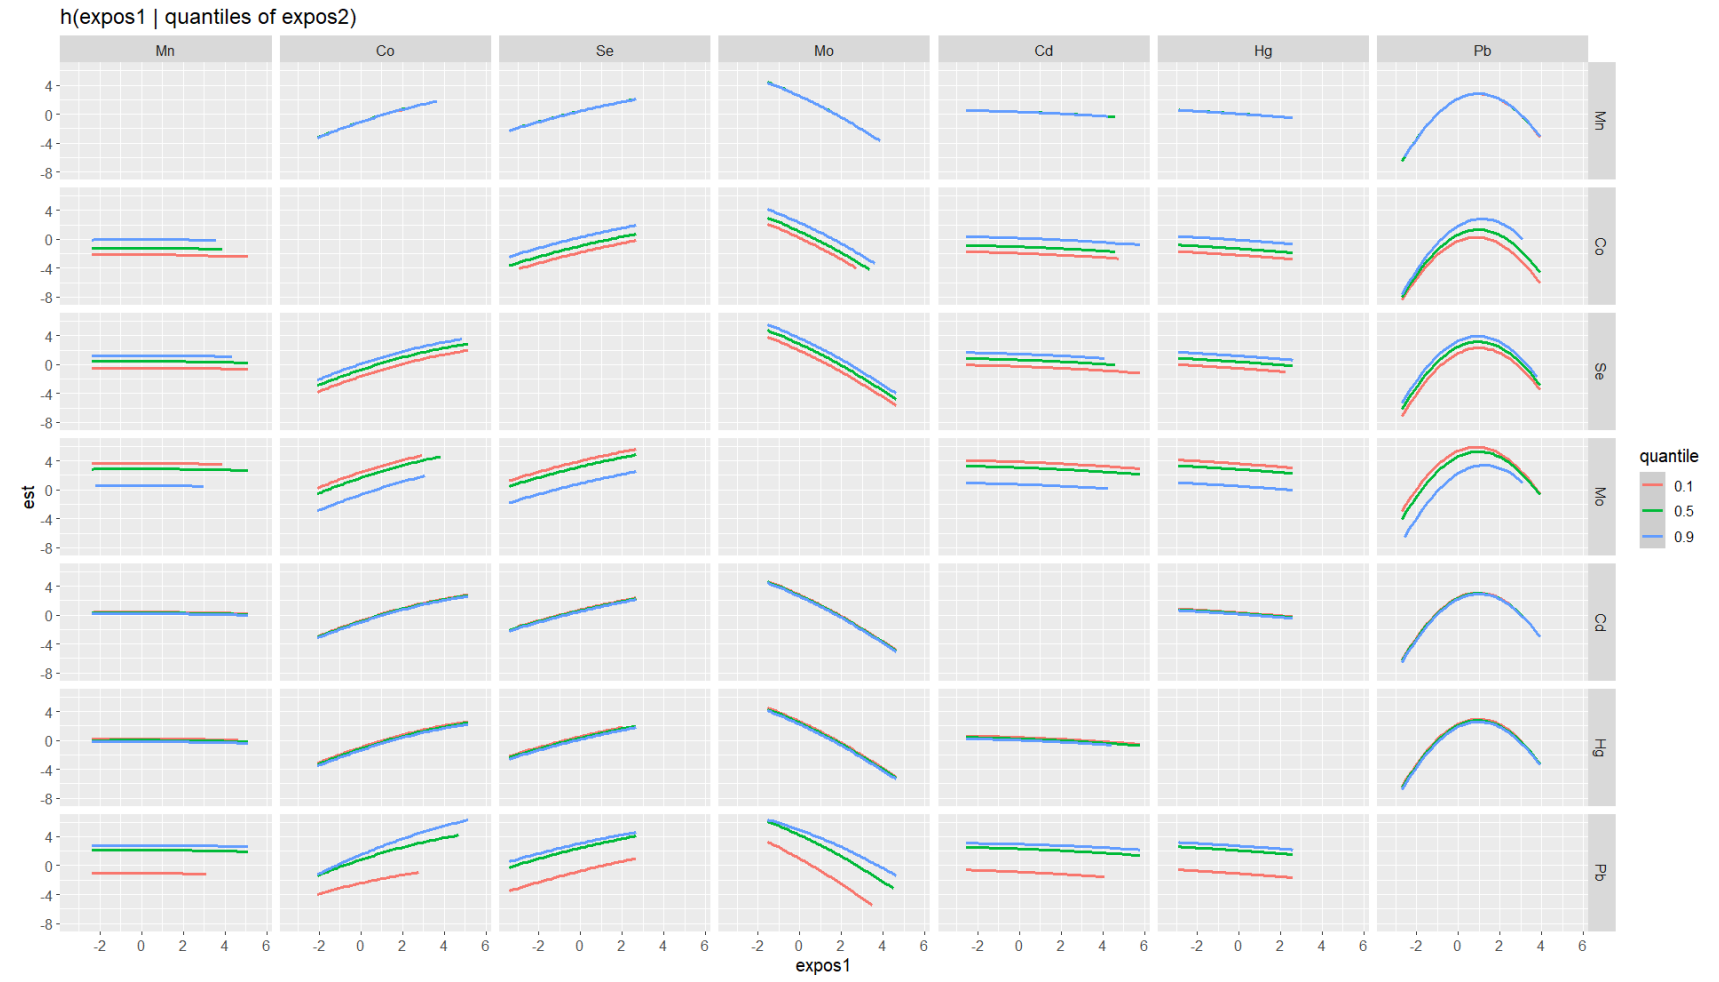

Abbreviations: Mn, manganese; Co, cobalt; Se, selenium; Mo, molybdenum; Cd, cadmium; Hg, mercury; Pb, lead. All models were adjusted for maternal education, child sex, child secondhand smoke exposure at 4 years of age, child fish/seafood intake, and red meat consumption at 4 years of age.

Figure S11. Joint associations of the metals with triglycerides at 4 years of age estimated by BKMR additionally adjusting for red meat consumption (n=291)

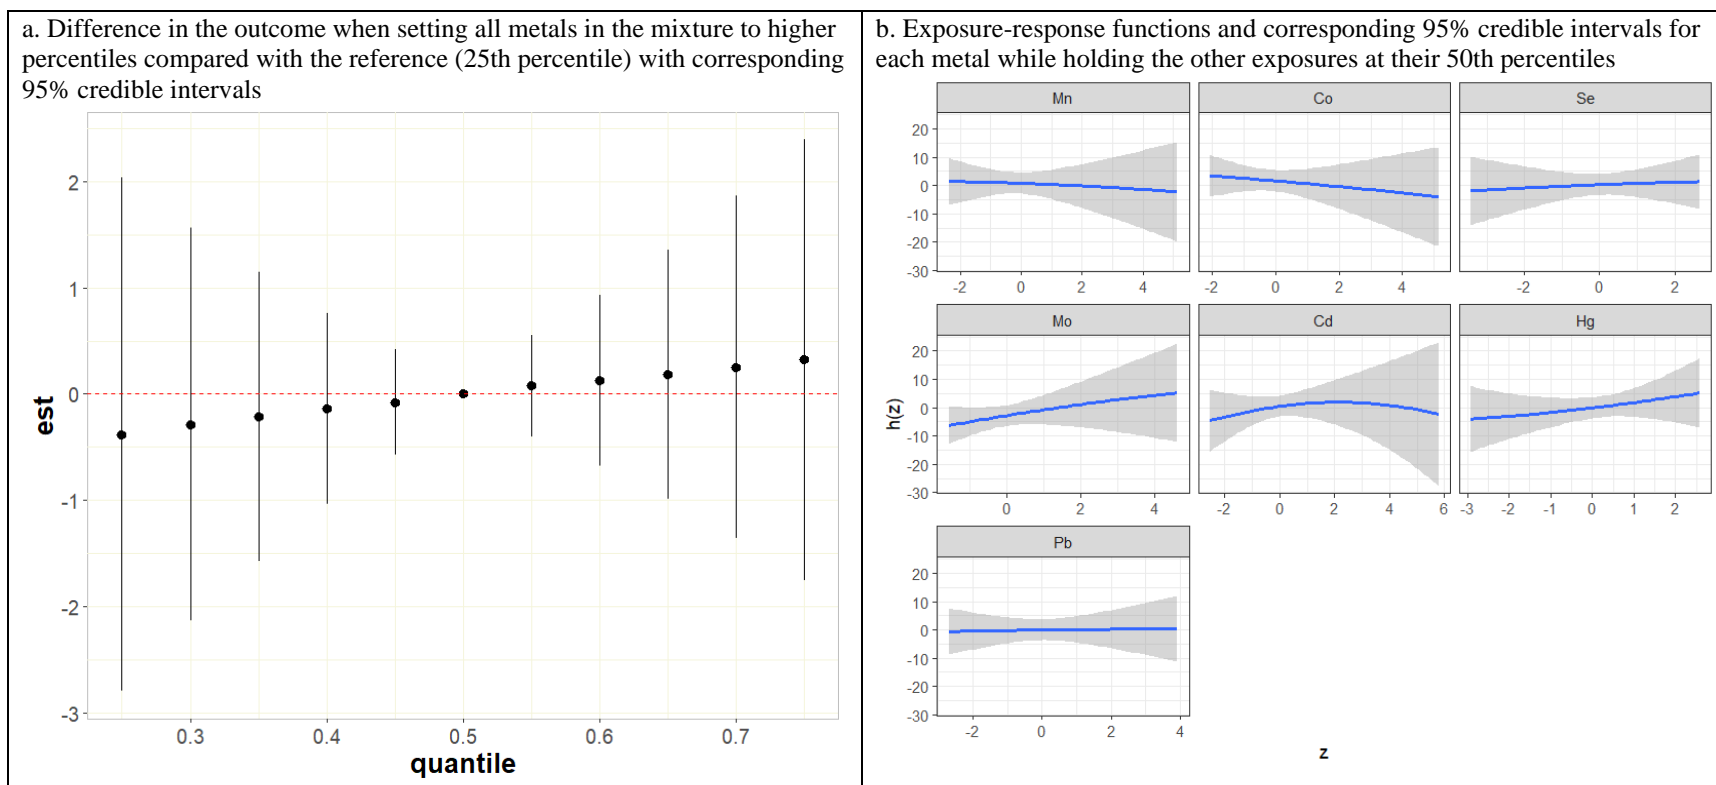

c. Exposure-response function for each metal exposure (column) with the second exposure (row) fixed at its 10<sup>th</sup>, 50<sup>th</sup>, and 90<sup>th</sup> percentiles, while holding the other exposures at their 50<sup>th</sup> percentiles

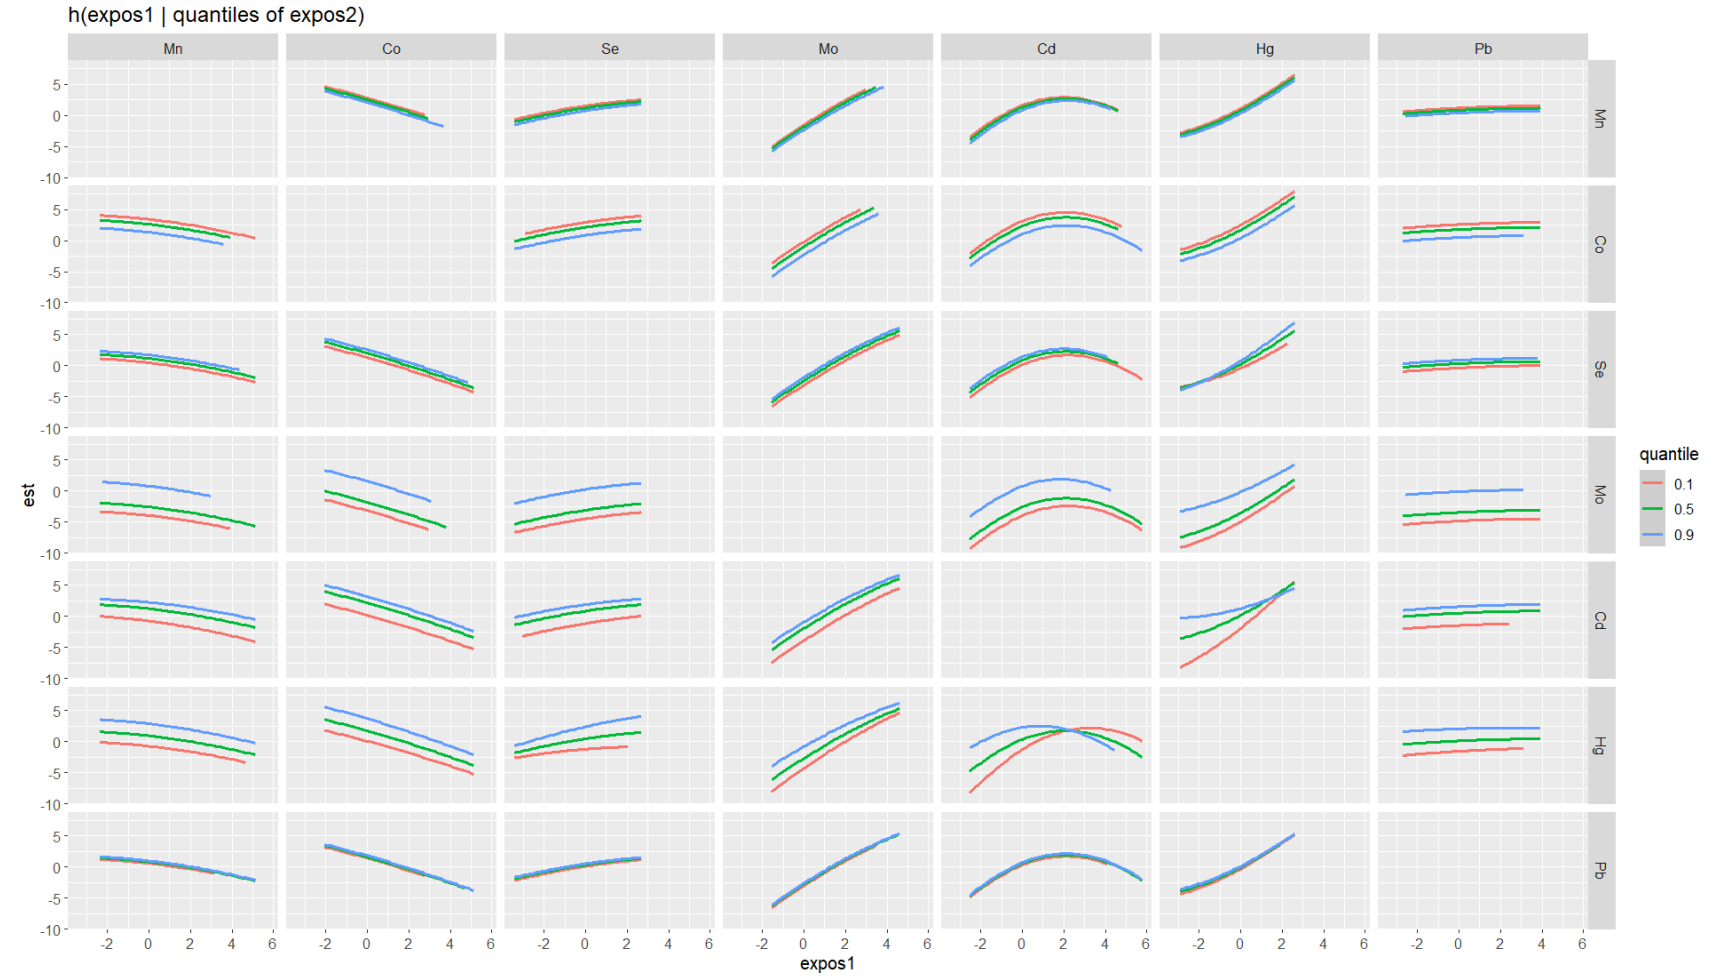

Abbreviations: Mn, manganese; Co, cobalt; Se, selenium; Mo, molybdenum; Cd, cadmium; Hg, mercury; Pb, lead. All models were adjusted for maternal education, child sex, child secondhand smoke exposure at 4 years of age, child fish/seafood intake, and red meat consumption at 4 years of age.

Table S7. Difference in lipid measure levels setting all metals (Co, Mn, Mo, Se, Cd, Hg, and Pb) to their 75<sup>th</sup> compared with 25<sup>th</sup> percentile concentrations and holding all other metals in the mixture at their median values, estimated by BKMR additionally adjusting for egg intake (n=291)

| <b>Lipid measure</b>                         | <b>75<sup>th</sup> vs. 25<sup>th</sup> percentiles</b> |
|----------------------------------------------|--------------------------------------------------------|
| Total cholesterol (mg/dL)                    | 9.18 (1.23, 17.13)                                     |
| Low-density lipoprotein cholesterol (mg/dL)  | 7.45 (1.29, 13.62)                                     |
| High-density lipoprotein cholesterol (mg/dL) | 1.01 (-1.78, 3.80)                                     |
| Triglycerides (mg/dL)                        | 0.52 (-2.94, 3.97)                                     |

All models were adjusted for maternal education, child sex, child secondhand smoke exposure at 4 years of age, child fish/seafood intake, and egg intake at 4 years of age.

Table S8. Posterior inclusion probabilities (PIP) and effect estimates for each metal, holding all other metals in the mixture constant at their median values, in association with lipid measures at 4 years of age, estimated by BKMR additionally adjusting for egg intake (n=291)

| Exposure | Total cholesterol |                                                                | Low-density lipoprotein cholesterol |                                                                | High-density lipoprotein cholesterol |                                                                | Triglycerides |                                                                |
|----------|-------------------|----------------------------------------------------------------|-------------------------------------|----------------------------------------------------------------|--------------------------------------|----------------------------------------------------------------|---------------|----------------------------------------------------------------|
|          | PIP               | 75 <sup>th</sup> vs. 25 <sup>th</sup> percentiles <sup>a</sup> | PIP                                 | 75 <sup>th</sup> vs. 25 <sup>th</sup> percentiles <sup>a</sup> | PIP                                  | 75 <sup>th</sup> vs. 25 <sup>th</sup> percentiles <sup>a</sup> | PIP           | 75 <sup>th</sup> vs. 25 <sup>th</sup> percentiles <sup>a</sup> |
| Mn       | 0.01              | 0.03 (-0.76, 0.82)                                             | 0.02                                | 0.04 (-0.87, 0.95)                                             | 0.02                                 | <-0.01 (-0.29, 0.29)                                           | 0.02          | <-0.01 (-0.74, 0.73)                                           |
| Co       | 0.02              | 0.02 (-0.68, 0.72)                                             | 0.01                                | -0.01 (-0.55, 0.53)                                            | 0.04                                 | -0.02 (-0.55, 0.51)                                            | 0.06          | -0.02 (-1.14, 1.11)                                            |
| Se       | 0.96              | 8.94 (2.02, 15.86)                                             | 0.98                                | 8.75 (2.99, 14.51)                                             | 0.06                                 | 0.07 (-0.68, 0.83)                                             | 0.04          | 0.07 (-1.14, 1.28)                                             |
| Mo       | 0.03              | 0.08 (-1.19, 1.34)                                             | 0.18                                | 0.69 (-2.68, 4.06)                                             | 0.10                                 | -0.18 (-1.46, 1.10)                                            | 0.07          | 0.15 (-1.58, 1.89)                                             |
| Cd       | 0.31              | 0.80 (-2.96, 4.57)                                             | 0.73                                | 1.84 (-2.55, 6.23)                                             | 0.01                                 | <-0.01 (-0.16, 0.16)                                           | 0.09          | 0.25 (-1.88, 2.39)                                             |
| Hg       | <0.01             | 0 (0, 0)                                                       | 0.01                                | <-0.01 (-0.43, 0.43)                                           | 0.01                                 | <-0.01 (-0.21, 0.21)                                           | 0.07          | 0.22 (-1.99, 2.44)                                             |
| Pb       | 0.25              | 1.55 (-4.35, 7.45)                                             | 0.03                                | 0.06 (-1.07, 1.20)                                             | 0.49                                 | 0.97 (-1.54, 3.48)                                             | 0.03          | 0.01 (-0.99, 1.01)                                             |

<sup>a</sup> The difference in the lipid measure when setting each metal component to its 75<sup>th</sup> percentile versus 25<sup>th</sup> percentile, while holding all other metals constant at their median values.

Abbreviations: Mn, manganese; Co, cobalt; Se, selenium; Mo, molybdenum; Cd, cadmium; Hg, mercury; Pb, lead. All models were adjusted for maternal education, child sex, child secondhand smoke exposure at 4 years of age, child fish/seafood intake, and egg intake at 4 years of age.

Figure S12. Joint associations of the metals with total cholesterol at 4 years of age estimated by BKMR additionally adjusting for egg intake (n=291)

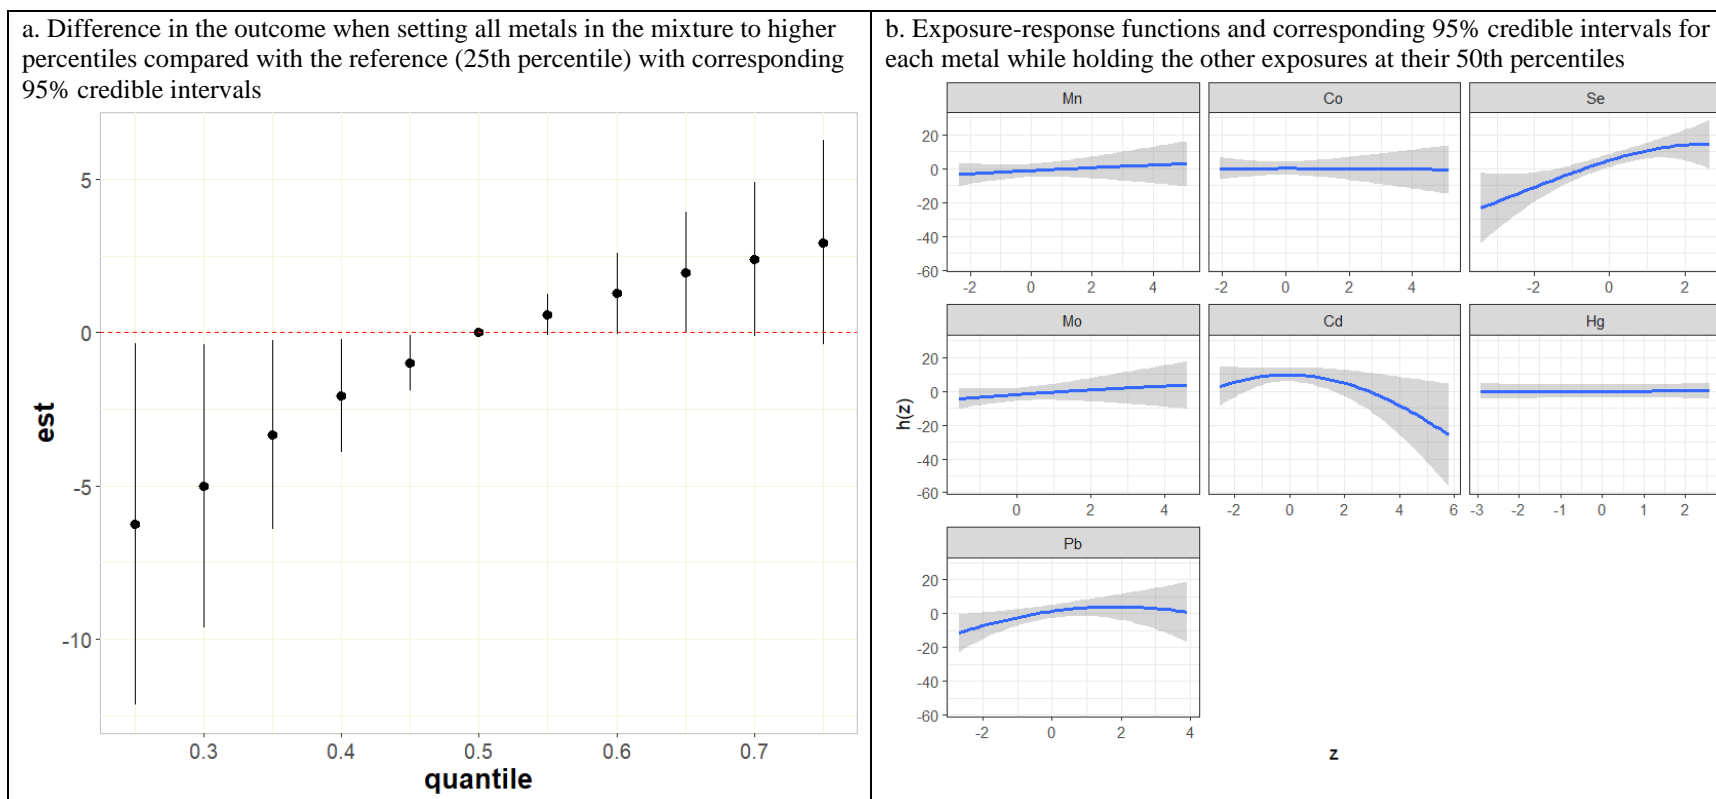



c. Exposure-response function for each metal exposure (column) with the second exposure (row) fixed at its 10<sup>th</sup>, 50<sup>th</sup>, and 90<sup>th</sup> percentiles, while holding the other exposures at their 50<sup>th</sup> percentiles

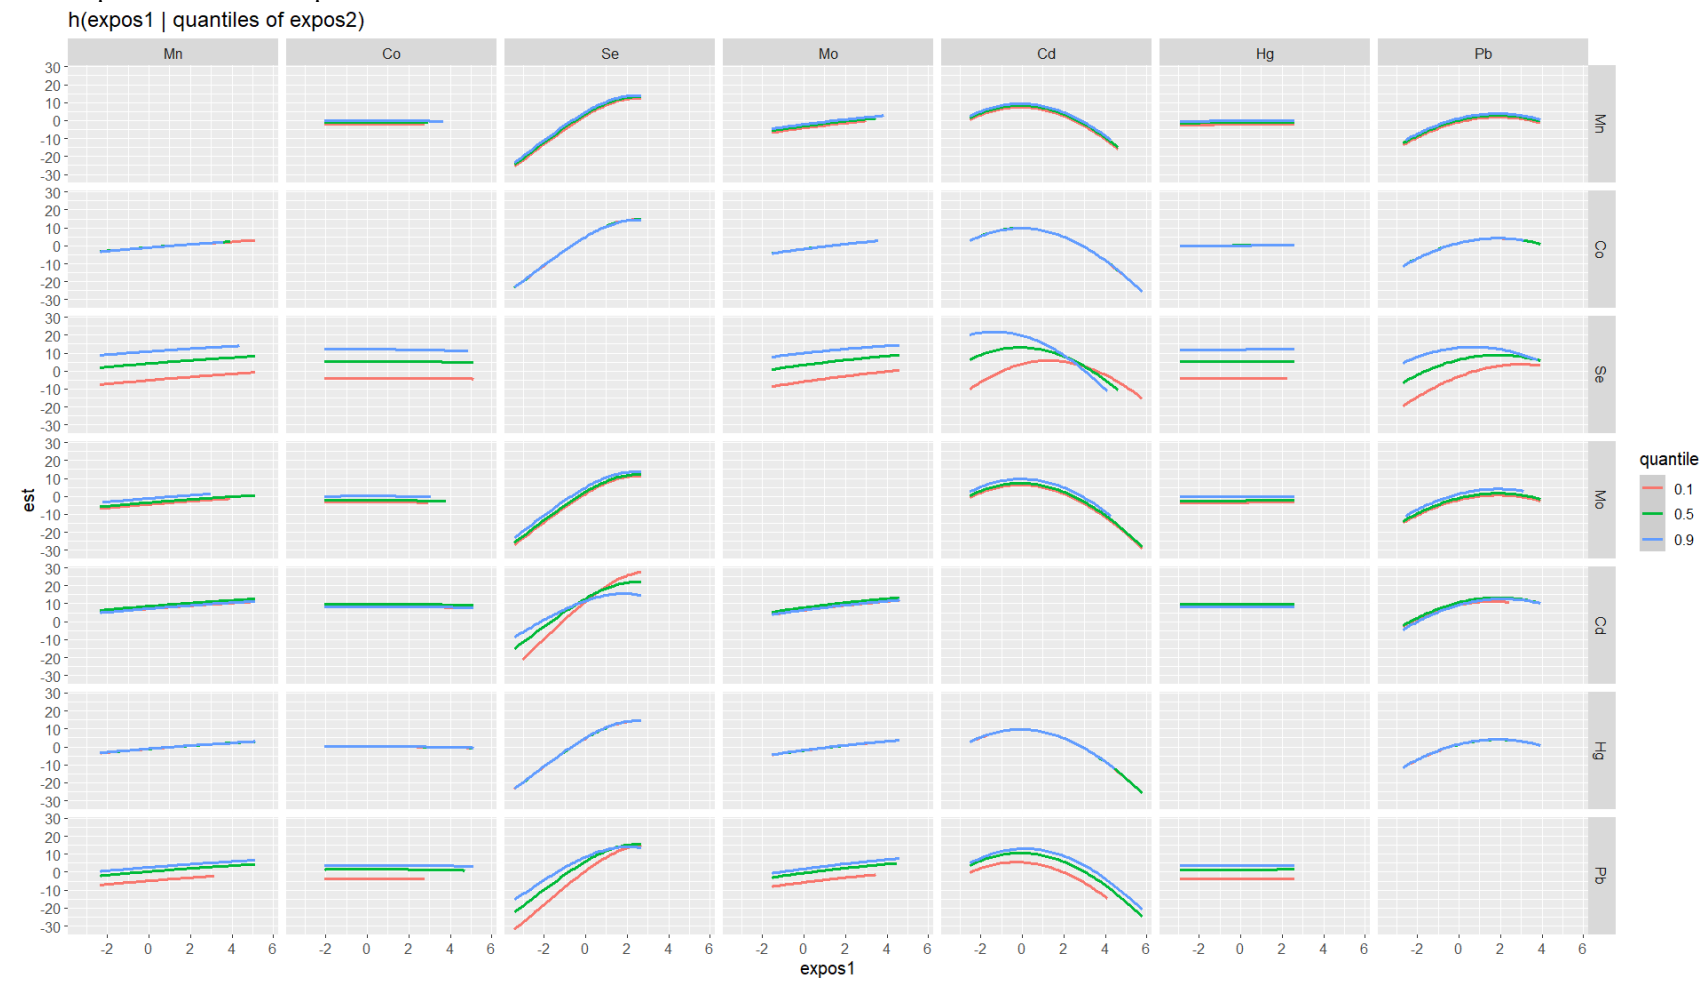

Abbreviations: Mn, manganese; Co, cobalt; Se, selenium; Mo, molybdenum; Cd, cadmium; Hg, mercury; Pb, lead. All models were adjusted for maternal education, child sex, child secondhand smoke exposure at 4 years of age, child fish/seafood intake, and egg intake at 4 years of age.

Figure S13. Joint associations of the metals with low-density lipoprotein cholesterol at 4 years of age estimated by BKMR additionally adjusting for egg intake (n=291)

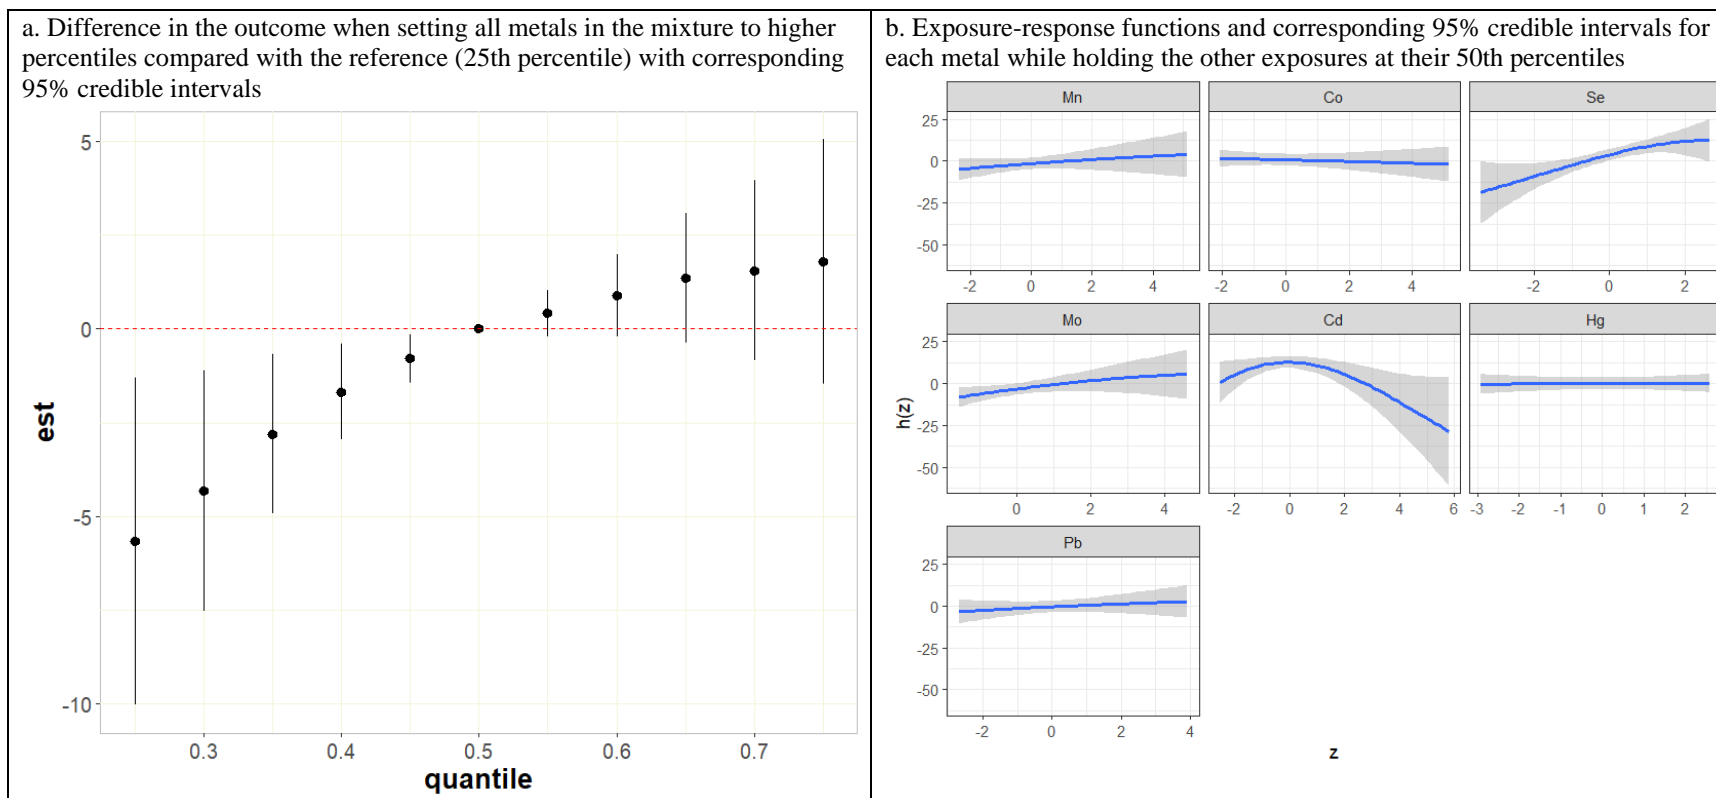

c. Exposure-response function for each metal exposure (column) with the second exposure (row) fixed at its 10<sup>th</sup>, 50<sup>th</sup>, and 90<sup>th</sup> percentiles, while holding the other exposures at their 50<sup>th</sup> percentiles

$h(\text{expos1} \mid \text{quantiles of expos2})$

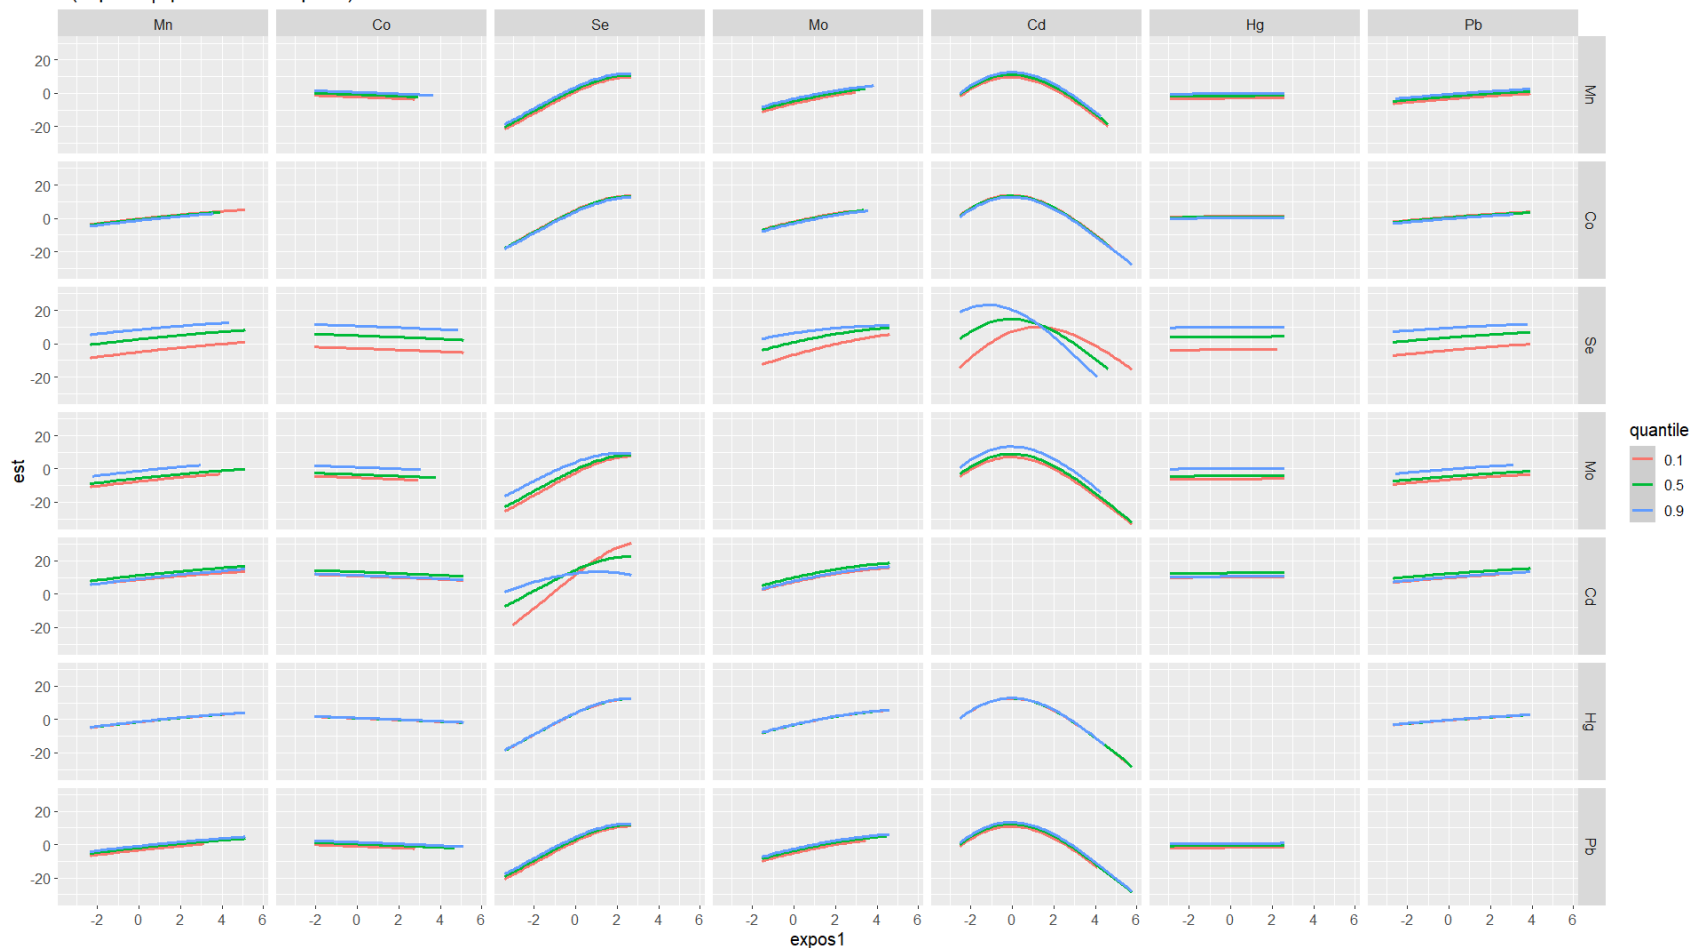

Abbreviations: Mn, manganese; Co, cobalt; Se, selenium; Mo, molybdenum; Cd, cadmium; Hg, mercury; Pb, lead. All models were adjusted for maternal education, child sex, child secondhand smoke exposure at 4 years of age, child fish/seafood intake, and egg intake at 4 years of age.

Figure S14. Joint associations of the metals with high-density lipoprotein cholesterol at 4 years of age estimated by BKMR additionally adjusting for egg intake (n=291)

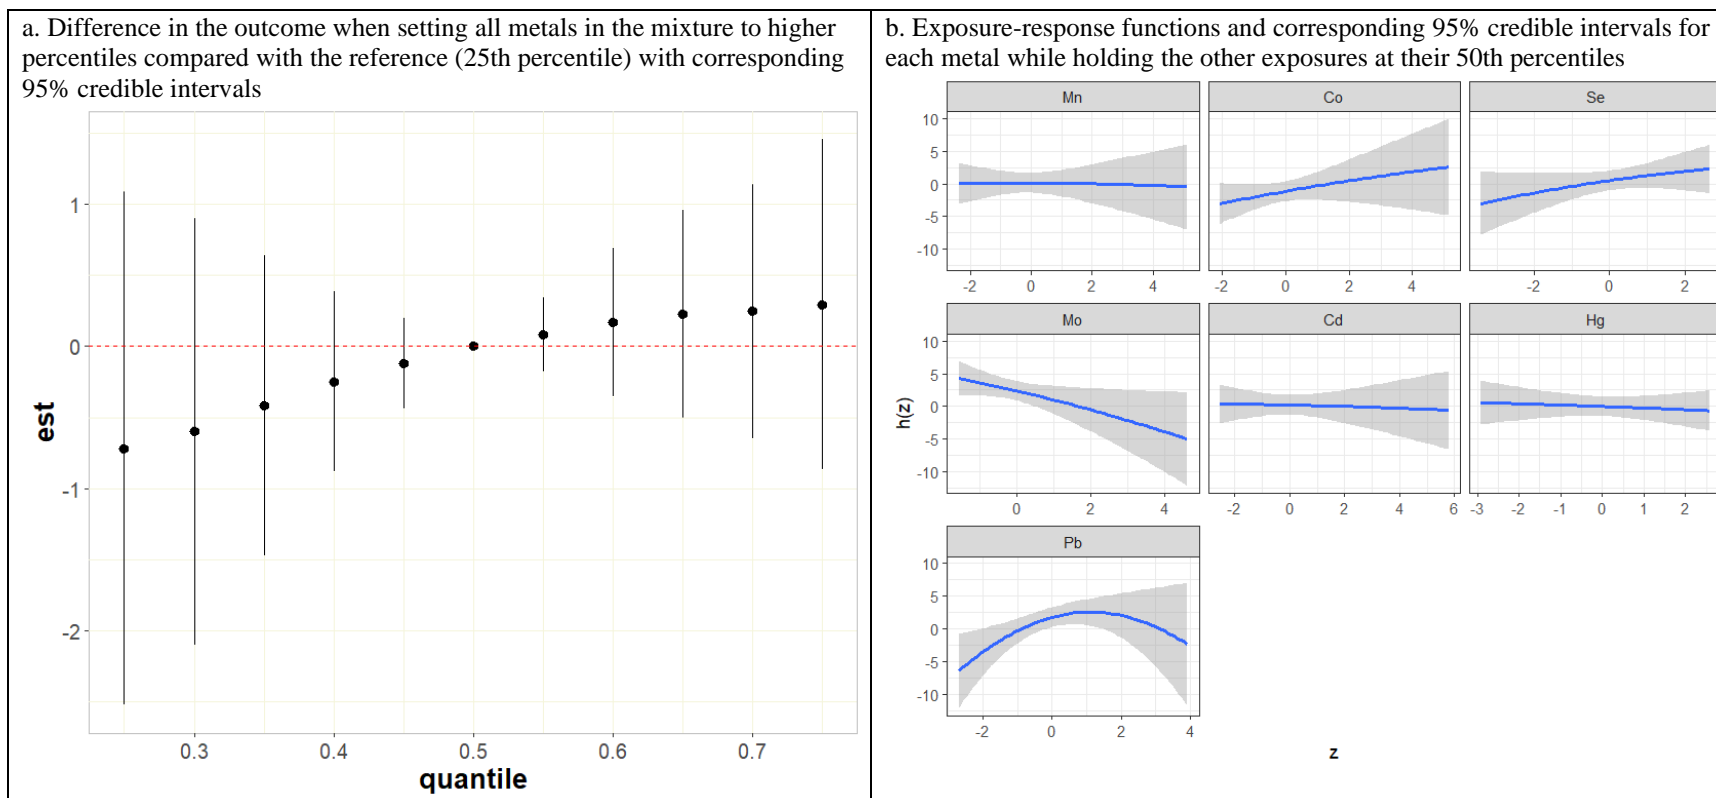

c. Exposure-response function for each metal exposure (column) with the second exposure (row) fixed at its 10<sup>th</sup>, 50<sup>th</sup>, and 90<sup>th</sup> percentiles, while holding the other exposures at their 50<sup>th</sup> percentiles

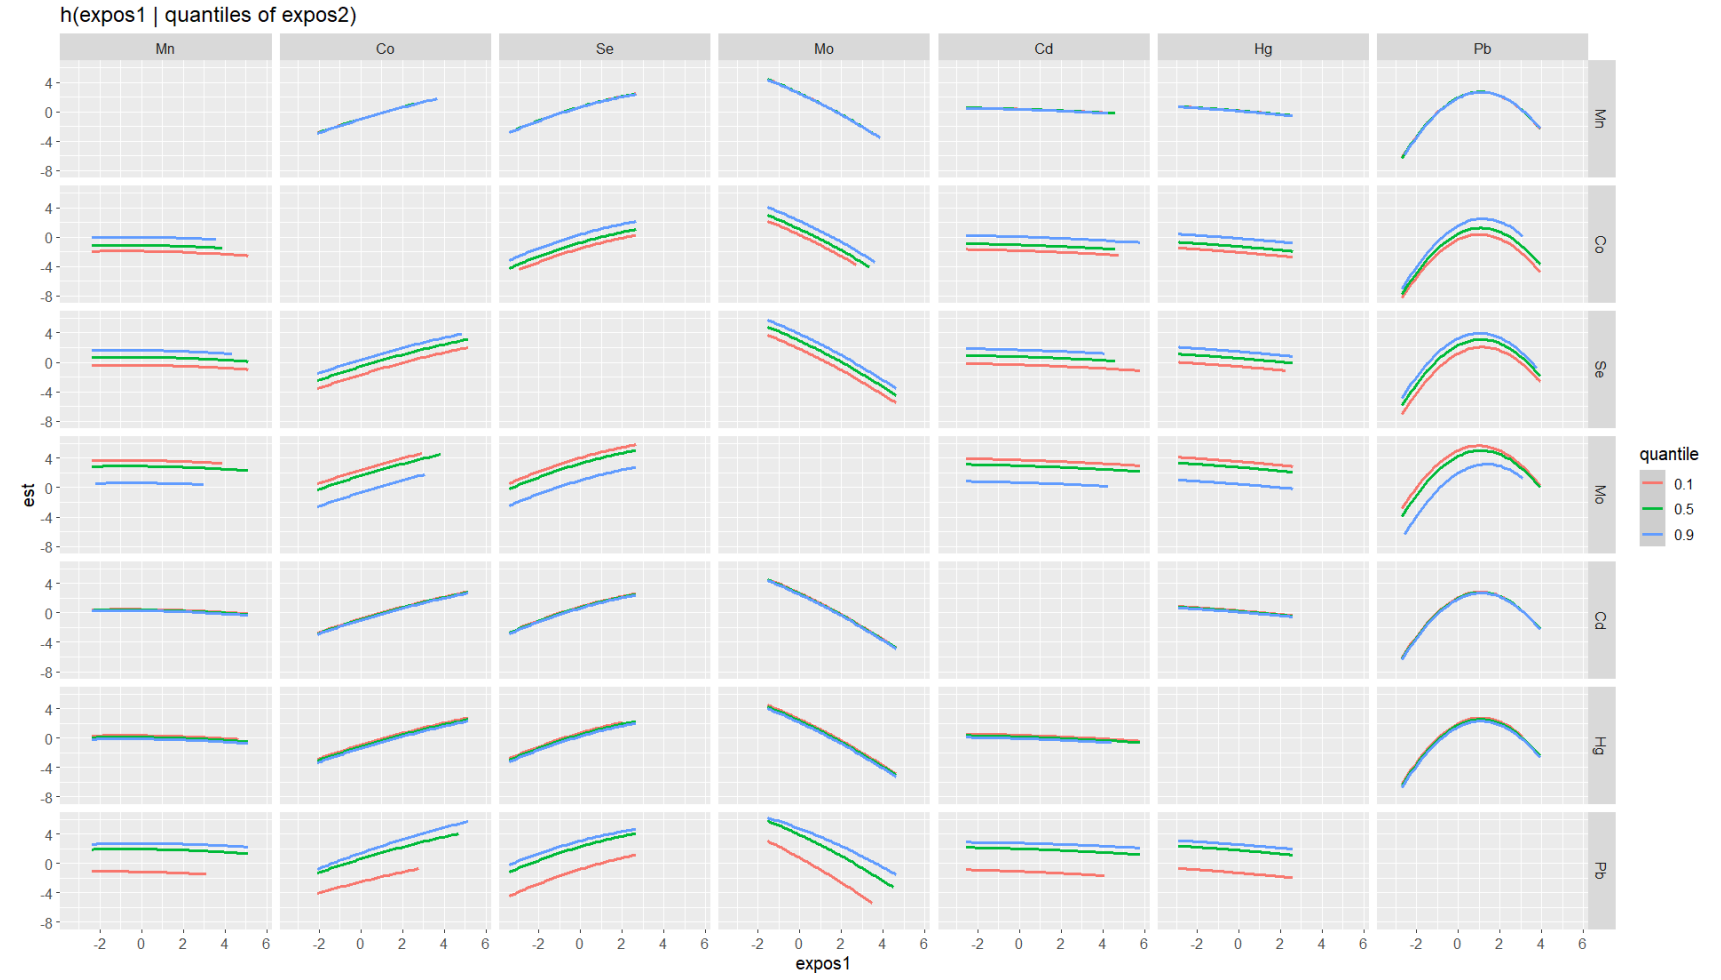

Abbreviations: Mn, manganese; Co, cobalt; Se, selenium; Mo, molybdenum; Cd, cadmium; Hg, mercury; Pb, lead. All models were adjusted for maternal education, child sex, child secondhand smoke exposure at 4 years of age, child fish/seafood intake, and egg intake at 4 years of age.

Figure S15. Joint associations of the metals with triglycerides at 4 years of age estimated by BKMR additionally adjusting for egg intake (n=291)

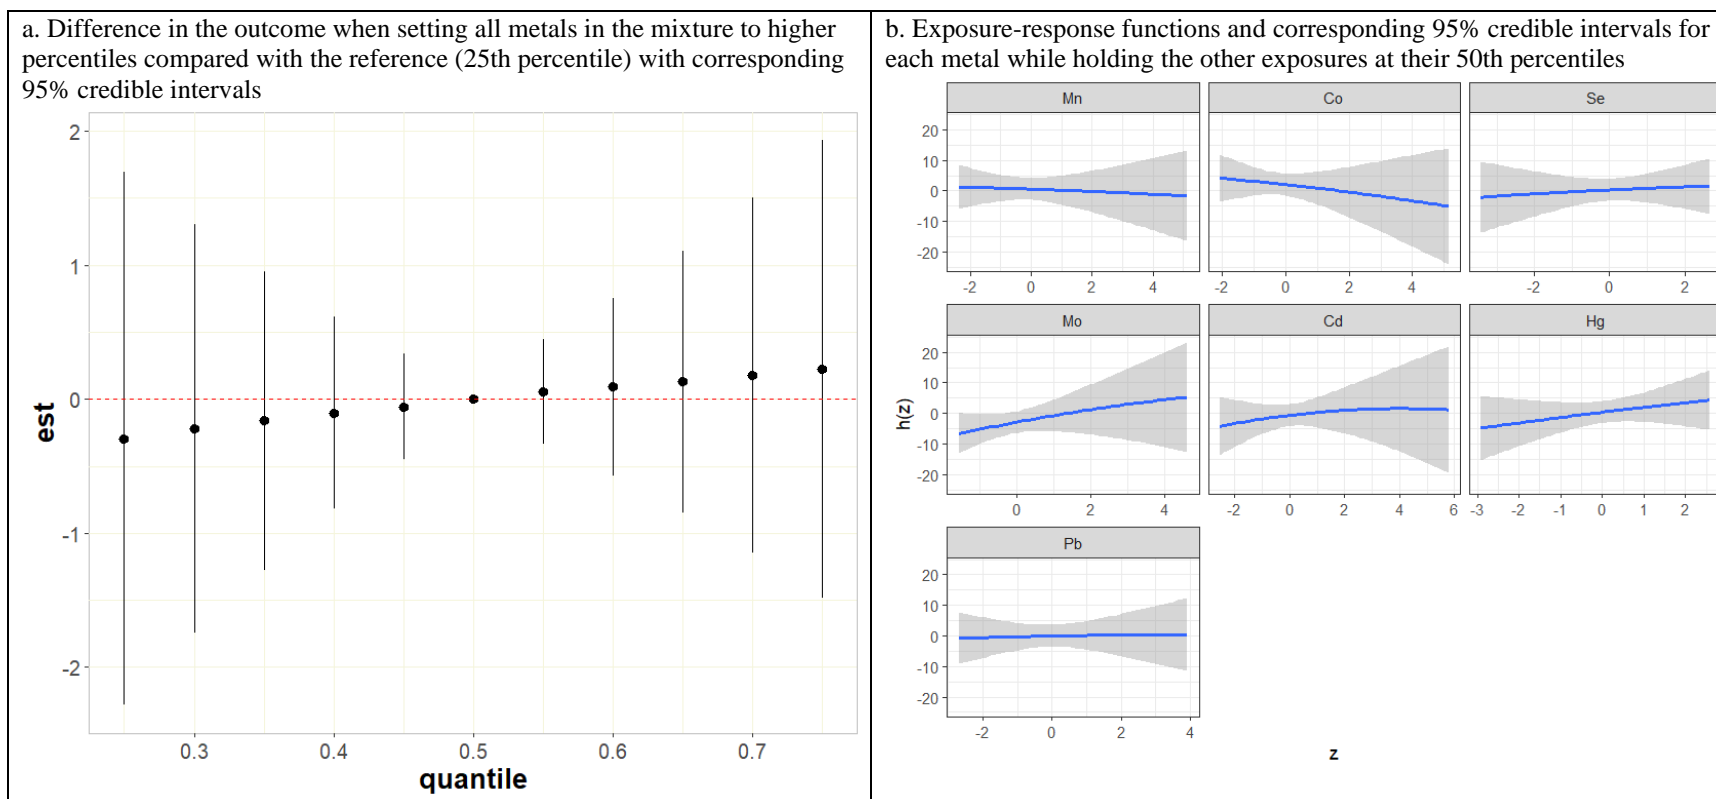

c. Exposure-response function for each metal exposure (column) with the second exposure (row) fixed at its 10<sup>th</sup>, 50<sup>th</sup>, and 90<sup>th</sup> percentiles, while holding the other exposures at their 50<sup>th</sup> percentiles

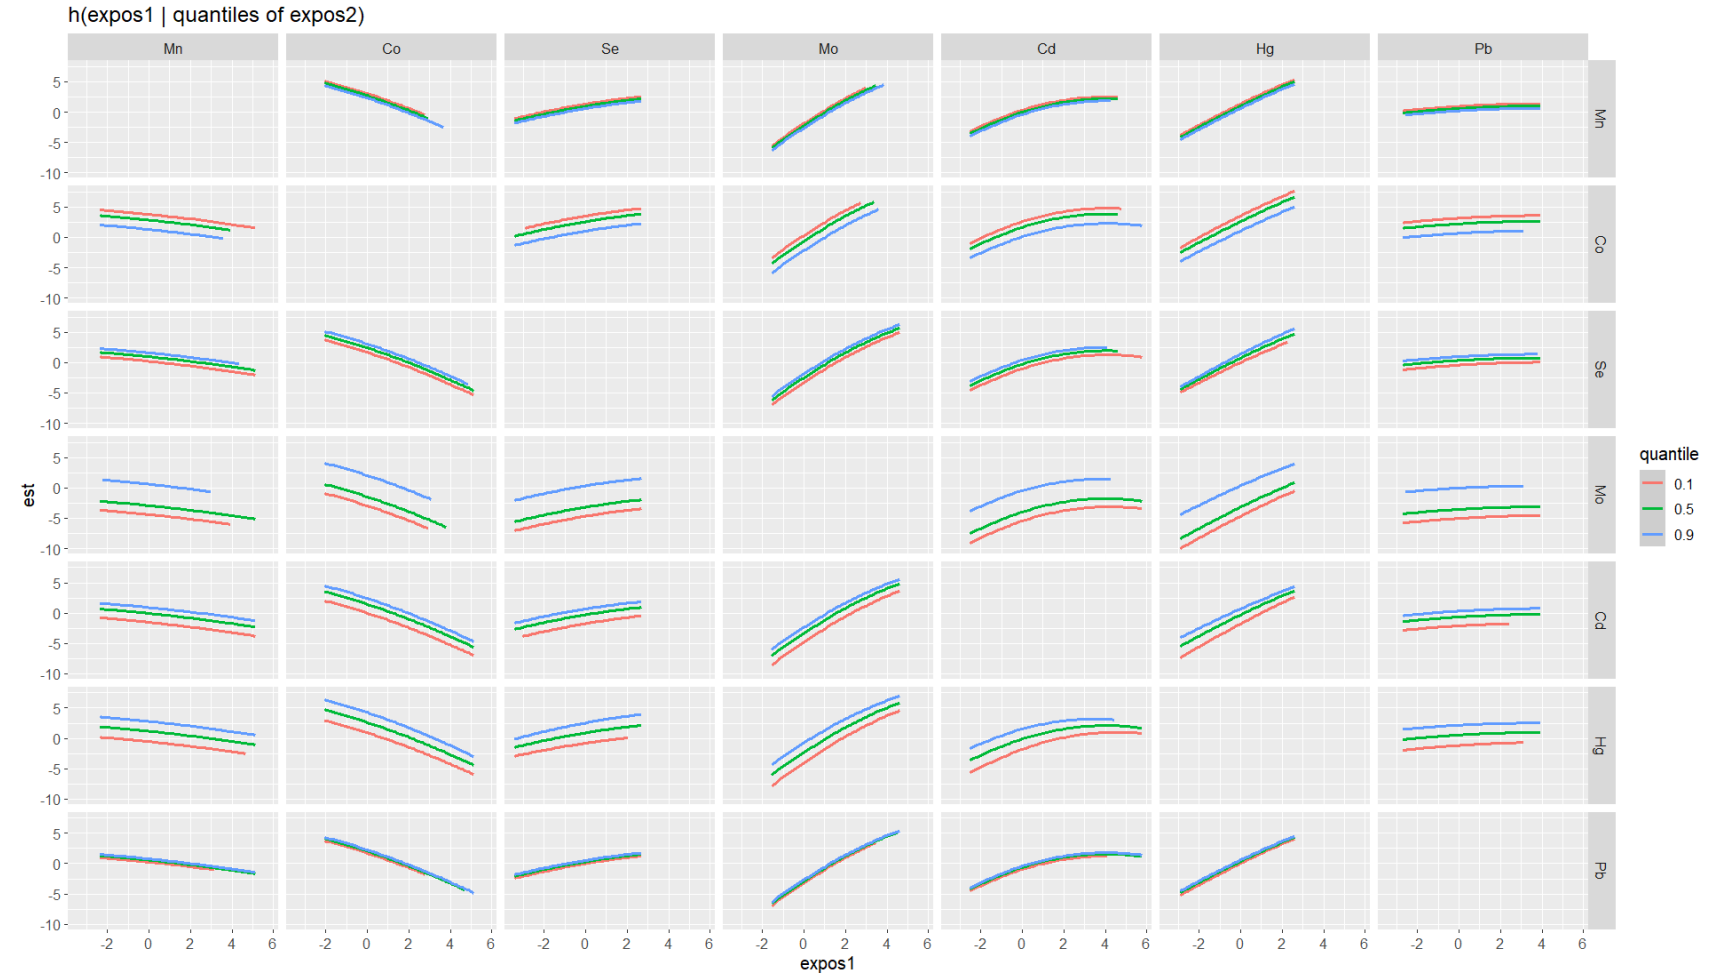

Abbreviations: Mn, manganese; Co, cobalt; Se, selenium; Mo, molybdenum; Cd, cadmium; Hg, mercury; Pb, lead. All models were adjusted for maternal education, child sex, child secondhand smoke exposure at 4 years of age, child fish/seafood intake, and egg intake at 4 years of age.

Table S9. Difference in lipid measure levels setting all metals (Co, Mn, Mo, Se, Cd, Hg, and Pb) to their 75<sup>th</sup> compared with 25<sup>th</sup> percentile concentrations and holding all other metals in the mixture at their median values, estimated by BKMR additionally adjusting for dairy intake (n=291)

| <b>Lipid measure</b>                         | <b>75<sup>th</sup> vs. 25<sup>th</sup> percentiles</b> |
|----------------------------------------------|--------------------------------------------------------|
| Total cholesterol (mg/dL)                    | 9.60 (0.50, 18.70)                                     |
| Low-density lipoprotein cholesterol (mg/dL)  | 8.44 (1.60, 15.29)                                     |
| High-density lipoprotein cholesterol (mg/dL) | 1.21 (-1.60, 4.02)                                     |
| Triglycerides (mg/dL)                        | 0.59 (-3.39, 4.57)                                     |

All models were adjusted for maternal education, child sex, child secondhand smoke exposure at 4 years of age, child fish/seafood intake, and dairy intake at 4 years of age.



Table S10. Posterior inclusion probabilities (PIP) and effect estimates for each metal, holding all other metals in the mixture constant at their median values, in association with lipid measures at 4 years of age, estimated by BKMR additionally adjusting for dairy intake (n=291)

| Exposure | Total cholesterol |                                                                | Low-density lipoprotein cholesterol |                                                                | High-density lipoprotein cholesterol |                                                                | Triglycerides |                                                                |
|----------|-------------------|----------------------------------------------------------------|-------------------------------------|----------------------------------------------------------------|--------------------------------------|----------------------------------------------------------------|---------------|----------------------------------------------------------------|
|          | PIP               | 75 <sup>th</sup> vs. 25 <sup>th</sup> percentiles <sup>a</sup> | PIP                                 | 75 <sup>th</sup> vs. 25 <sup>th</sup> percentiles <sup>a</sup> | PIP                                  | 75 <sup>th</sup> vs. 25 <sup>th</sup> percentiles <sup>a</sup> | PIP           | 75 <sup>th</sup> vs. 25 <sup>th</sup> percentiles <sup>a</sup> |
| Mn       | 0.02              | 0.04 (-0.89, 0.97)                                             | 0.06                                | 0.08 (-1.20, 1.35)                                             | <0.01                                | <-0.01 (-0.13, 0.13)                                           | 0.05          | 0.02 (-1.00, 1.03)                                             |
| Co       | 0.02              | 0.03 (-0.84, 0.89)                                             | 0.01                                | <-0.01 (-0.46, 0.45)                                           | 0.07                                 | -0.01 (-0.64, 0.62)                                            | 0.05          | 0.02 (-1.27, 1.31)                                             |
| Se       | 0.94              | 9.18 (1.58, 16.78)                                             | 0.98                                | 9.07 (3.21, 14.93)                                             | 0.04                                 | 0.04 (-0.46, 0.54)                                             | 0.04          | 0.06 (-1.35, 1.47)                                             |
| Mo       | 0.04              | 0.10 (-1.34, 1.55)                                             | 0.26                                | 1.03 (-3.11, 5.17)                                             | 0.09                                 | -0.19 (-1.55, 1.18)                                            | 0.07          | 0.21 (-1.79, 2.21)                                             |
| Cd       | 0.52              | 1.96 (-3.39, 7.31)                                             | 0.85                                | 2.99 (-1.95, 7.93)                                             | <0.01                                | <-0.01 (-0.12, 0.12)                                           | 0.08          | 0.28 (-2.15, 2.71)                                             |
| Hg       | 0.01              | 0.01 (-0.53, 0.54)                                             | 0.01                                | <0.01 (-0.49, 0.50)                                            | 0.01                                 | <-0.01 (-0.18, 0.18)                                           | 0.13          | 0.33 (-2.35, 3.02)                                             |
| Pb       | 0.23              | 1.17 (-3.91, 6.25)                                             | 0.03                                | 0.08 (-1.19, 1.35)                                             | 0.54                                 | 1.09 (-1.50, 3.68)                                             | 0.04          | <0.01 (-1.13, 1.13)                                            |

<sup>a</sup> The difference in the lipid measure when setting each metal component to its 75<sup>th</sup> percentile versus 25<sup>th</sup> percentile, while holding all other metals constant at their median values.

Abbreviations: Mn, manganese; Co, cobalt; Se, selenium; Mo, molybdenum; Cd, cadmium; Hg, mercury; Pb, lead. All models were adjusted for maternal education, child sex, child secondhand smoke exposure at 4 years of age, child fish/seafood intake, and dairy intake at 4 years of age.

Figure S16. Joint associations of the metals with total cholesterol at 4 years of age estimated by BKMR additionally adjusting for dairy intake (n=291)

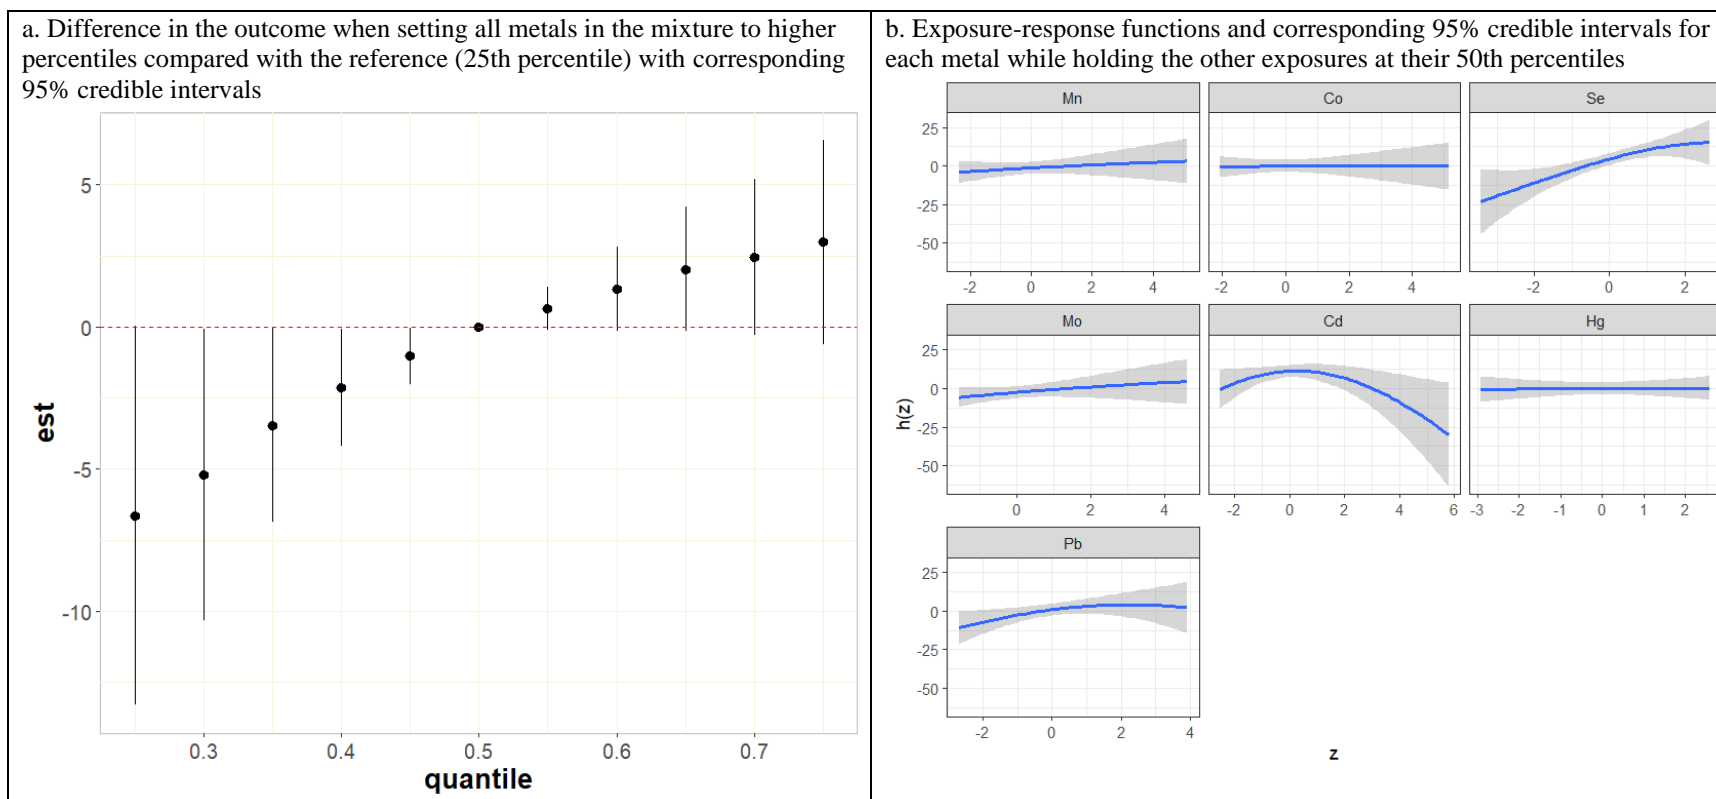

c. Exposure-response function for each metal exposure (column) with the second exposure (row) fixed at its 10<sup>th</sup>, 50<sup>th</sup>, and 90<sup>th</sup> percentiles, while holding the other exposures at their 50<sup>th</sup> percentiles

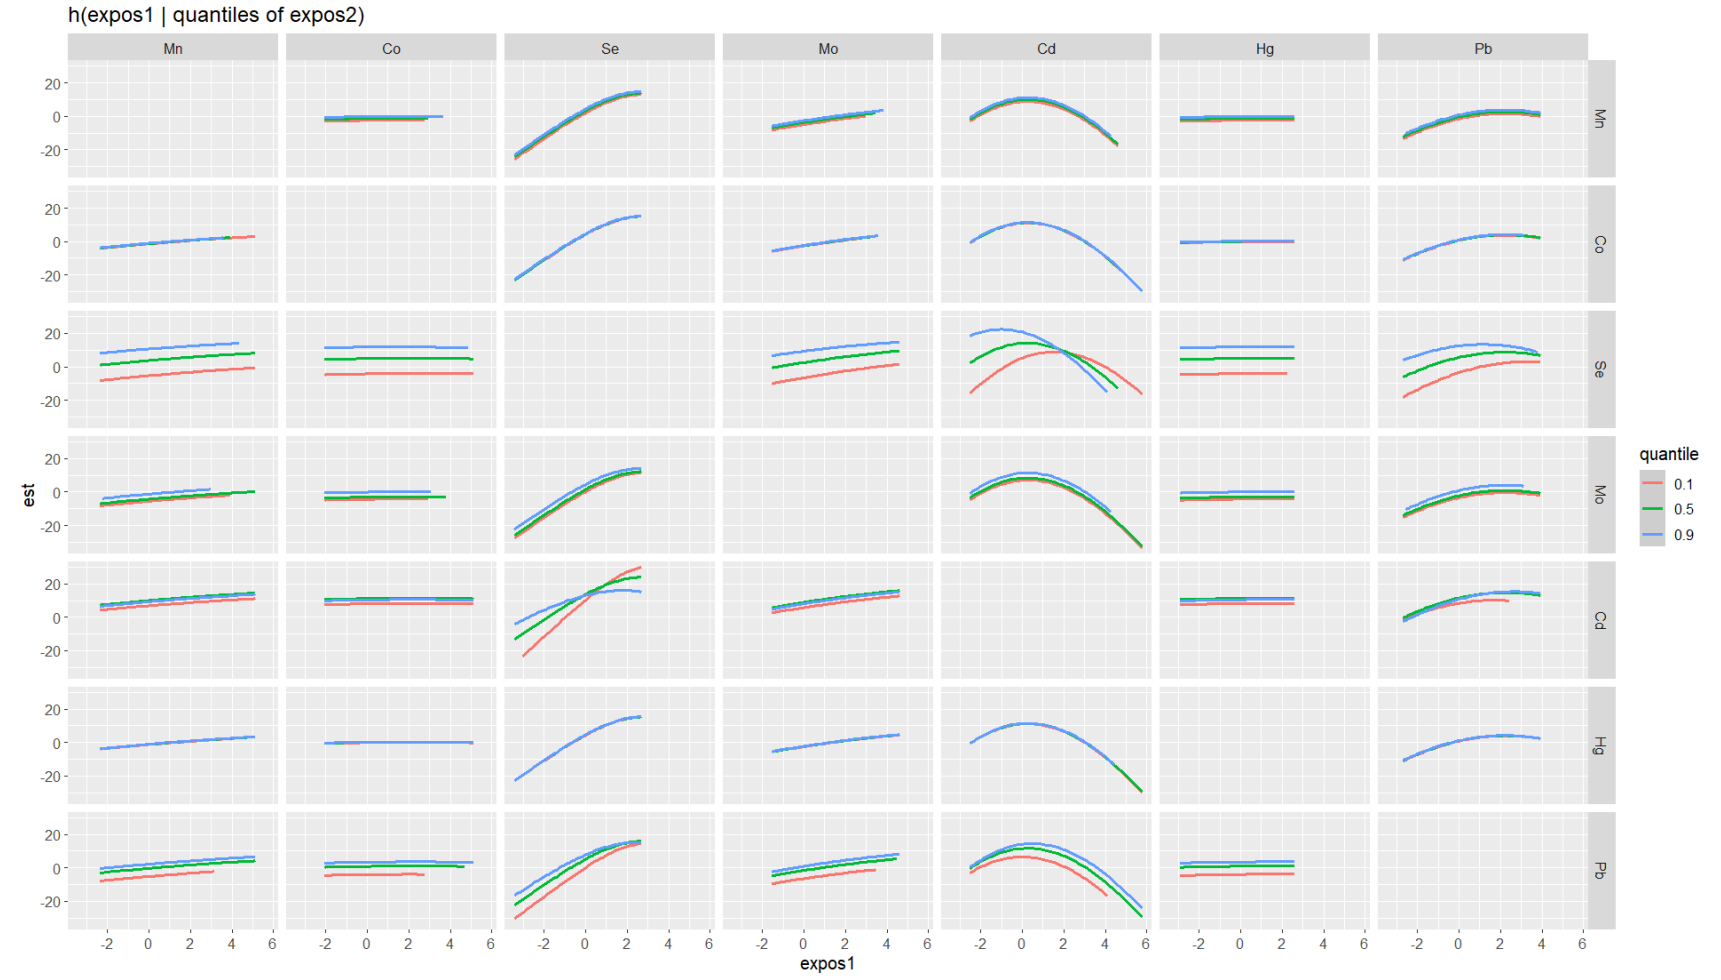

Abbreviations: Mn, manganese; Co, cobalt; Se, selenium; Mo, molybdenum; Cd, cadmium; Hg, mercury; Pb, lead. All models were adjusted for maternal education, child sex, child secondhand smoke exposure at 4 years of age, child fish/seafood intake, and dairy intake at 4 years of age.

Figure S17. Joint associations of the metals with low-density lipoprotein cholesterol at 4 years of age estimated by BKMR additionally adjusting for dairy intake (n=291)

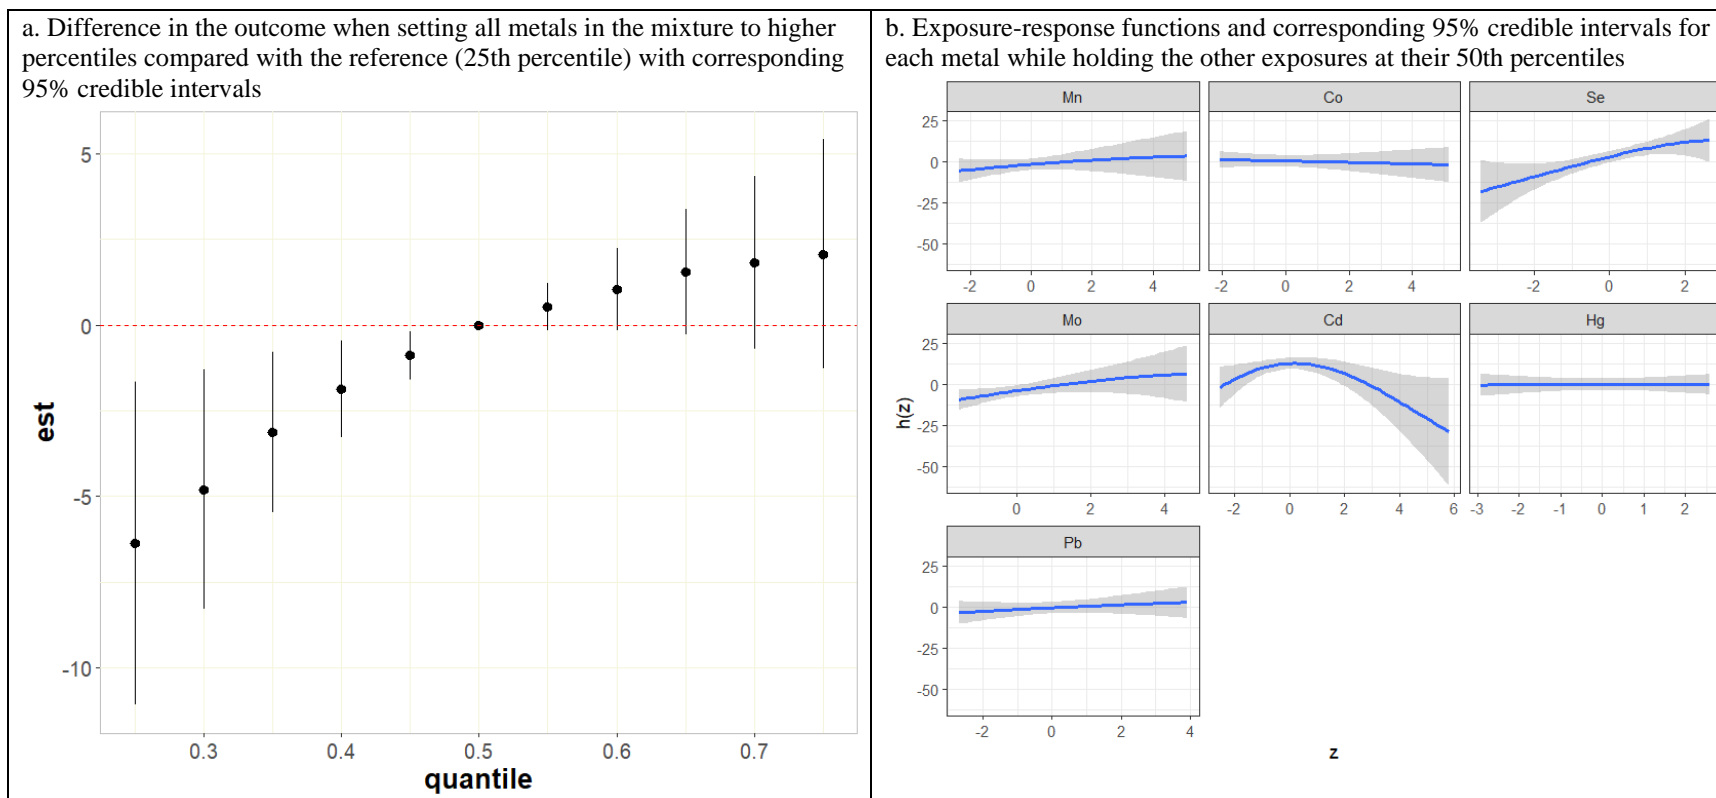

c. Exposure-response function for each metal exposure (column) with the second exposure (row) fixed at its 10<sup>th</sup>, 50<sup>th</sup>, and 90<sup>th</sup> percentiles, while holding the other exposures at their 50<sup>th</sup> percentiles

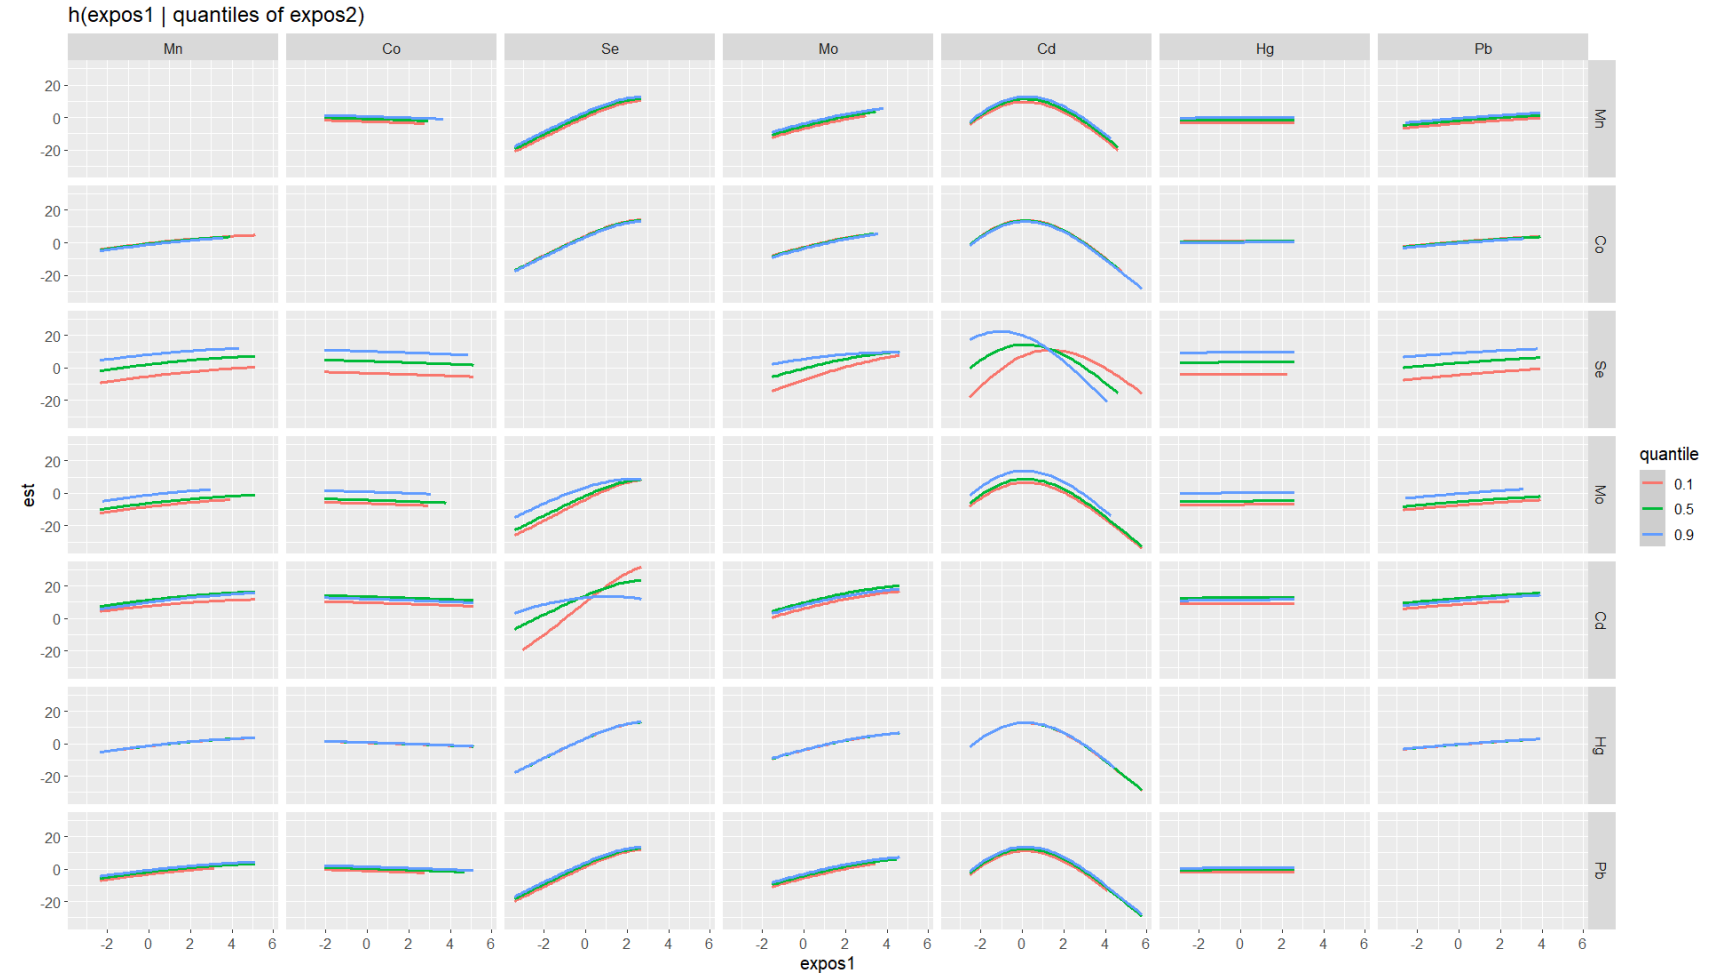

Abbreviations: Mn, manganese; Co, cobalt; Se, selenium; Mo, molybdenum; Cd, cadmium; Hg, mercury; Pb, lead. All models were adjusted for maternal education, child sex, child secondhand smoke exposure at 4 years of age, child fish/seafood intake, and dairy intake at 4 years of age.

Figure S18. Joint associations of the metals with high-density lipoprotein cholesterol at 4 years of age estimated by BKMR additionally adjusting for dairy intake (n=291)

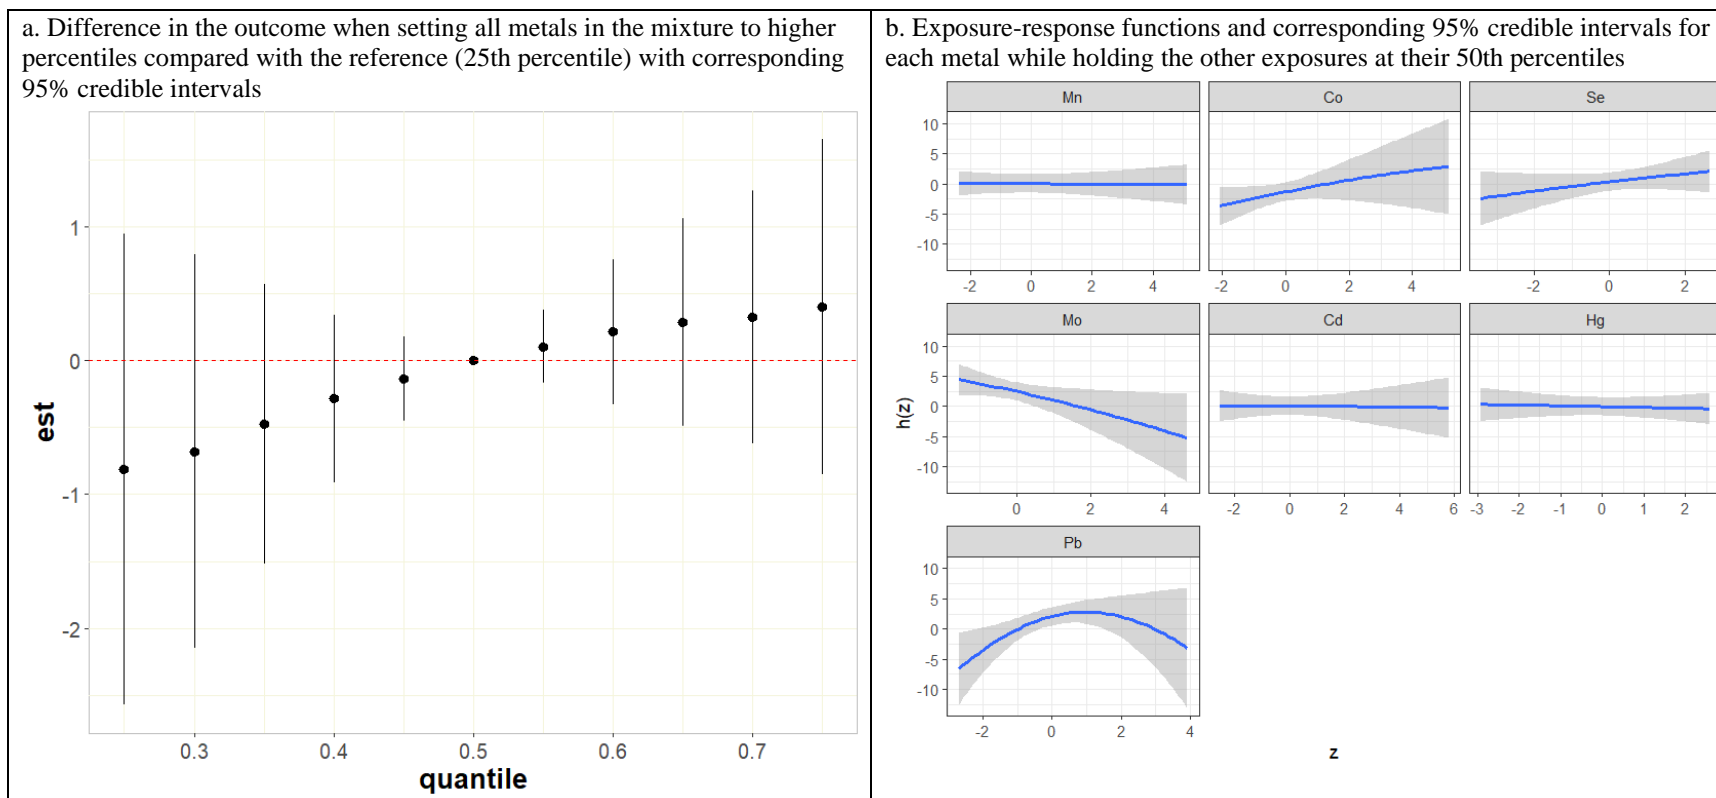

c. Exposure-response function for each metal exposure (column) with the second exposure (row) fixed at its 10<sup>th</sup>, 50<sup>th</sup>, and 90<sup>th</sup> percentiles, while holding the other exposures at their 50<sup>th</sup> percentiles

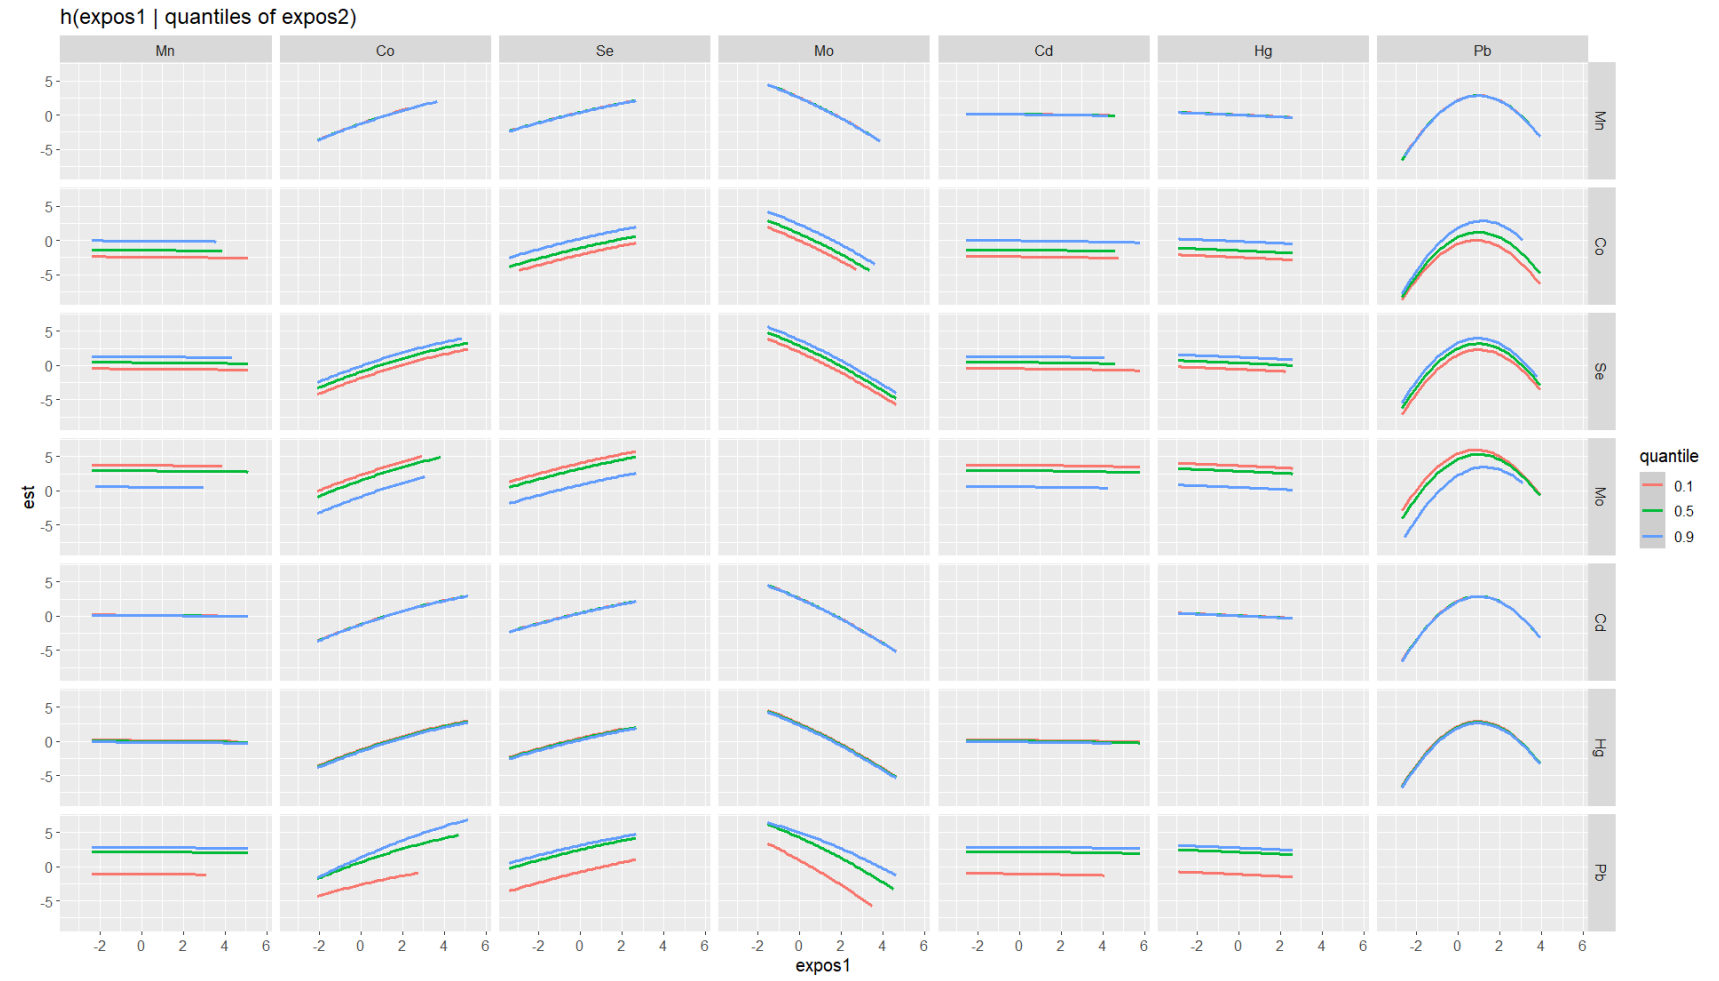

Abbreviations: Mn, manganese; Co, cobalt; Se, selenium; Mo, molybdenum; Cd, cadmium; Hg, mercury; Pb, lead. All models were adjusted for maternal education, child sex, child secondhand smoke exposure at 4 years of age, child fish/seafood intake, and dairy intake at 4 years of age.

Figure S19. Joint associations of the metals with triglycerides at 4 years of age estimated by BKMR additionally adjusting for dairy intake (n=291)

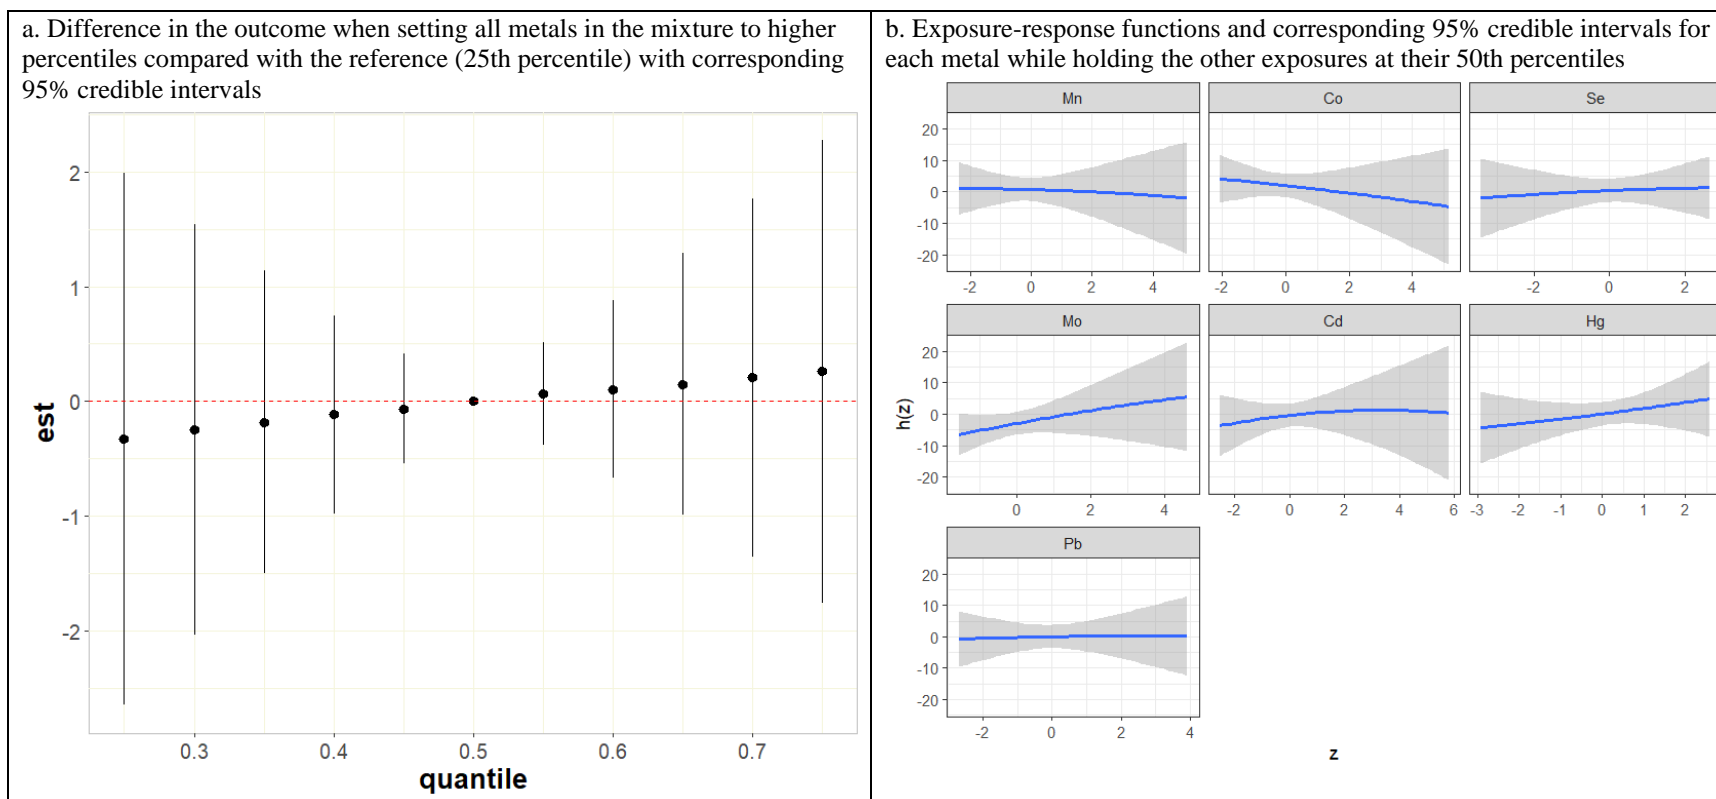



c. Exposure-response function for each metal exposure (column) with the second exposure (row) fixed at its 10<sup>th</sup>, 50<sup>th</sup>, and 90<sup>th</sup> percentiles, while holding the other exposures at their 50<sup>th</sup> percentiles

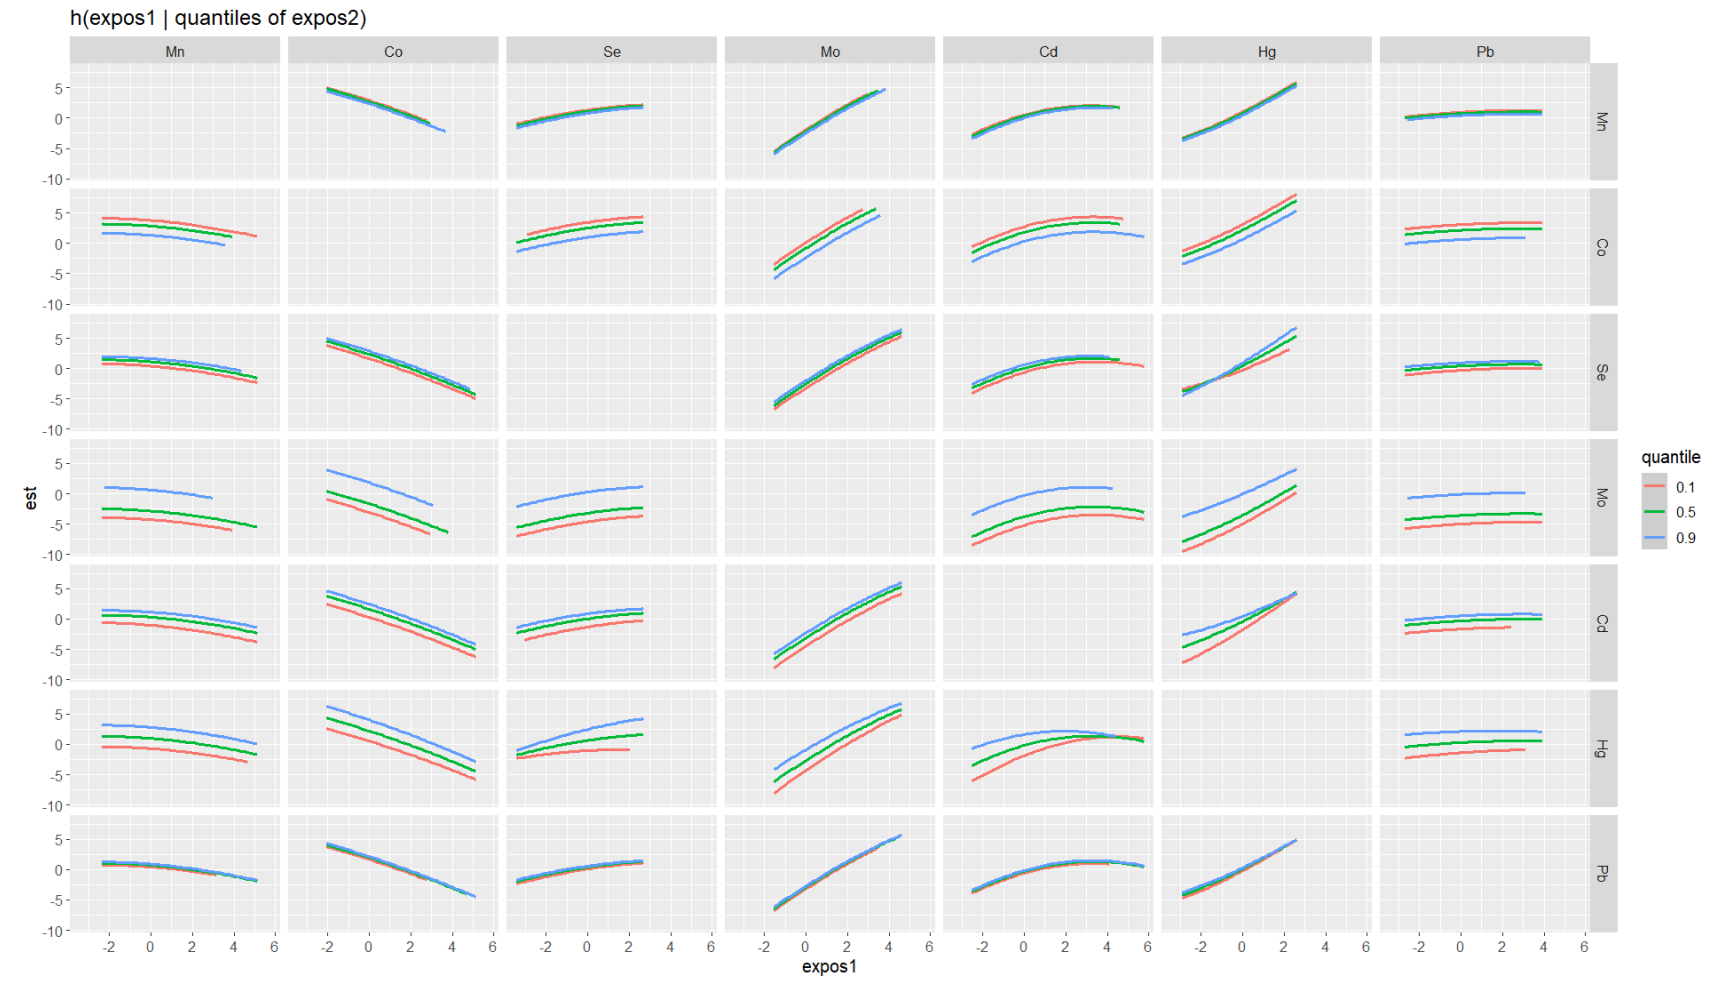

Abbreviations: Mn, manganese; Co, cobalt; Se, selenium; Mo, molybdenum; Cd, cadmium; Hg, mercury; Pb, lead. All models were adjusted for maternal education, child sex, child secondhand smoke exposure at 4 years of age, child fish/seafood intake, and dairy intake at 4 years of age.

Table S11. Difference in lipid measure levels setting all metals (Co, Mn, Mo, Se, Cd, Hg, and Pb) to their 75<sup>th</sup> compared with 25<sup>th</sup> percentile concentrations and holding all other metals in the mixture at their median values, estimated by BKMR additionally adjusting for supplement use (n=291)

| <b>Lipid measure</b>                         | <b>75<sup>th</sup> vs. 25<sup>th</sup> percentiles</b> |
|----------------------------------------------|--------------------------------------------------------|
| Total cholesterol (mg/dL)                    | 8.24 (-0.03, 16.51)                                    |
| Low-density lipoprotein cholesterol (mg/dL)  | 7.14 (0.27, 14.01)                                     |
| High-density lipoprotein cholesterol (mg/dL) | 1.22 (-1.51, 3.95)                                     |
| Triglycerides (mg/dL)                        | 0.58 (-3.79, 4.95)                                     |

All models were adjusted for maternal education, child sex, child secondhand smoke exposure at 4 years of age, child fish/seafood intake, and supplement use at 4 years of age.

Table S12. Posterior inclusion probabilities (PIP) and effect estimates for each metal, holding all other metals in the mixture constant at their median values, in association with lipid measures at 4 years of age, estimated by BKMR additionally adjusting for supplement use (n=291)

| Exposure | Total cholesterol |                                                                | Low-density lipoprotein cholesterol |                                                                | High-density lipoprotein cholesterol |                                                                | Triglycerides |                                                                |
|----------|-------------------|----------------------------------------------------------------|-------------------------------------|----------------------------------------------------------------|--------------------------------------|----------------------------------------------------------------|---------------|----------------------------------------------------------------|
|          | PIP               | 75 <sup>th</sup> vs. 25 <sup>th</sup> percentiles <sup>a</sup> | PIP                                 | 75 <sup>th</sup> vs. 25 <sup>th</sup> percentiles <sup>a</sup> | PIP                                  | 75 <sup>th</sup> vs. 25 <sup>th</sup> percentiles <sup>a</sup> | PIP           | 75 <sup>th</sup> vs. 25 <sup>th</sup> percentiles <sup>a</sup> |
| Mn       | 0.01              | 0.02 (-0.62, 0.65)                                             | 0.05                                | 0.09 (-1.20, 1.38)                                             | 0.01                                 | <0.01 (-0.16, 0.16)                                            | 0.06          | -0.06 (-1.84, 1.71)                                            |
| Co       | <0.01             | <-0.01 (-0.29, 0.29)                                           | 0.03                                | -0.02 (-0.83, 0.80)                                            | 0.04                                 | -0.02 (-0.55, 0.51)                                            | 0.04          | -0.01 (-1.10, 1.07)                                            |
| Se       | 0.91              | 8.21 (0.55, 15.87)                                             | 0.93                                | 8.25 (1.63, 14.87)                                             | 0.03                                 | 0.03 (-0.46, 0.52)                                             | 0.04          | 0.02 (-1.08, 1.13)                                             |
| Mo       | 0.04              | 0.11 (-1.38, 1.60)                                             | 0.16                                | 0.67 (-2.76, 4.10)                                             | 0.07                                 | -0.15 (-1.36, 1.07)                                            | 0.06          | 0.20 (-1.80, 2.20)                                             |
| Cd       | 0.28              | 0.80 (-2.92, 4.53)                                             | 0.73                                | 1.83 (-2.54, 6.20)                                             | 0.02                                 | <-0.01 (-0.27, 0.26)                                           | 0.15          | 0.50 (-2.81, 3.81)                                             |
| Hg       | <0.01             | 0 (0, 0)                                                       | <0.01                               | <0.01 (-0.24, 0.25)                                            | 0.03                                 | -0.01 (-0.33, 0.31)                                            | 0.17          | 0.52 (-3.07, 4.10)                                             |
| Pb       | 0.17              | 1.01 (-4.07, 6.09)                                             | 0.04                                | 0.13 (-1.48, 1.75)                                             | 0.57                                 | 1.18 (-1.43, 3.79)                                             | 0.06          | 0.02 (-1.42, 1.46)                                             |

<sup>a</sup> The difference in the lipid measure when setting each metal component to its 75<sup>th</sup> percentile versus 25<sup>th</sup> percentile, while holding all other metals constant at their median values.

Abbreviations: Mn, manganese; Co, cobalt; Se, selenium; Mo, molybdenum; Cd, cadmium; Hg, mercury; Pb, lead. All models were adjusted for maternal education, child sex, child secondhand smoke exposure at 4 years of age, child fish/seafood intake, and supplement use at 4 years of age.

Figure S20. Joint associations of the metals with total cholesterol at 4 years of age estimated by BKMR additionally adjusting for supplement use (n=291)

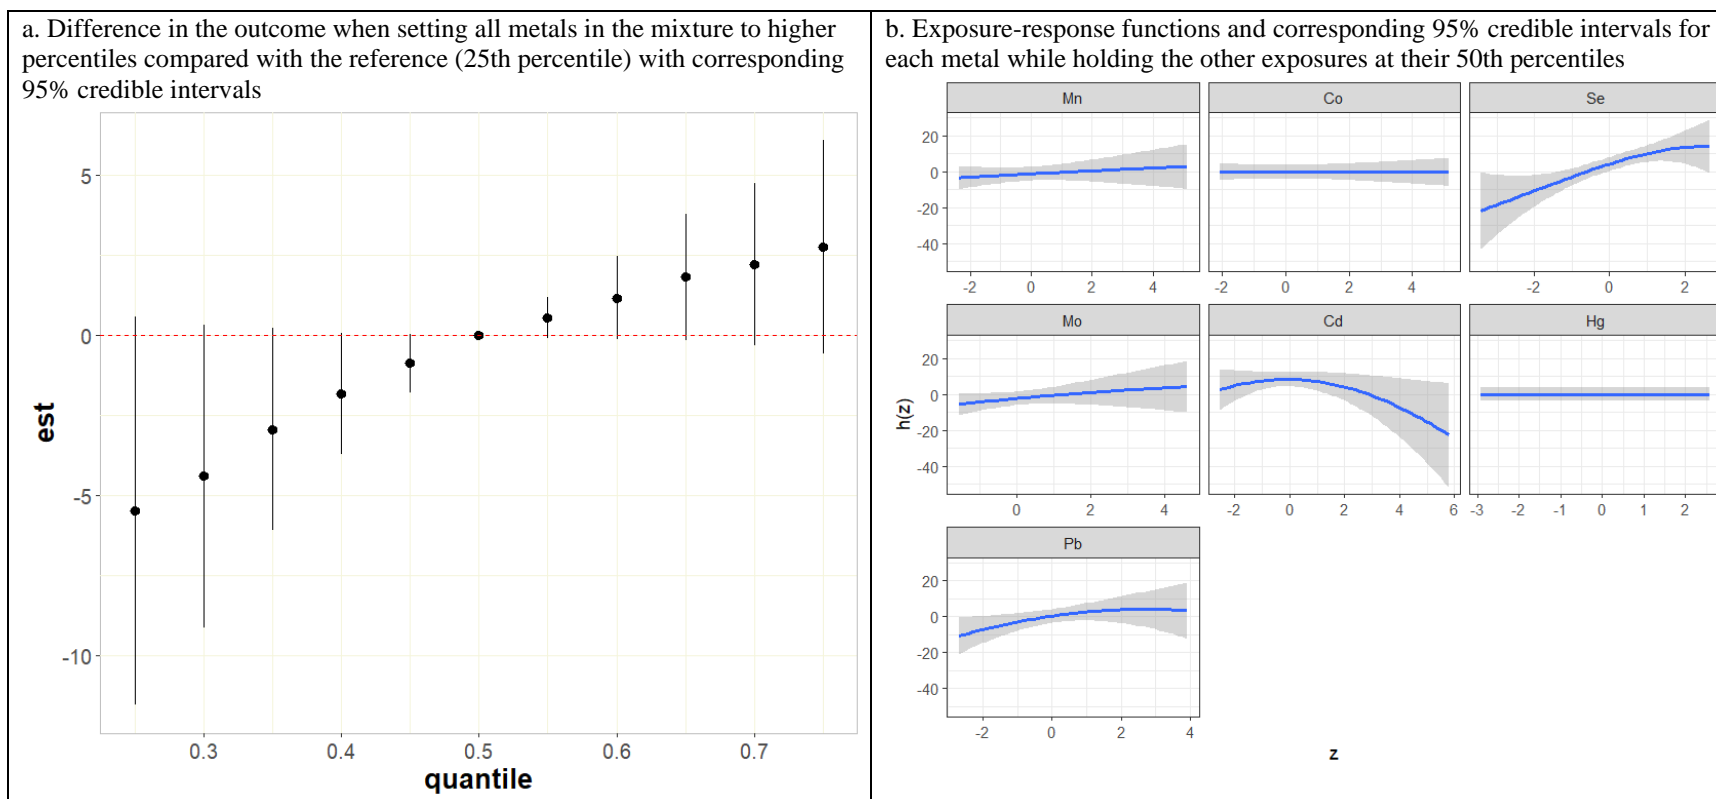

c. Exposure-response function for each metal exposure (column) with the second exposure (row) fixed at its 10<sup>th</sup>, 50<sup>th</sup>, and 90<sup>th</sup> percentiles, while holding the other exposures at their 50<sup>th</sup> percentiles

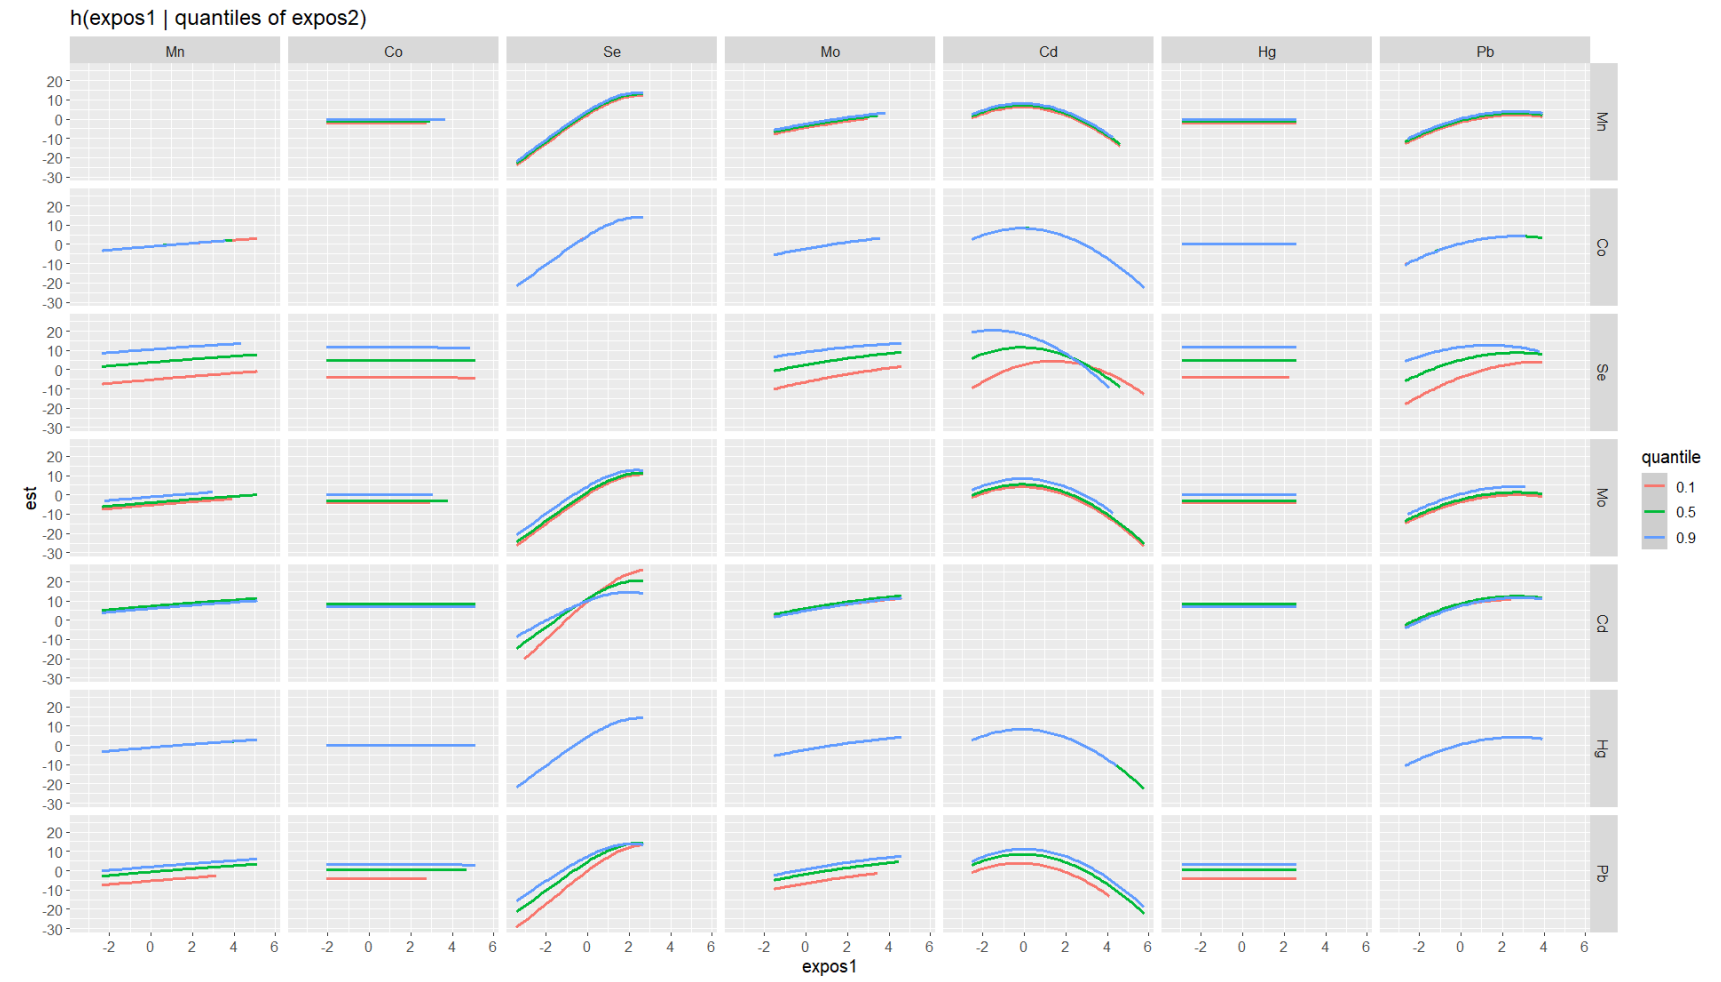

Abbreviations: Mn, manganese; Co, cobalt; Se, selenium; Mo, molybdenum; Cd, cadmium; Hg, mercury; Pb, lead. All models were adjusted for maternal education, child sex, child secondhand smoke exposure at 4 years of age, child fish/seafood intake, and supplement use at 4 years of age.

Figure S21. Joint associations of the metals with low-density lipoprotein cholesterol at 4 years of age estimated by BKMR additionally adjusting for supplement use (n=291)

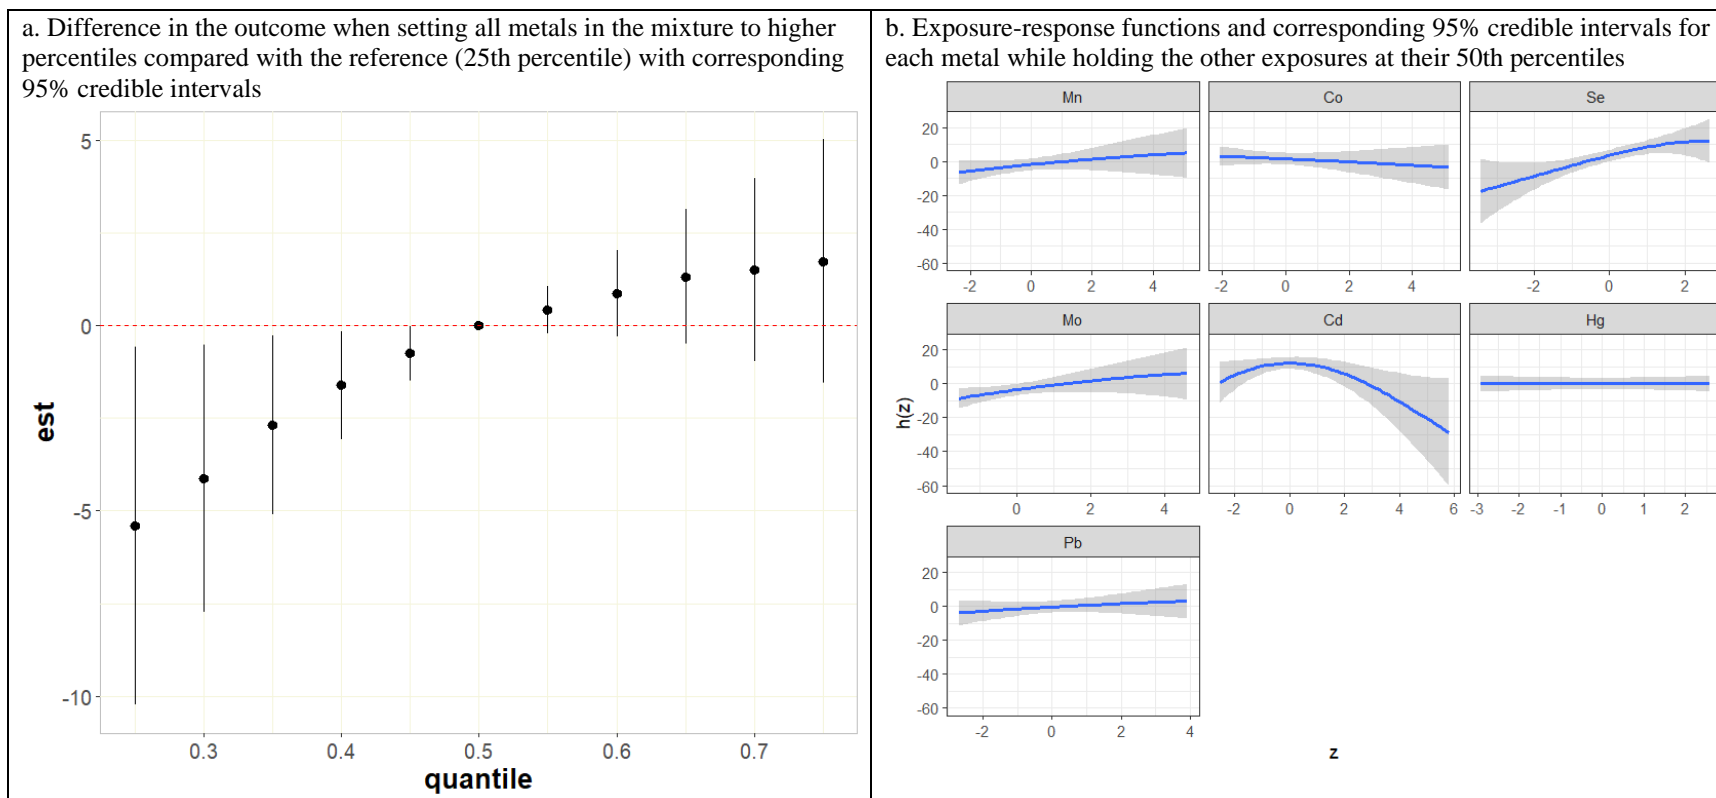

c. Exposure-response function for each metal exposure (column) with the second exposure (row) fixed at its 10<sup>th</sup>, 50<sup>th</sup>, and 90<sup>th</sup> percentiles, while holding the other exposures at their 50<sup>th</sup> percentiles

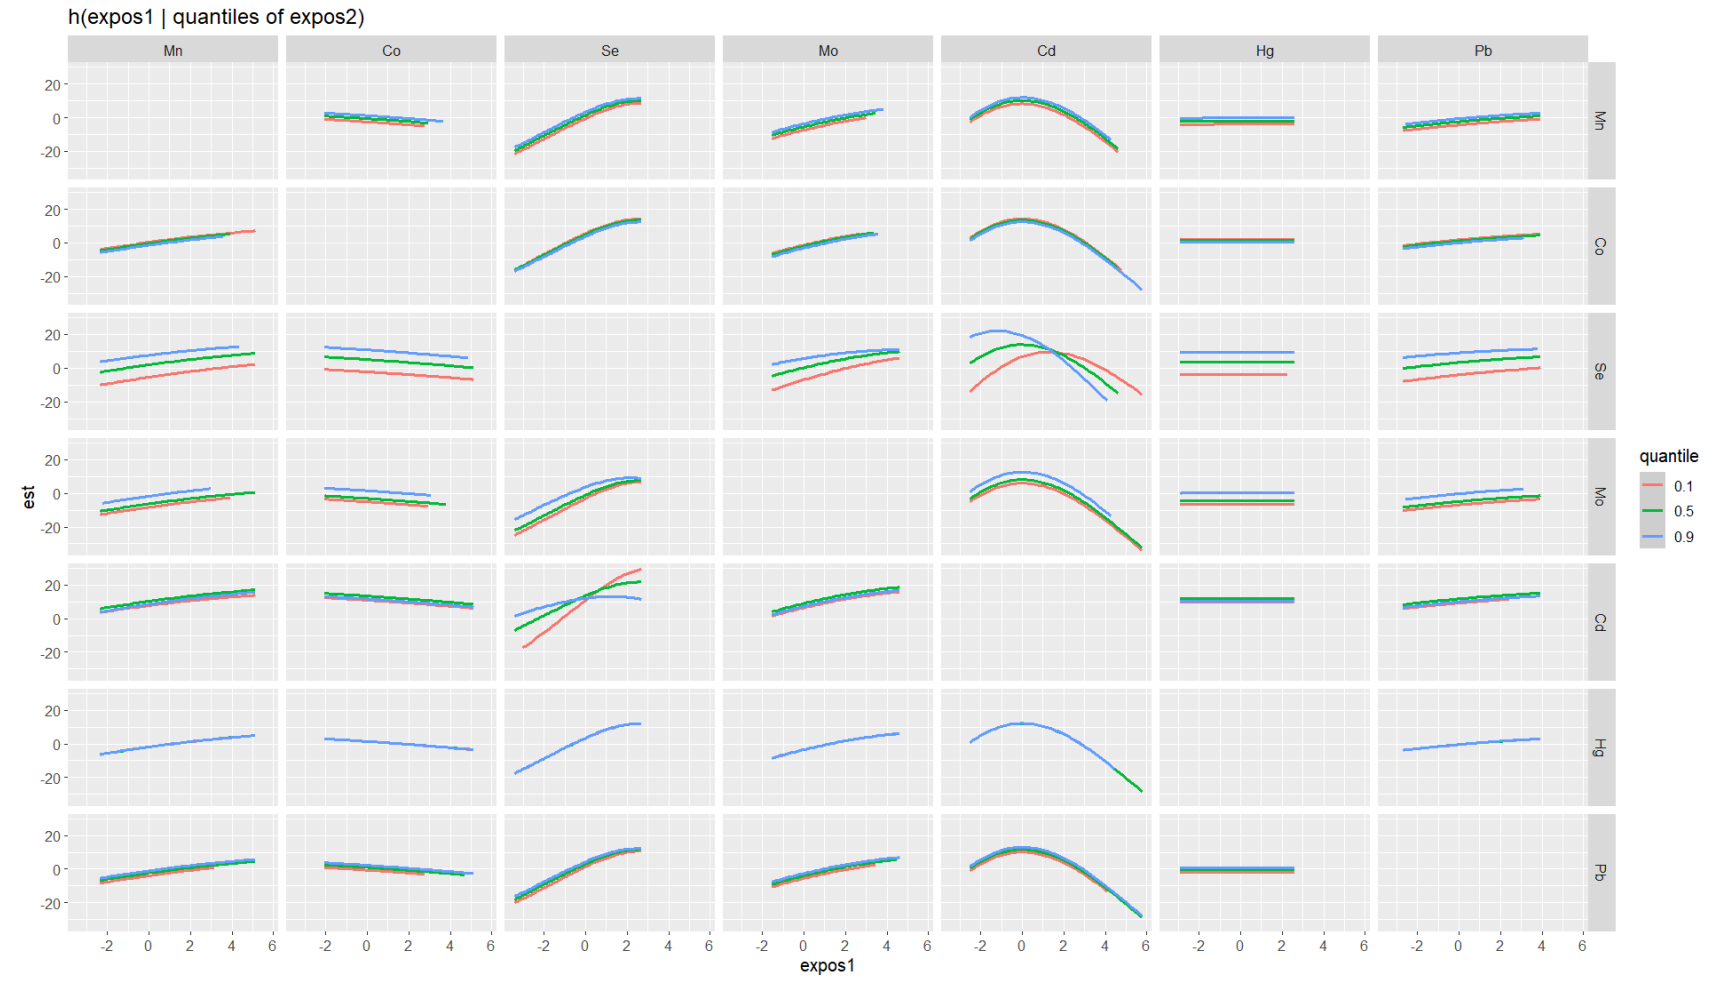

Abbreviations: Mn, manganese; Co, cobalt; Se, selenium; Mo, molybdenum; Cd, cadmium; Hg, mercury; Pb, lead. All models were adjusted for maternal education, child sex, child secondhand smoke exposure at 4 years of age, child fish/seafood intake, and supplement use at 4 years of age.

Figure S22. Joint associations of the metals with high-density lipoprotein cholesterol at 4 years of age estimated by BKMR additionally adjusting for supplement use (n=291)

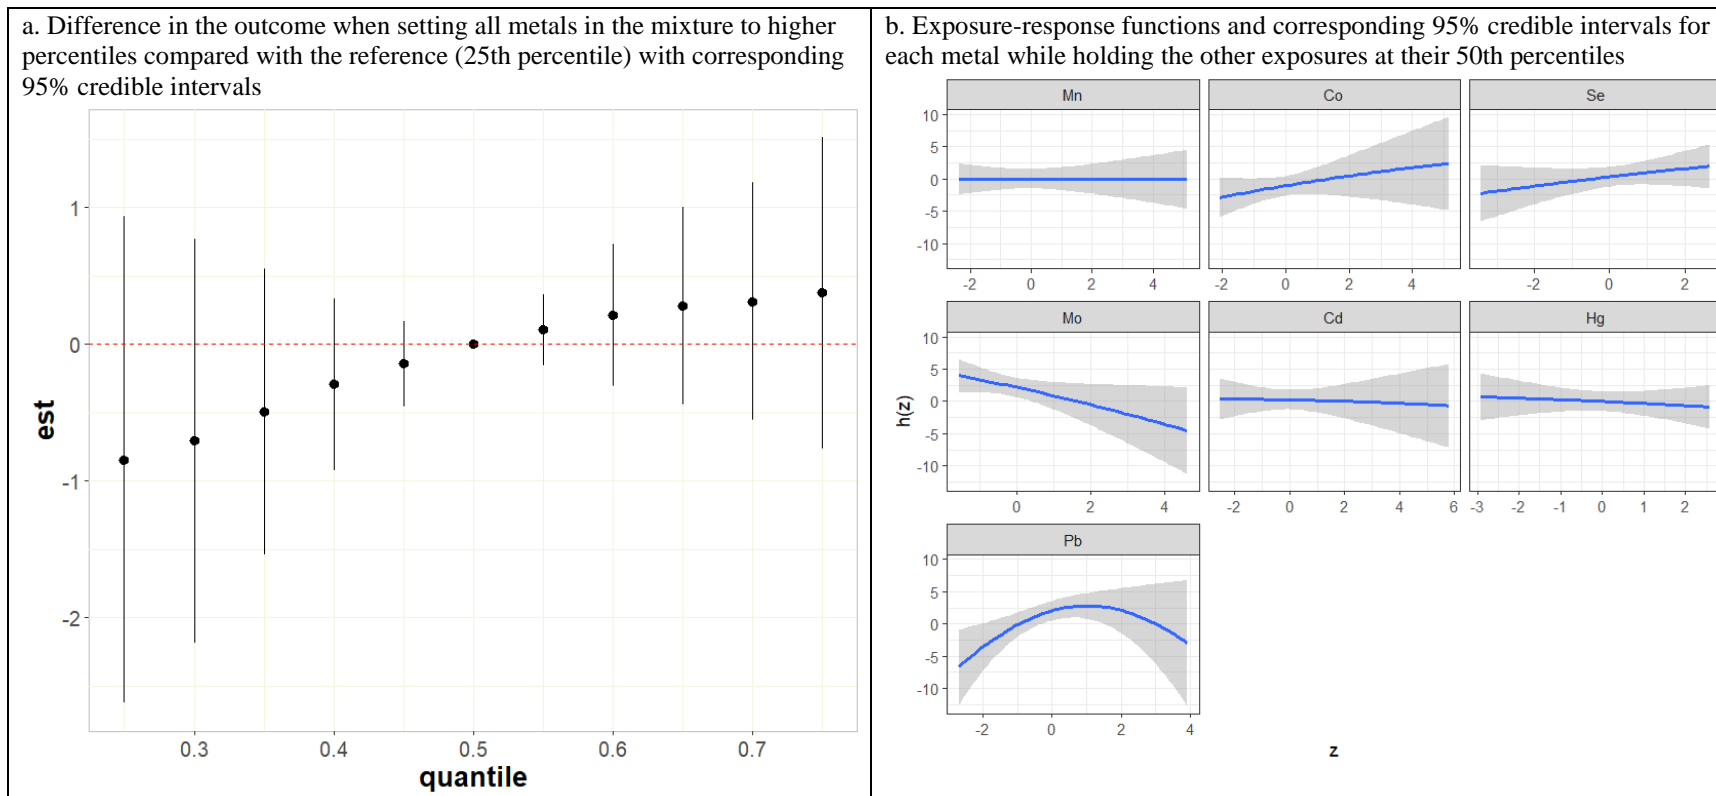



c. Exposure-response function for each metal exposure (column) with the second exposure (row) fixed at its 10<sup>th</sup>, 50<sup>th</sup>, and 90<sup>th</sup> percentiles, while holding the other exposures at their 50<sup>th</sup> percentiles

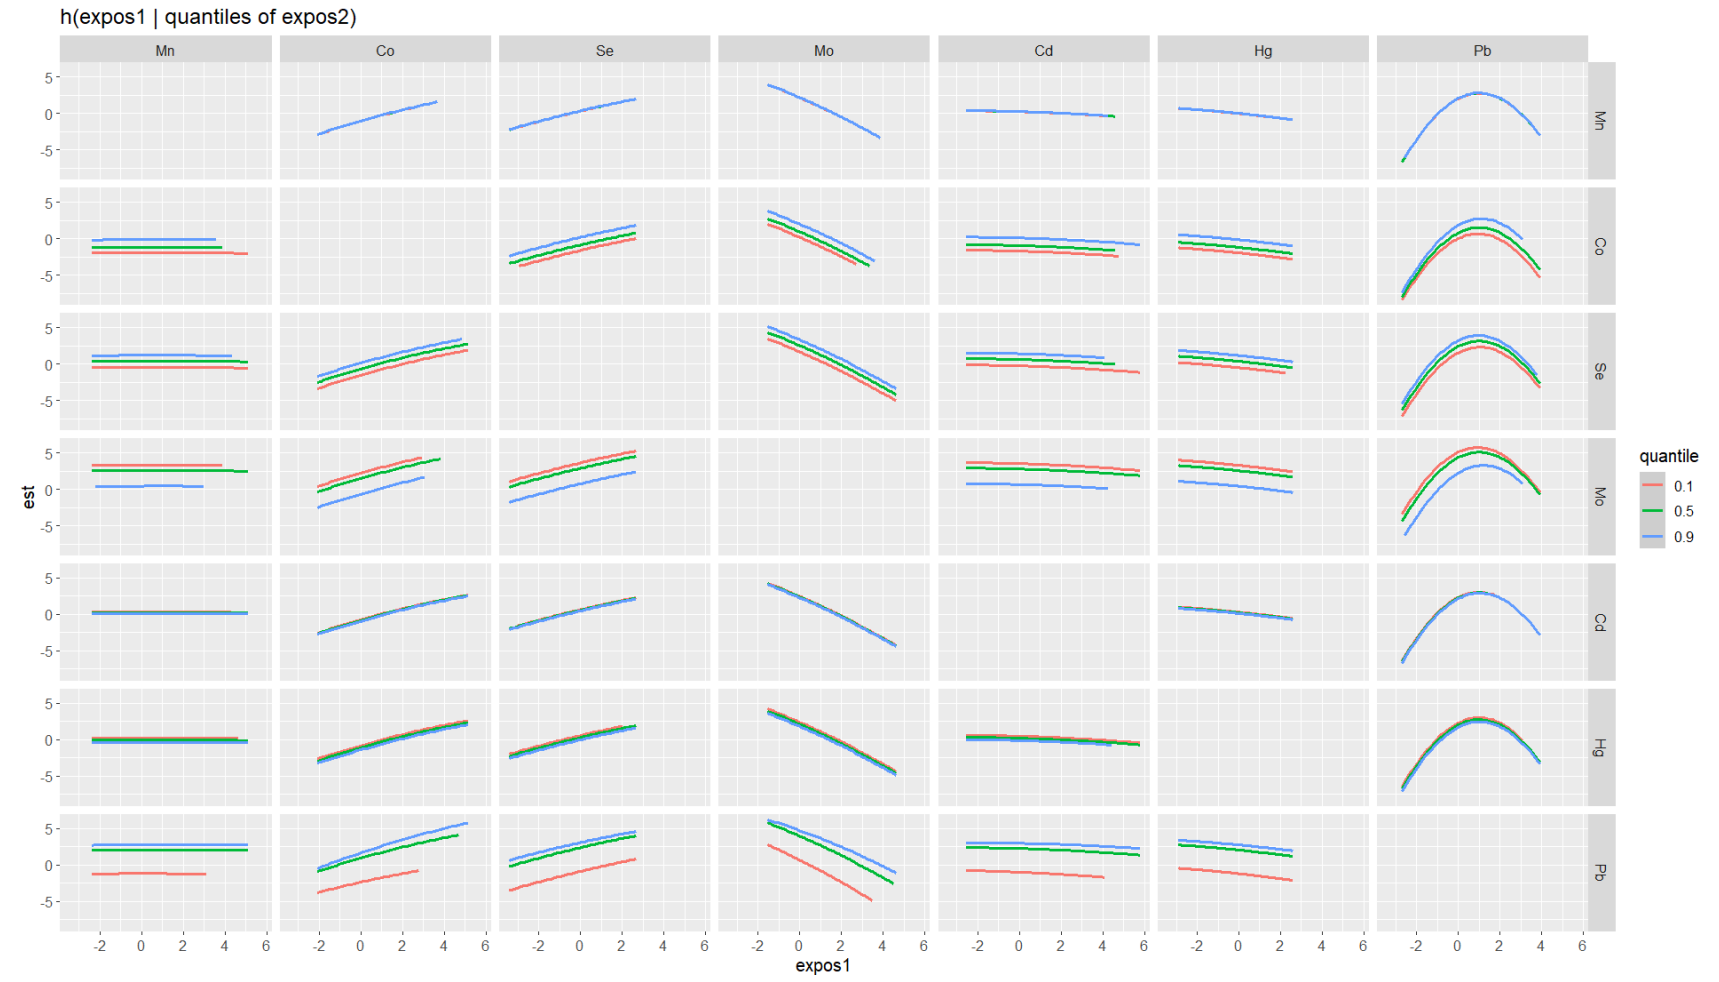

Abbreviations: Mn, manganese; Co, cobalt; Se, selenium; Mo, molybdenum; Cd, cadmium; Hg, mercury; Pb, lead. All models were adjusted for maternal education, child sex, child secondhand smoke exposure at 4 years of age, child fish/seafood intake, and supplement use at 4 years of age.

Figure S23. Joint associations of the metals with triglycerides at 4 years of age estimated by BKMR additionally adjusting for supplement use (n=291)

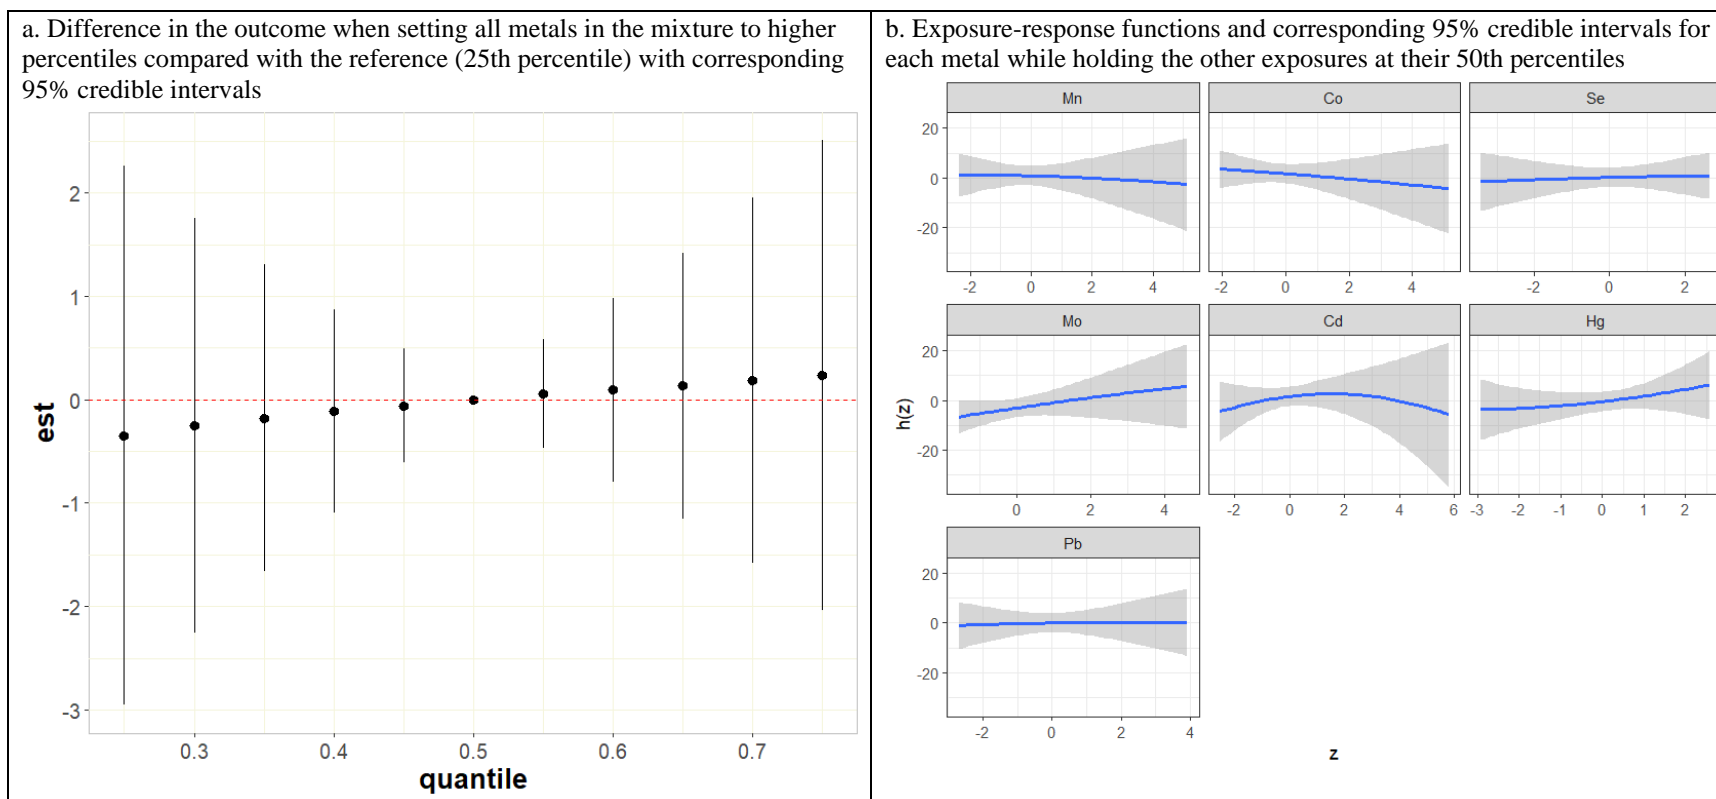

c. Exposure-response function for each metal exposure (column) with the second exposure (row) fixed at its 10<sup>th</sup>, 50<sup>th</sup>, and 90<sup>th</sup> percentiles, while holding the other exposures at their 50<sup>th</sup> percentiles

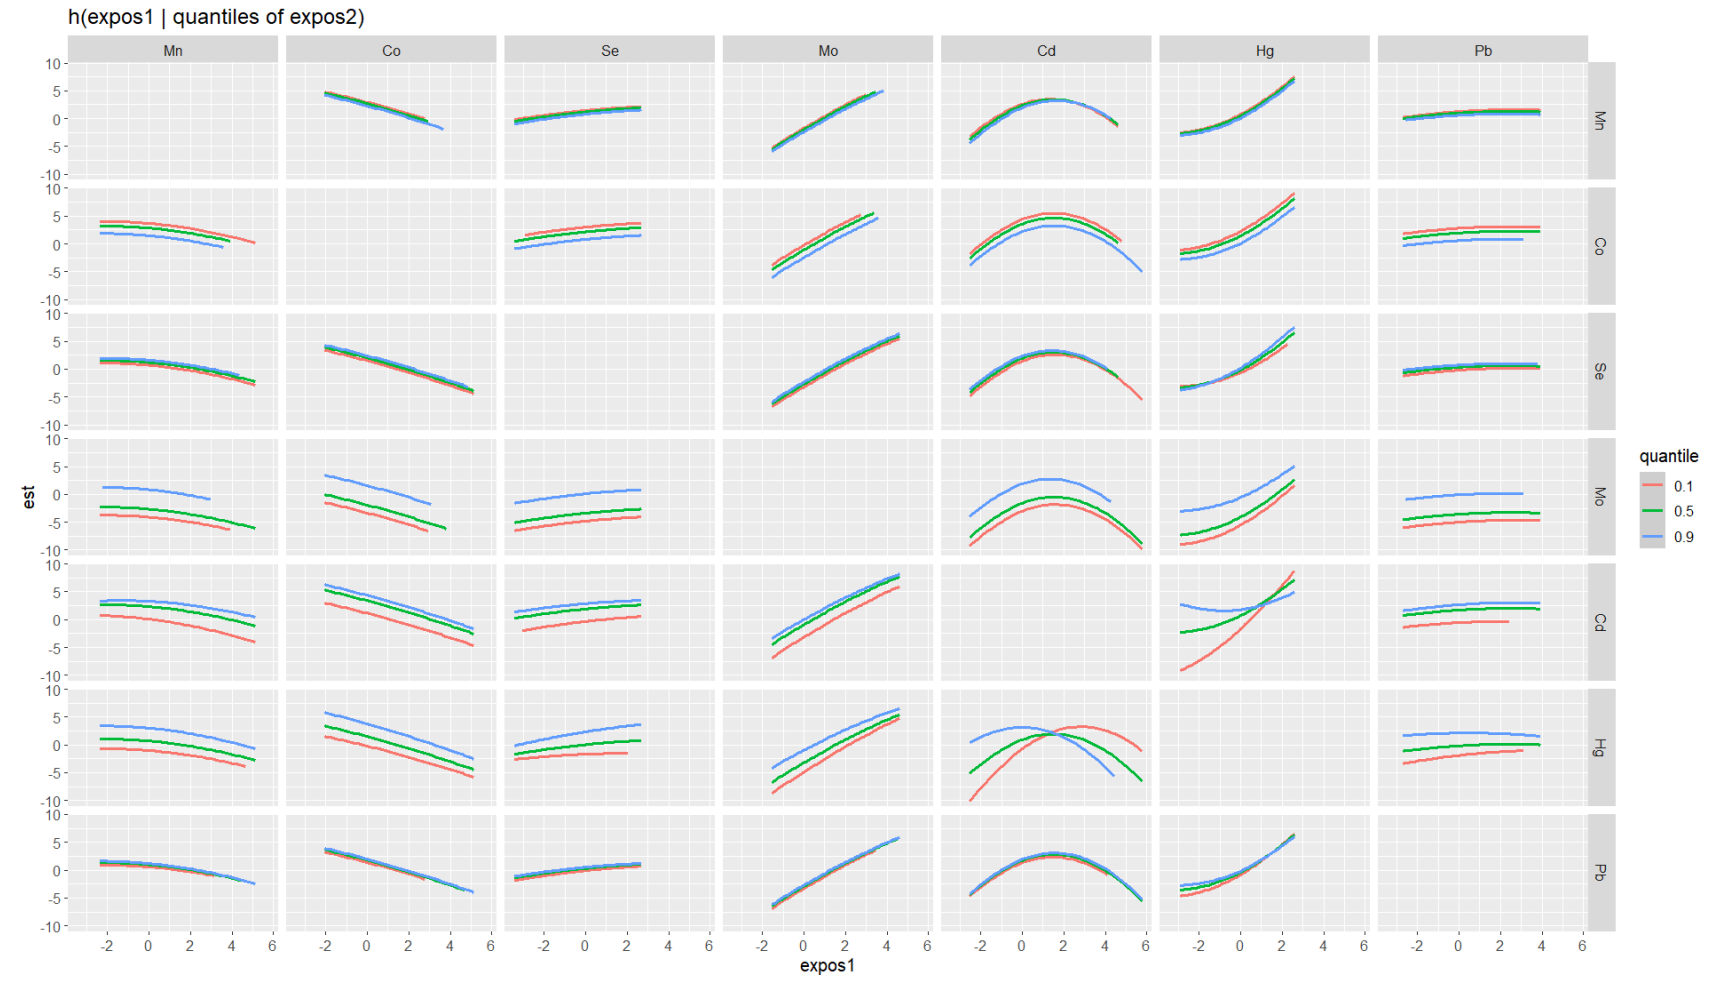

Abbreviations: Mn, manganese; Co, cobalt; Se, selenium; Mo, molybdenum; Cd, cadmium; Hg, mercury; Pb, lead. All models were adjusted for maternal education, child sex, child secondhand smoke exposure at 4 years of age, child fish/seafood intake, and supplement use at 4 years of age.

Table S13. Difference in lipid measure levels setting all metals (Co, Mn, Mo, Se, Cd, Hg, and Pb) to their 75<sup>th</sup> compared with 25<sup>th</sup> percentile concentrations stratified by sex, estimated by BKMR

| Lipid measure                                | 75 <sup>th</sup> vs. 25 <sup>th</sup> percentiles |                       |
|----------------------------------------------|---------------------------------------------------|-----------------------|
|                                              | Boys (n=160)                                      | Girls (n=131)         |
| Total cholesterol (mg/dL)                    | 11.31 (-2.38, 25.00)                              | 4.54 (-5.90, 14.97)   |
| Low-density lipoprotein cholesterol (mg/dL)  | 8.15 (-2.44, 18.75)                               | 4.04 (-5.52, 13.61)   |
| High-density lipoprotein cholesterol (mg/dL) | 0.51 (-4.35, 5.37)                                | 1.73 (-2.44, 5.91)    |
| Triglycerides (mg/dL)                        | 2.32 (-6.39, 11.03)                               | -4.03 (-21.70, 13.64) |

All models were adjusted for maternal education, child sex, child secondhand smoke exposure at 4 years of age, and child fish/seafood intake at 4 years of age.

Table S14. Posterior inclusion probabilities and effect estimates for each metal within the mixture in association with lipid measures stratified by sex, estimated by BKMR

| Exposure                   | Total cholesterol |                                                               | Low-density lipoprotein cholesterol |                                                               | High-density lipoprotein cholesterol |                                                               | Triglycerides |                                                               |
|----------------------------|-------------------|---------------------------------------------------------------|-------------------------------------|---------------------------------------------------------------|--------------------------------------|---------------------------------------------------------------|---------------|---------------------------------------------------------------|
|                            | PIP               | 75 <sup>th</sup> vs. 25 <sup>th</sup> percentile <sup>a</sup> | PIP                                 | 75 <sup>th</sup> vs. 25 <sup>th</sup> percentile <sup>a</sup> | PIP                                  | 75 <sup>th</sup> vs. 25 <sup>th</sup> percentile <sup>a</sup> | PIP           | 75 <sup>th</sup> vs. 25 <sup>th</sup> percentile <sup>a</sup> |
| <i>Among boys (n=160)</i>  |                   |                                                               |                                     |                                                               |                                      |                                                               |               |                                                               |
| Mn                         | 0.49              | 1.10 (-3.76, 5.96)                                            | 0.34                                | 0.28 (-3.44, 4.01)                                            | 0.32                                 | 0.29 (-1.49, 2.08)                                            | 0.25          | 0.35 (-4.12, 4.82)                                            |
| Co                         | 0.40              | -0.32 (-4.53, 3.90)                                           | 0.26                                | -0.54 (-4.50, 3.42)                                           | 0.37                                 | 0.25 (-1.91, 2.41)                                            | 0.22          | -0.13 (-3.25, 2.99)                                           |
| Se                         | 0.91              | 9.03 (-1.04, 19.10)                                           | 0.90                                | 7.88 (-0.65, 16.41)                                           | 0.49                                 | 0.92 (-1.92, 3.76)                                            | 0.26          | -0.19 (-3.42, 3.04)                                           |
| Mo                         | 0.48              | 0.76 (-3.12, 4.64)                                            | 0.59                                | 1.97 (-2.71, 6.65)                                            | 0.48                                 | -1.00 (-3.74, 1.75)                                           | 0.37          | 0.38 (-3.14, 3.91)                                            |
| Cd                         | 0.49              | -0.94 (-6.29, 4.41)                                           | 0.55                                | -0.53 (-5.55, 4.49)                                           | 0.42                                 | -0.76 (-3.90, 2.38)                                           | 0.24          | 0.60 (-2.92, 4.13)                                            |
| Hg                         | 0.31              | 0.21 (-2.98, 3.40)                                            | 0.21                                | 0.17 (-2.21, 2.54)                                            | 0.41                                 | -0.32 (-2.17, 1.52)                                           | 0.42          | 1.51 (-3.78, 6.80)                                            |
| Pb                         | 0.59              | 3.43 (-5.00, 11.86)                                           | 0.32                                | 1.30 (-4.07, 6.67)                                            | 0.39                                 | 0.41 (-2.04, 2.86)                                            | 0.14          | 0.26 (-2.63, 3.14)                                            |
| <i>Among girls (n=131)</i> |                   |                                                               |                                     |                                                               |                                      |                                                               |               |                                                               |
| Mn                         | 0.20              | 0.14 (-2.84, 3.12)                                            | 0.12                                | 0.23 (-1.96, 2.43)                                            | 0.24                                 | -0.18 (-1.62, 1.27)                                           | 0.33          | -2.26 (-10.96, 6.44)                                          |
| Co                         | 0.19              | 0.07 (-1.84, 1.97)                                            | 0.06                                | 0.01 (-1.16, 1.17)                                            | 0.21                                 | 0.09 (-0.78, 0.96)                                            | 0.15          | 0.18 (-3.21, 3.57)                                            |
| Se                         | 0.52              | 3.08 (-5.35, 11.51)                                           | 0.47                                | 3.23 (-5.14, 11.60)                                           | 0.19                                 | -0.02 (-1.05, 1.01)                                           | 0.26          | 1.82 (-7.29, 10.93)                                           |
| Mo                         | 0.24              | 0.17 (-2.73, 3.07)                                            | 0.11                                | 0.22 (-2.06, 2.49)                                            | 0.20                                 | -0.21 (-1.64, 1.22)                                           | 0.15          | 0.65 (-4.10, 5.39)                                            |
| Cd                         | 0.28              | 0.42 (-2.89, 3.74)                                            | 0.15                                | 0.24 (-1.97, 2.46)                                            | 0.22                                 | 0.10 (-0.99, 1.20)                                            | 0.93          | 1.99 (-8.97, 12.95)                                           |
| Hg                         | 0.30              | 0.50 (-2.60, 3.60)                                            | 0.15                                | 0.25 (-2.06, 2.56)                                            | 0.22                                 | 0.02 (-0.98, 1.02)                                            | 0.95          | 5.77 (-6.97, 18.51)                                           |
| Pb                         | 0.25              | 0.37 (-2.71, 3.45)                                            | 0.08                                | 0.04 (-1.69, 1.78)                                            | 0.71                                 | 1.66 (-1.77, 5.09)                                            | 0.54          | -0.24 (-8.50, 8.01)                                           |

<sup>a</sup> The difference in the lipid measure, comparing each metal component within the mixture at 75<sup>th</sup> percentile versus 25<sup>th</sup> percentile, while holding all other metals constant at their median values.

All models were adjusted for maternal education, child sex, child secondhand smoke exposure at 4 years of age, and child fish/seafood intake at 4 years of age. Abbreviations: Mn, manganese; Co, cobalt; Se, selenium; Mo, molybdenum; Cd, cadmium; Hg, mercury; Pb, lead.

Figure S24. Joint associations of the metals with total cholesterol at 4 years of age among boys, estimated by BKMR (n=160)

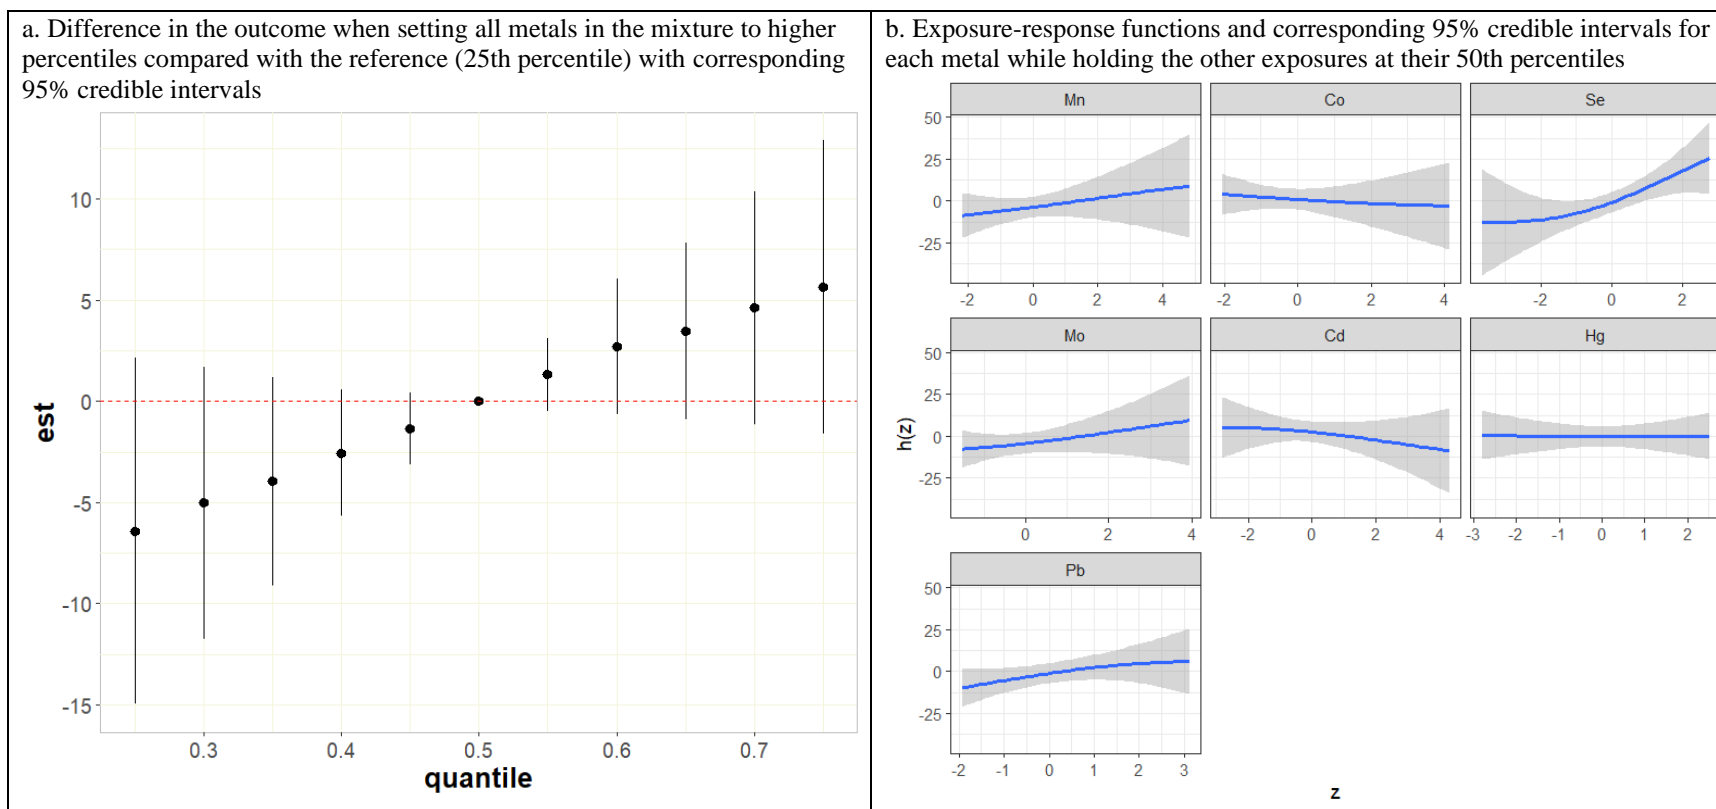

c. Exposure-response function for each metal setting a second metal at its 10th, 50th, and 90th percentiles, while holding the other exposures at their 50th percentiles

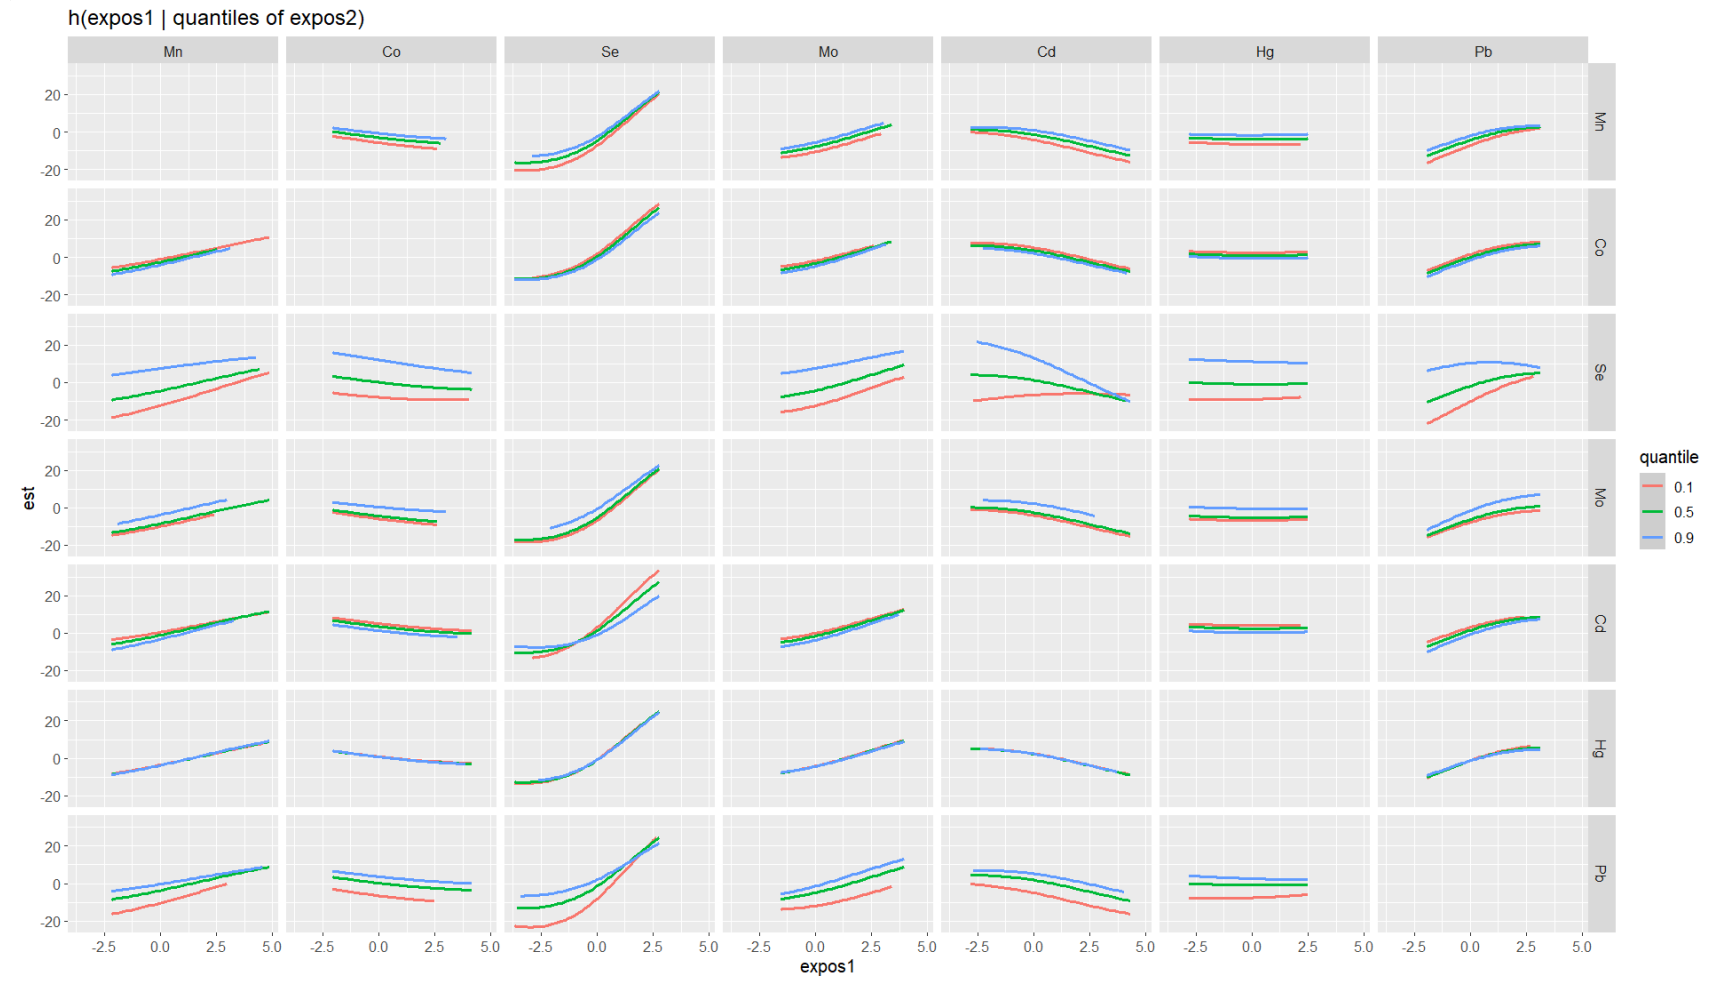

Abbreviations: Mn, manganese; Co, cobalt; Se, selenium; Mo, molybdenum; Cd, cadmium; Hg, mercury; Pb, lead. All models were adjusted for maternal education, child sex, child secondhand smoke exposure at 4 years of age, and child fish/seafood intake at 4 years of age.

Figure S25. Joint associations of the metals with low-density lipoprotein cholesterol at 4 years of age among boys, estimated by BKMR (n=160)

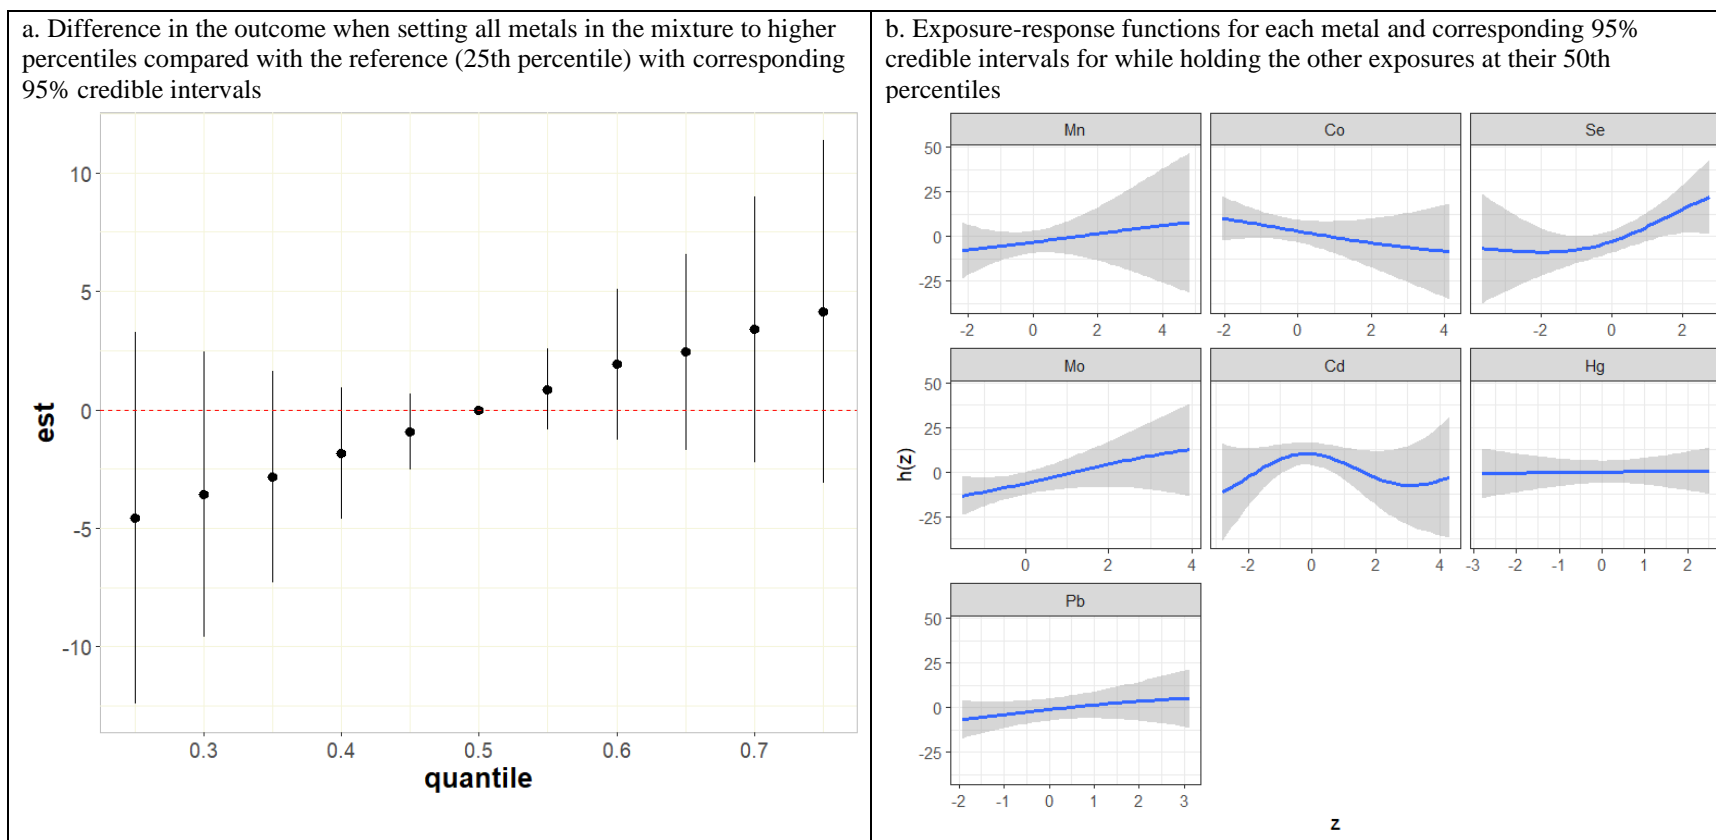



c. Exposure-response functions for each metal exposure (column) setting a second exposure (row) to its 10th, 50th, and 90th percentiles, while holding other exposures at their 50th percentiles

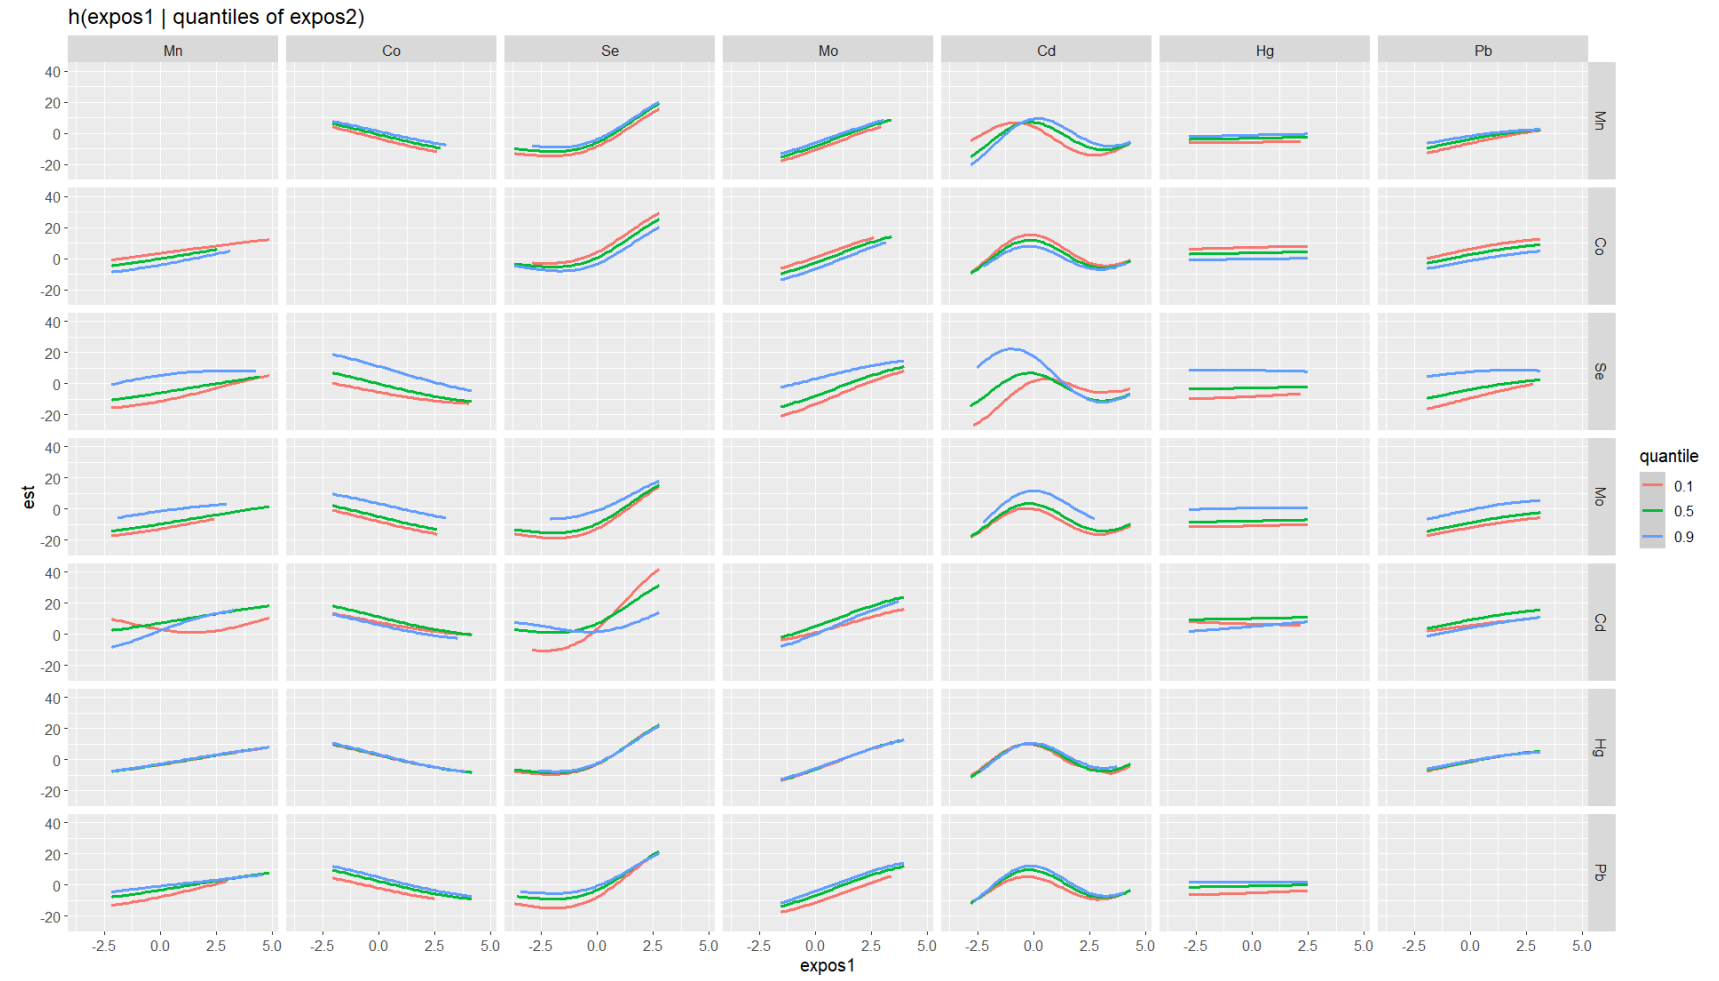

Abbreviations: Mn, manganese; Co, cobalt; Se, selenium; Mo, molybdenum; Cd, cadmium; Hg, mercury; Pb, lead. All models were adjusted for maternal education, child sex, child secondhand smoke exposure at 4 years of age, and child fish/seafood intake at 4 years of age.

Figure S26. Joint associations of the metals with high-density lipoprotein cholesterol at 4 years of age among boys, estimated by BKMR (n=160)

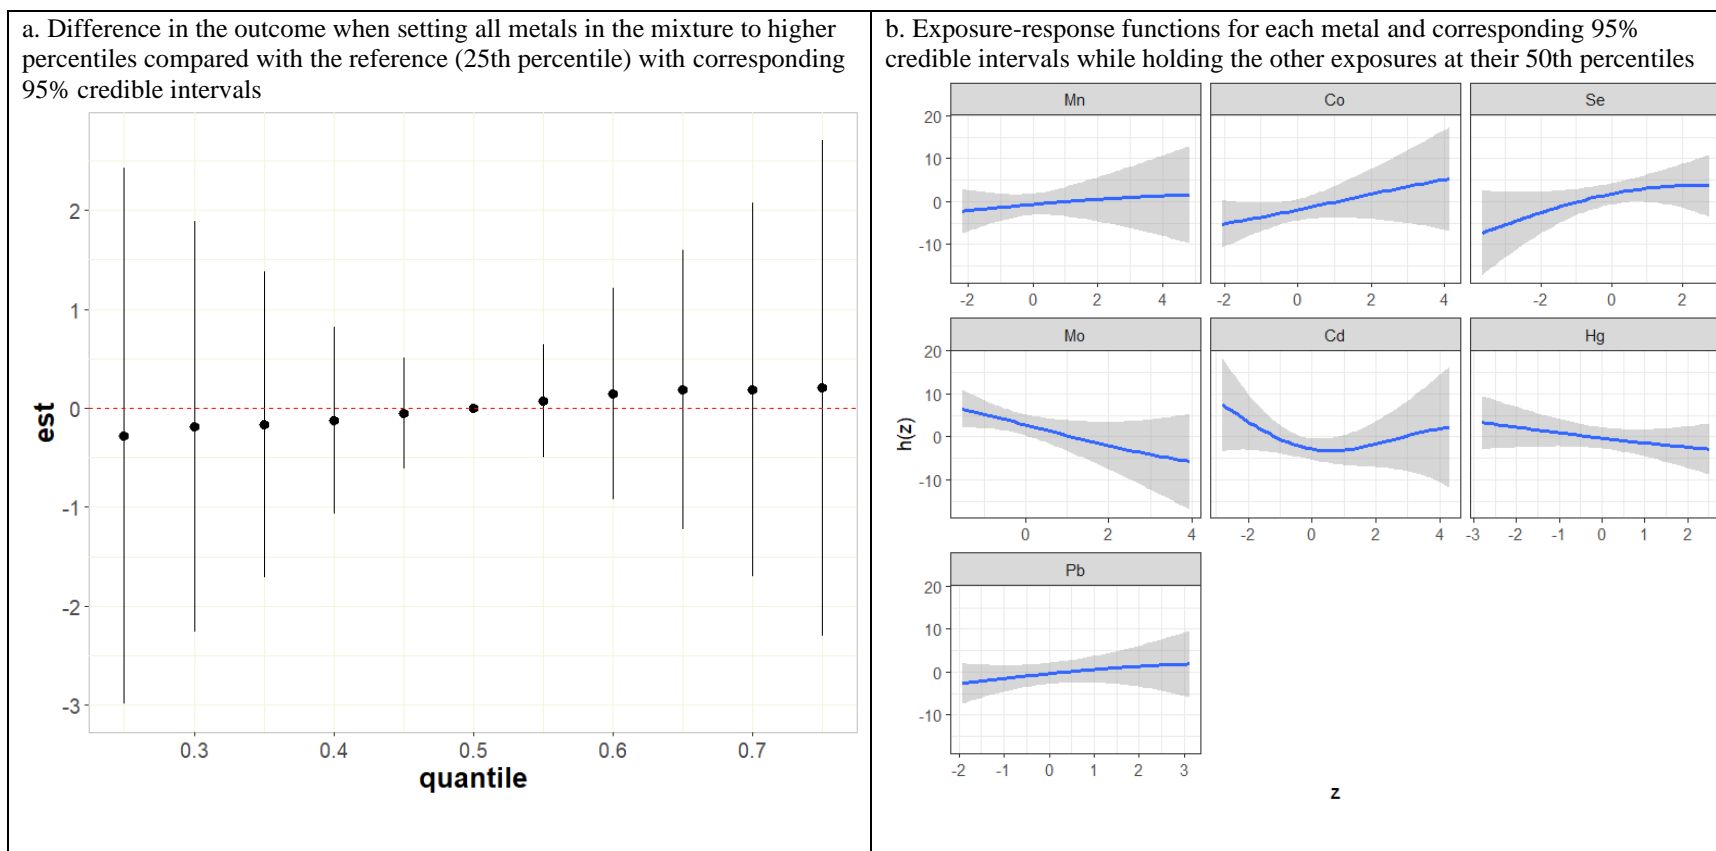

c. Exposure-response function for each metal exposure (column) setting a second exposure (row) to its 10th, 50th, and 90th percentiles, while holding the other exposures at their 50th percentiles

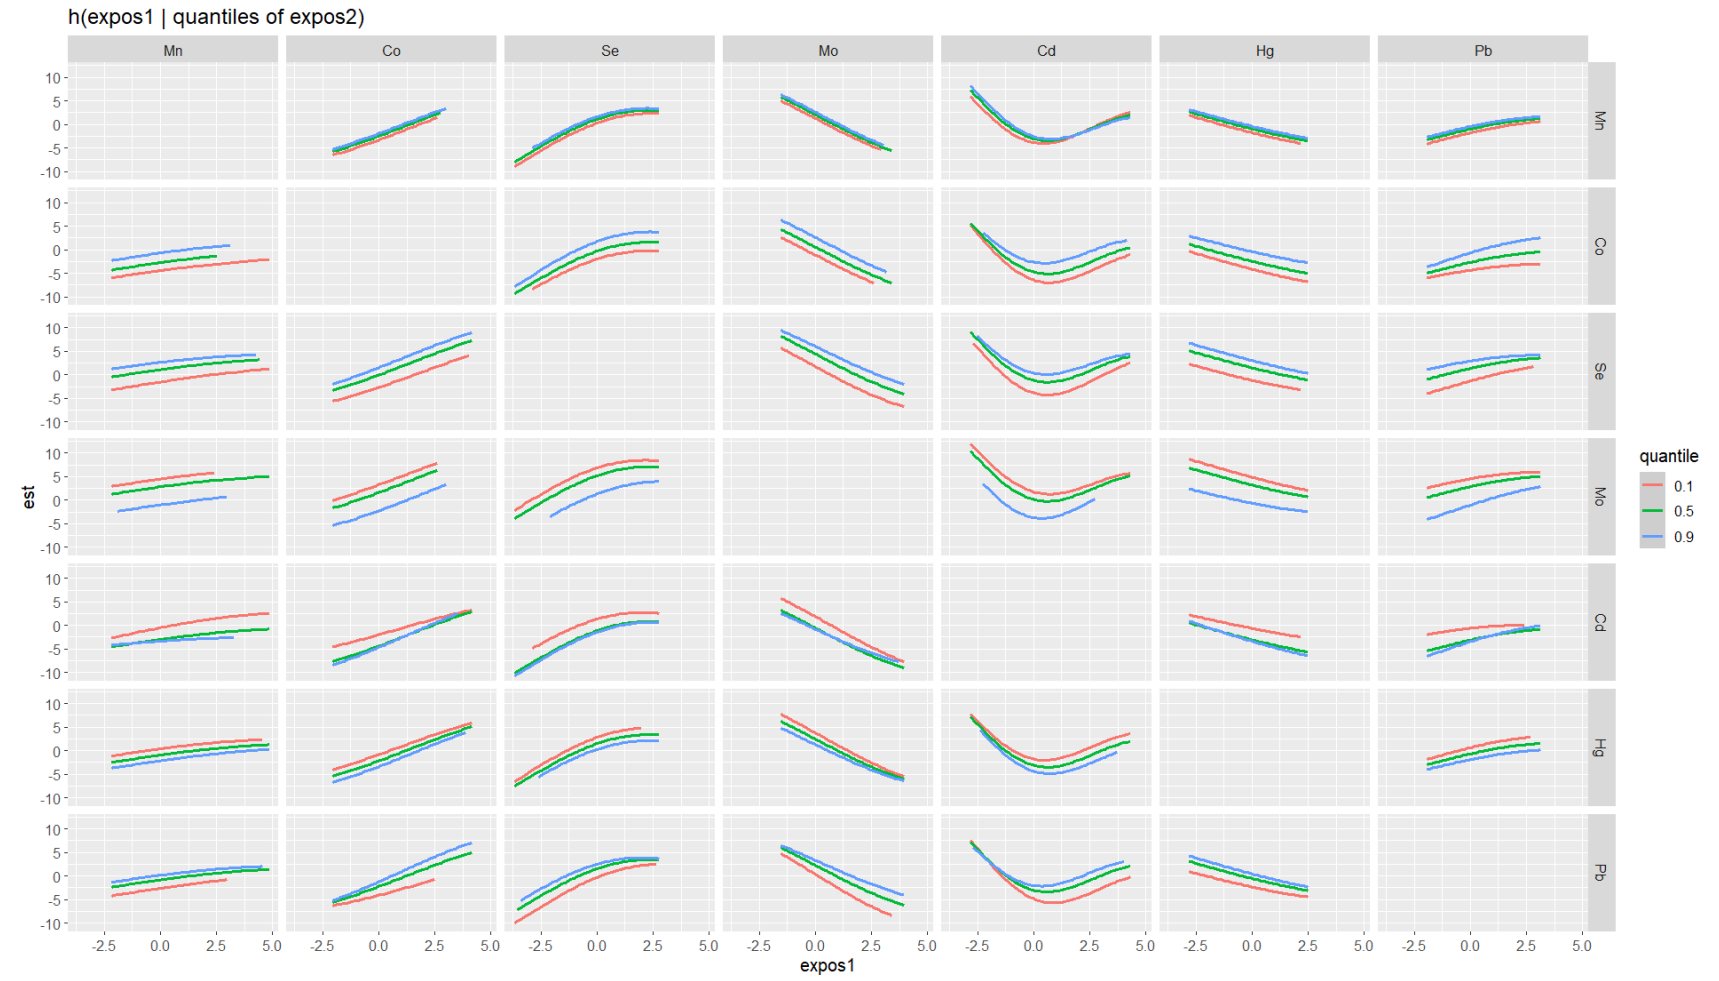

Abbreviations: Mn, manganese; Co, cobalt; Se, selenium; Mo, molybdenum; Cd, cadmium; Hg, mercury; Pb, lead. All models were adjusted for maternal education, child sex, child secondhand smoke exposure at 4 years of age, and child fish/seafood intake at 4 years of age.

Figure S27. Joint associations of the metals with triglycerides at 4 years of age among boys, estimated by BKMR (n=160)

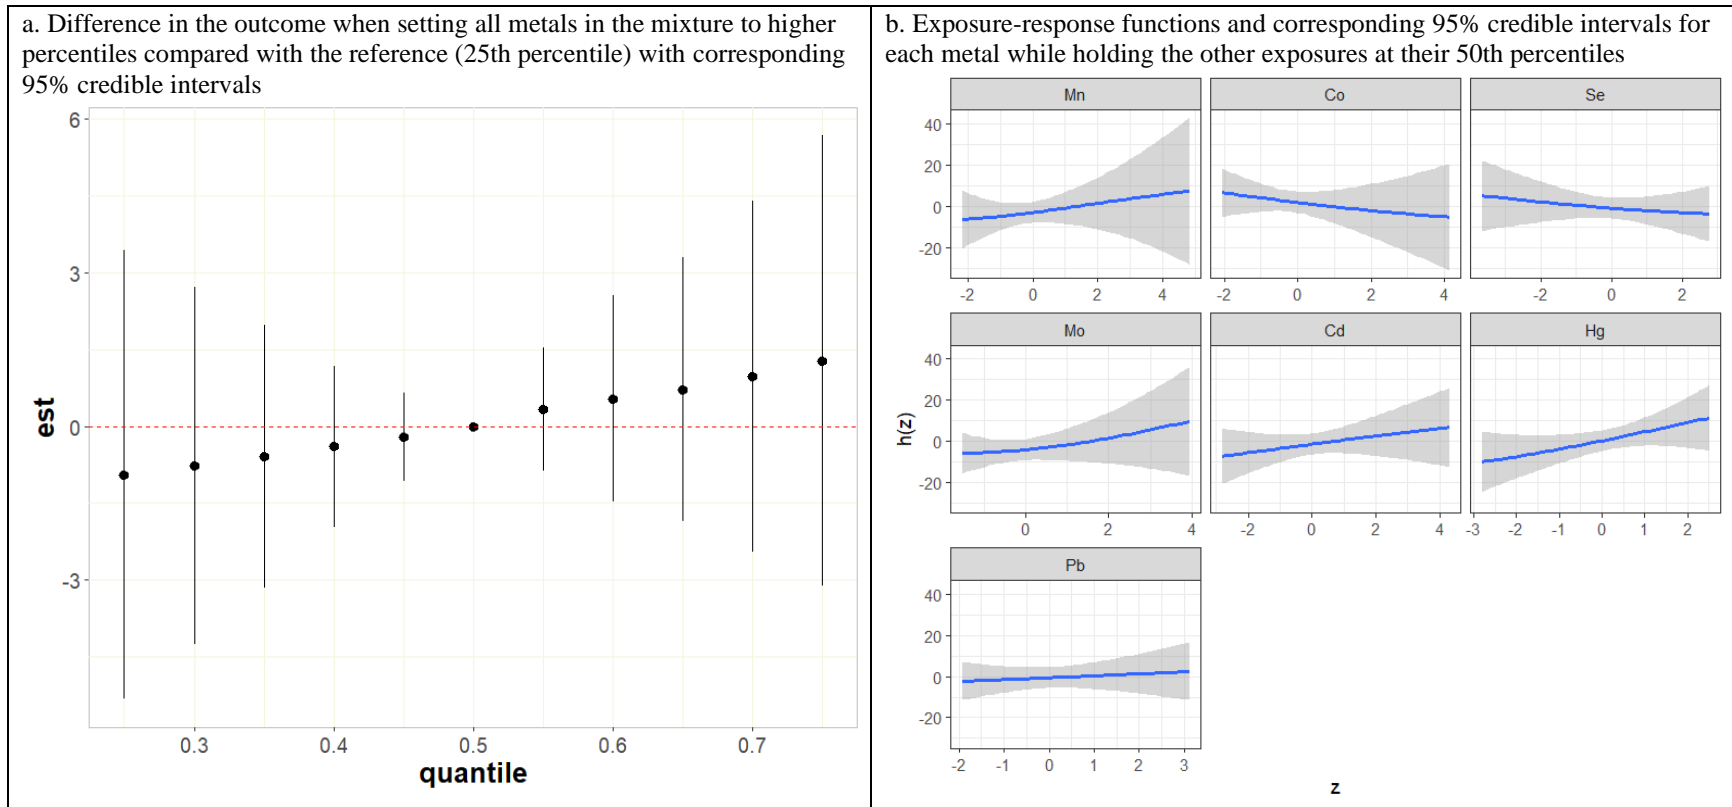

c. Exposure-response function for each metal exposure (column) setting the second metal exposure (row) to its 10th, 50th, and 90th percentiles, while holding the other exposures at their 50th percentiles  
 $h(\text{expos1} \mid \text{quantiles of expos2})$

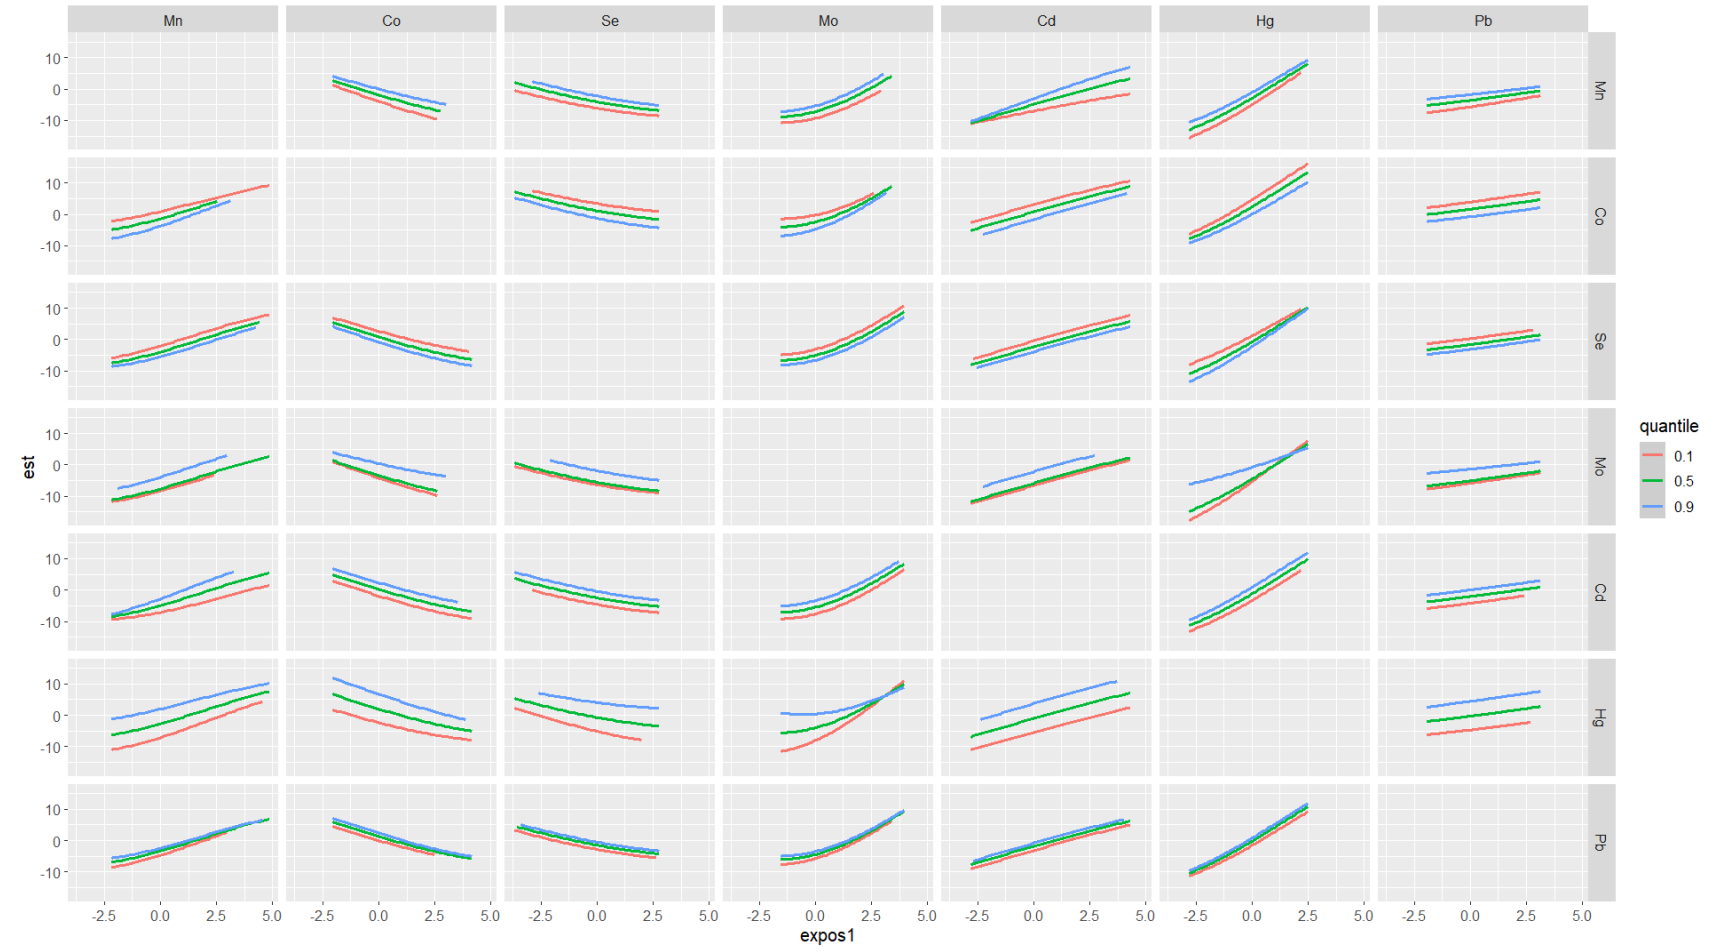

Abbreviations: Mn, manganese; Co, cobalt; Se, selenium; Mo, molybdenum; Cd, cadmium; Hg, mercury; Pb, lead. All models were adjusted for maternal education, child sex, child secondhand smoke exposure at 4 years of age, and child fish/seafood intake at 4 years of age.

Figure S28. Joint associations of the metals with total cholesterol at 4 years of age among girls, estimated by BKMR (n=131)

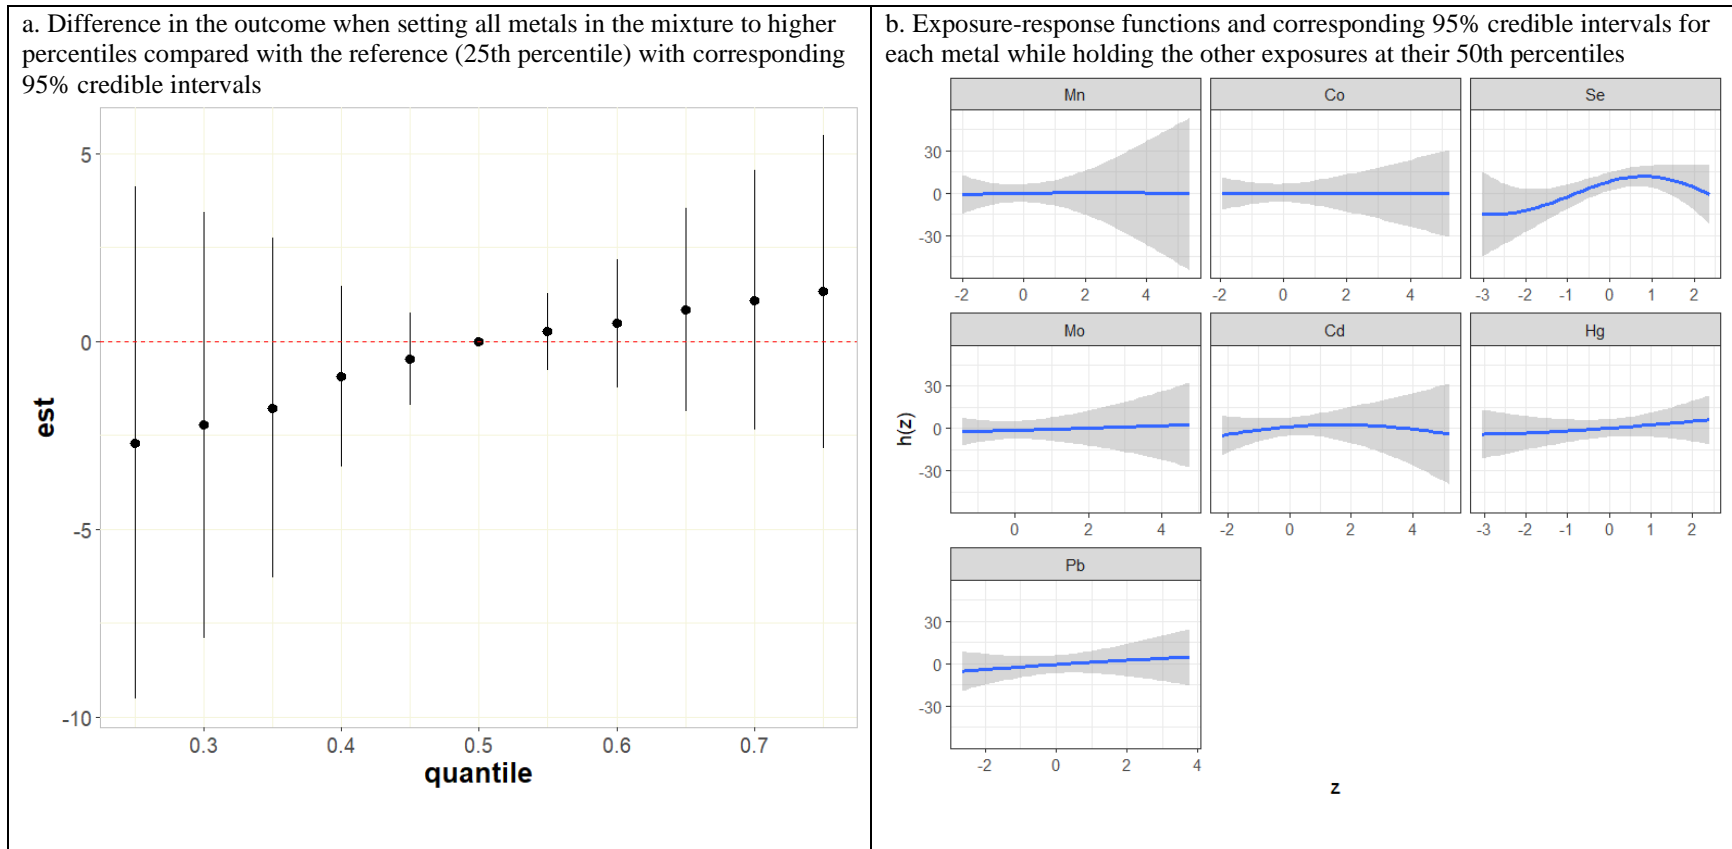

c. Exposure-response function for each metal exposure (column) setting the second exposure (row) to its 10th, 50th, and 90th percentiles, while holding the other exposures at their 50th percentiles

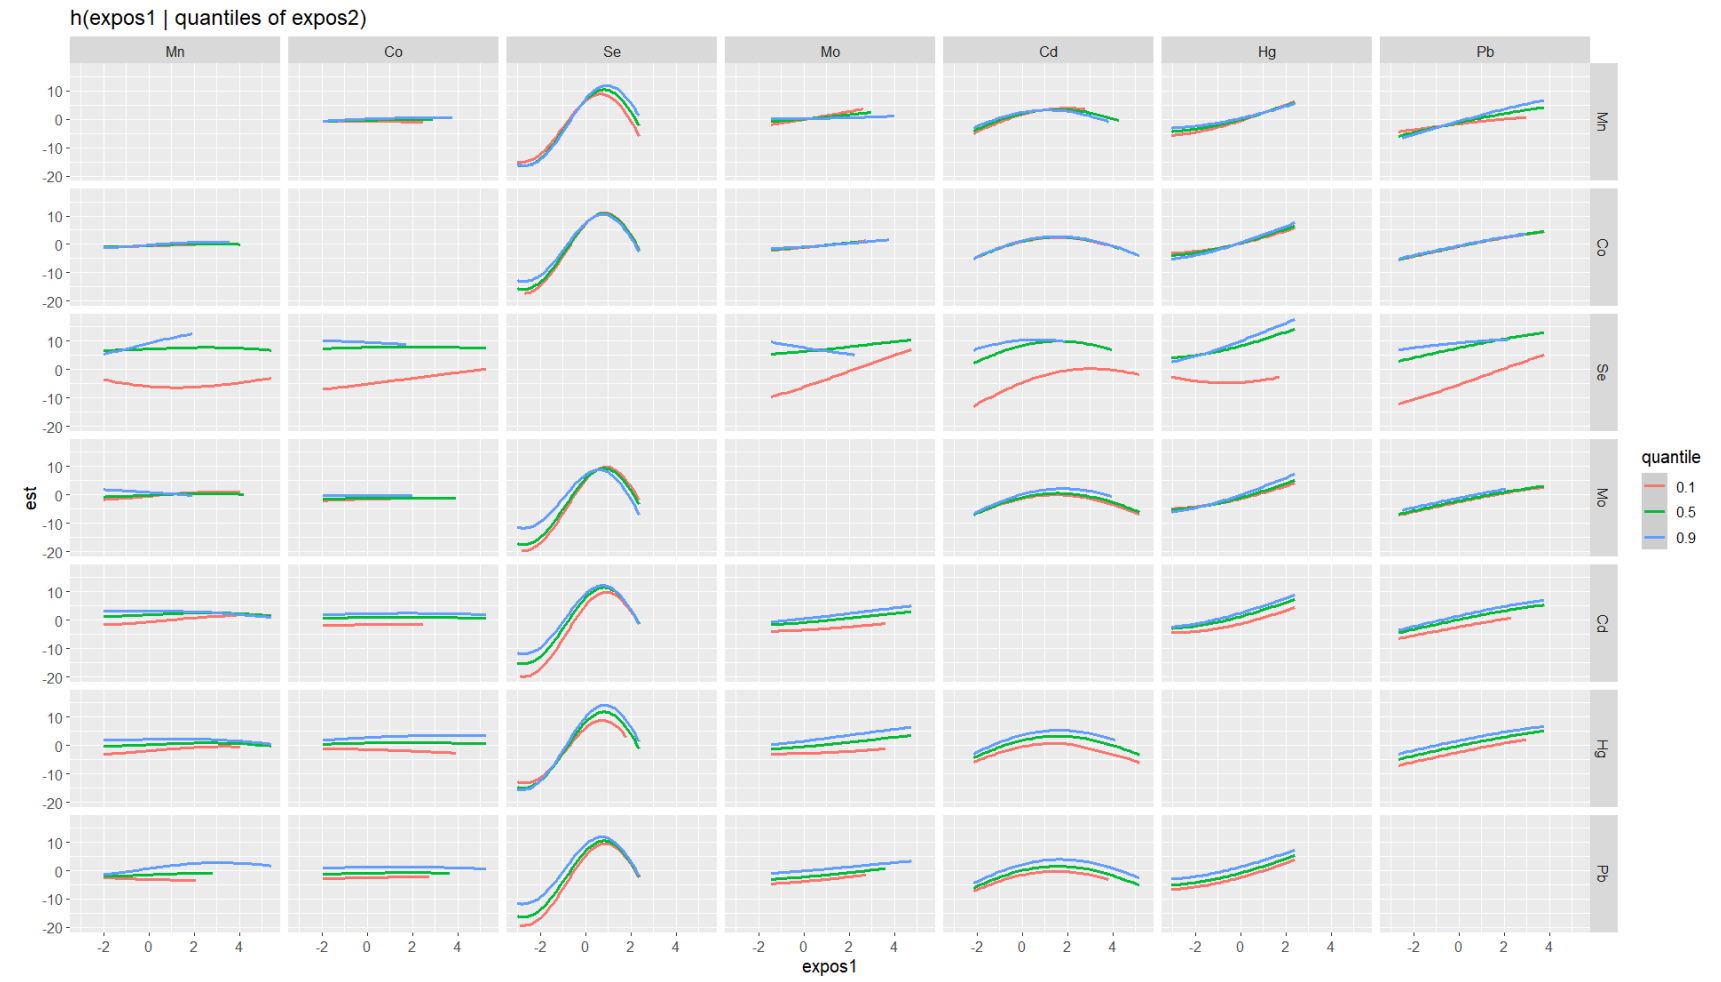

Abbreviations: Mn, manganese; Co, cobalt; Se, selenium; Mo, molybdenum; Cd, cadmium; Hg, mercury; Pb, lead. All models were adjusted for maternal education, child sex, child secondhand smoke exposure at 4 years of age, and child fish/seafood intake at 4 years of age.

Figure S29. Joint associations of the metals with low-density lipoprotein cholesterol at 4 years of age among girls, estimated by BKMR (n=131)

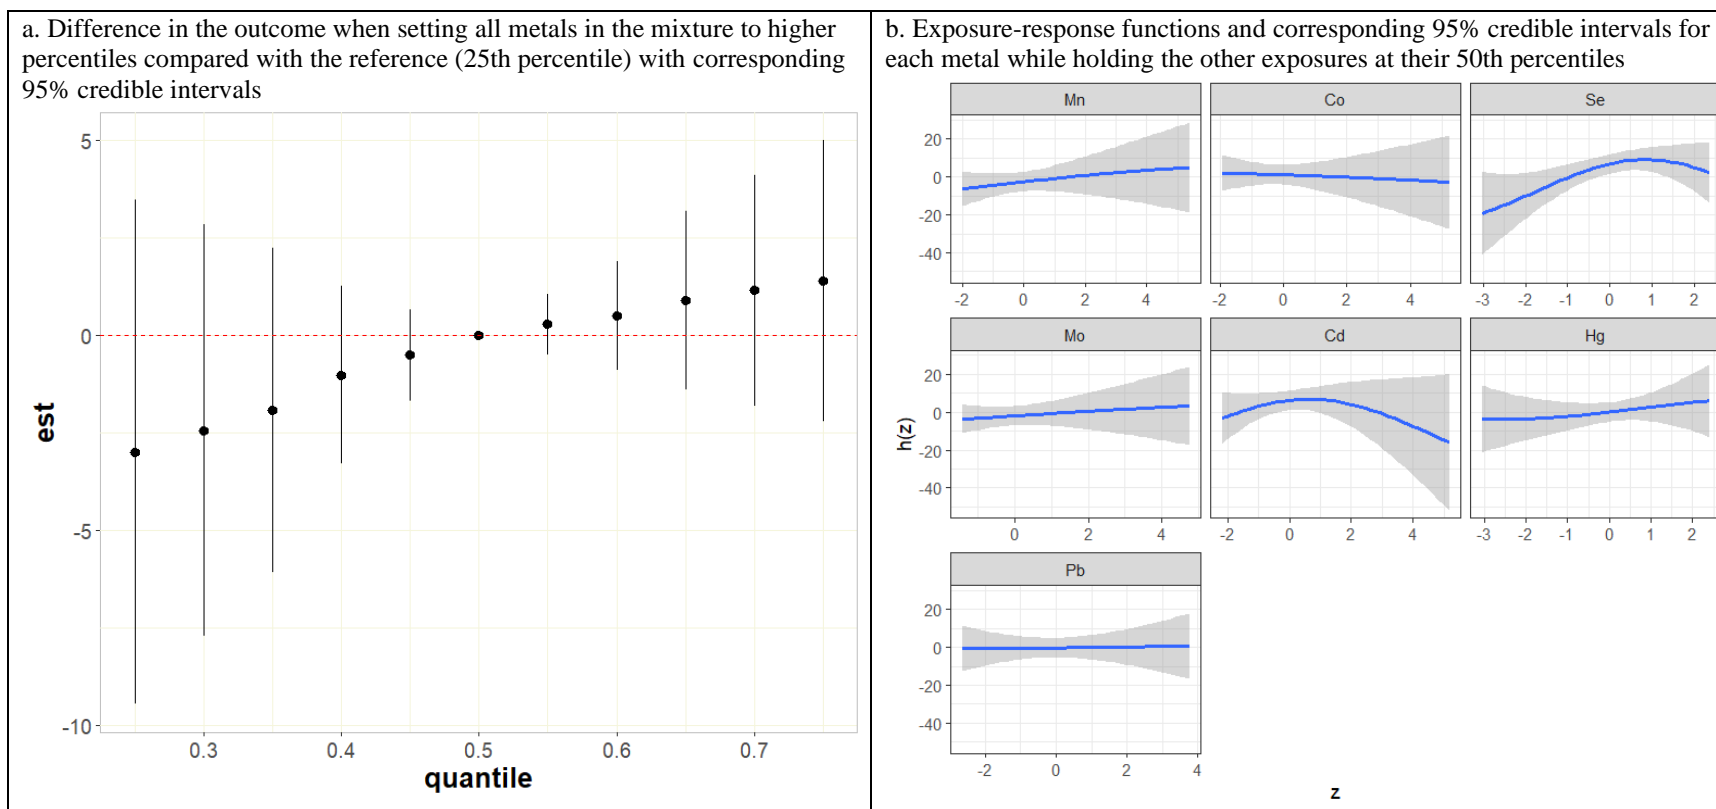



c. Exposure-response function of each metal exposure (column) setting the second exposure (row) to its 10th, 50th, and 90th percentiles, while holding the other exposures at their 50th percentiles

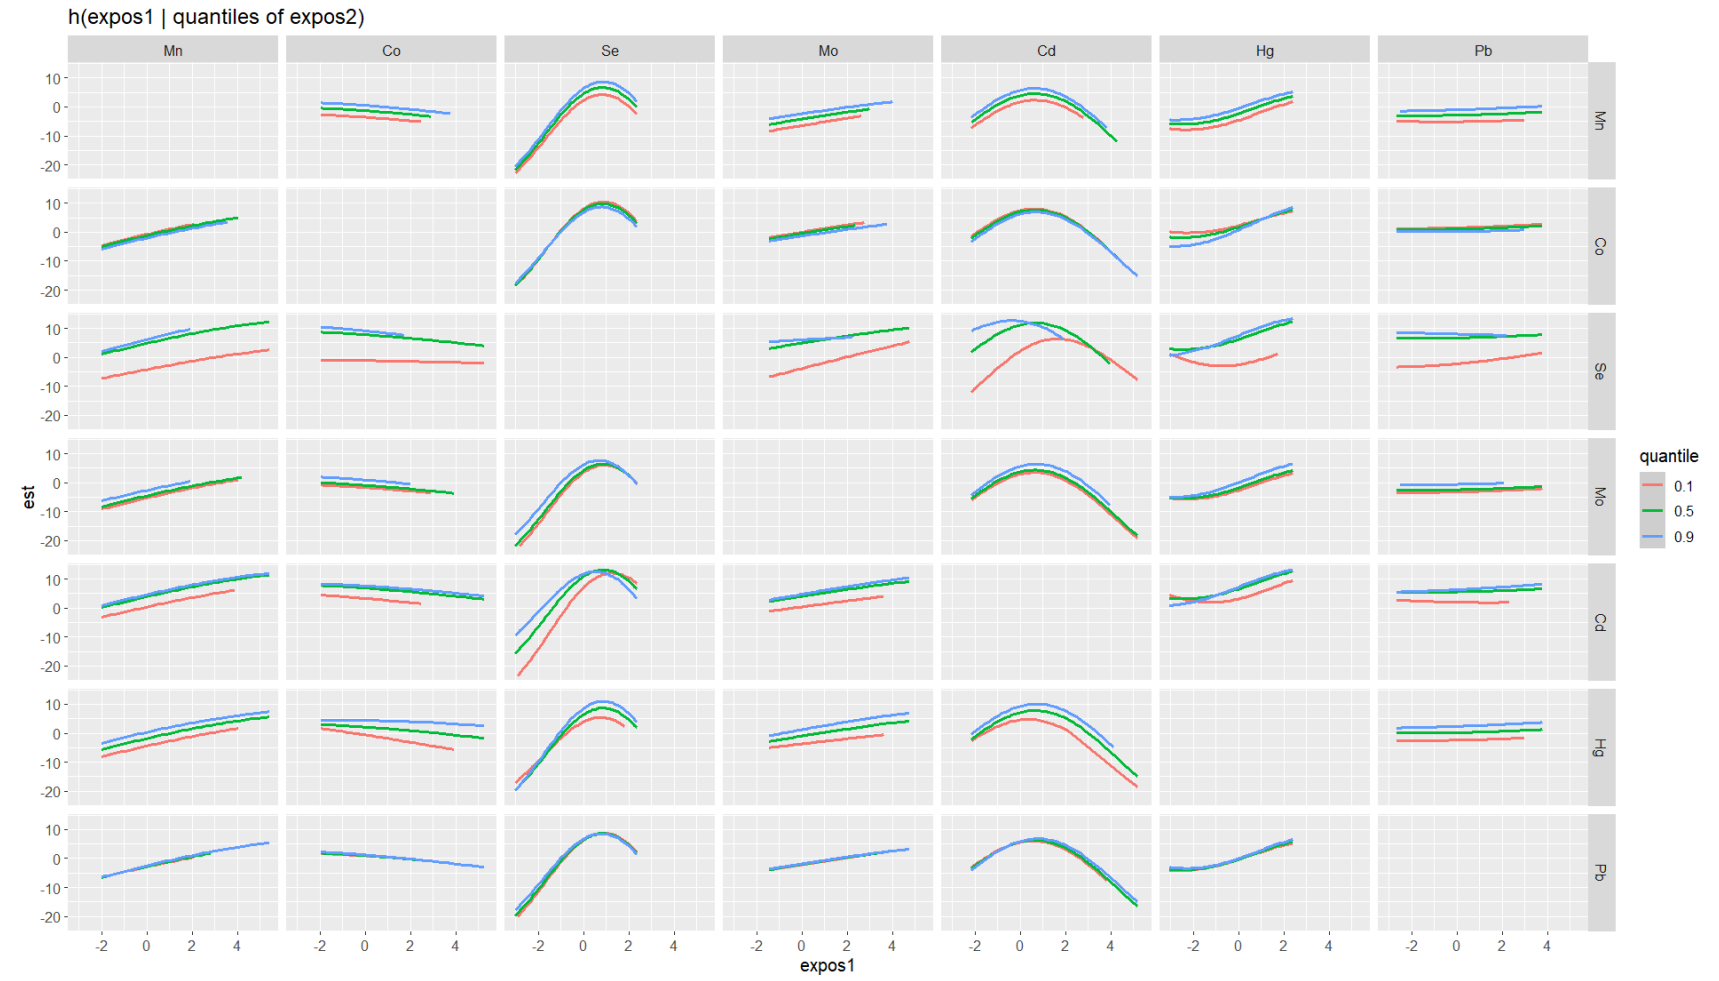

Abbreviations: Mn, manganese; Co, cobalt; Se, selenium; Mo, molybdenum; Cd, cadmium; Hg, mercury; Pb, lead. All models were adjusted for maternal education, child sex, child secondhand smoke exposure at 4 years of age, and child fish/seafood intake at 4 years of age.

Figure S30. Joint associations of the metals with high-density lipoprotein cholesterol at 4 years of age among girls, estimated by BKMR (n=131)

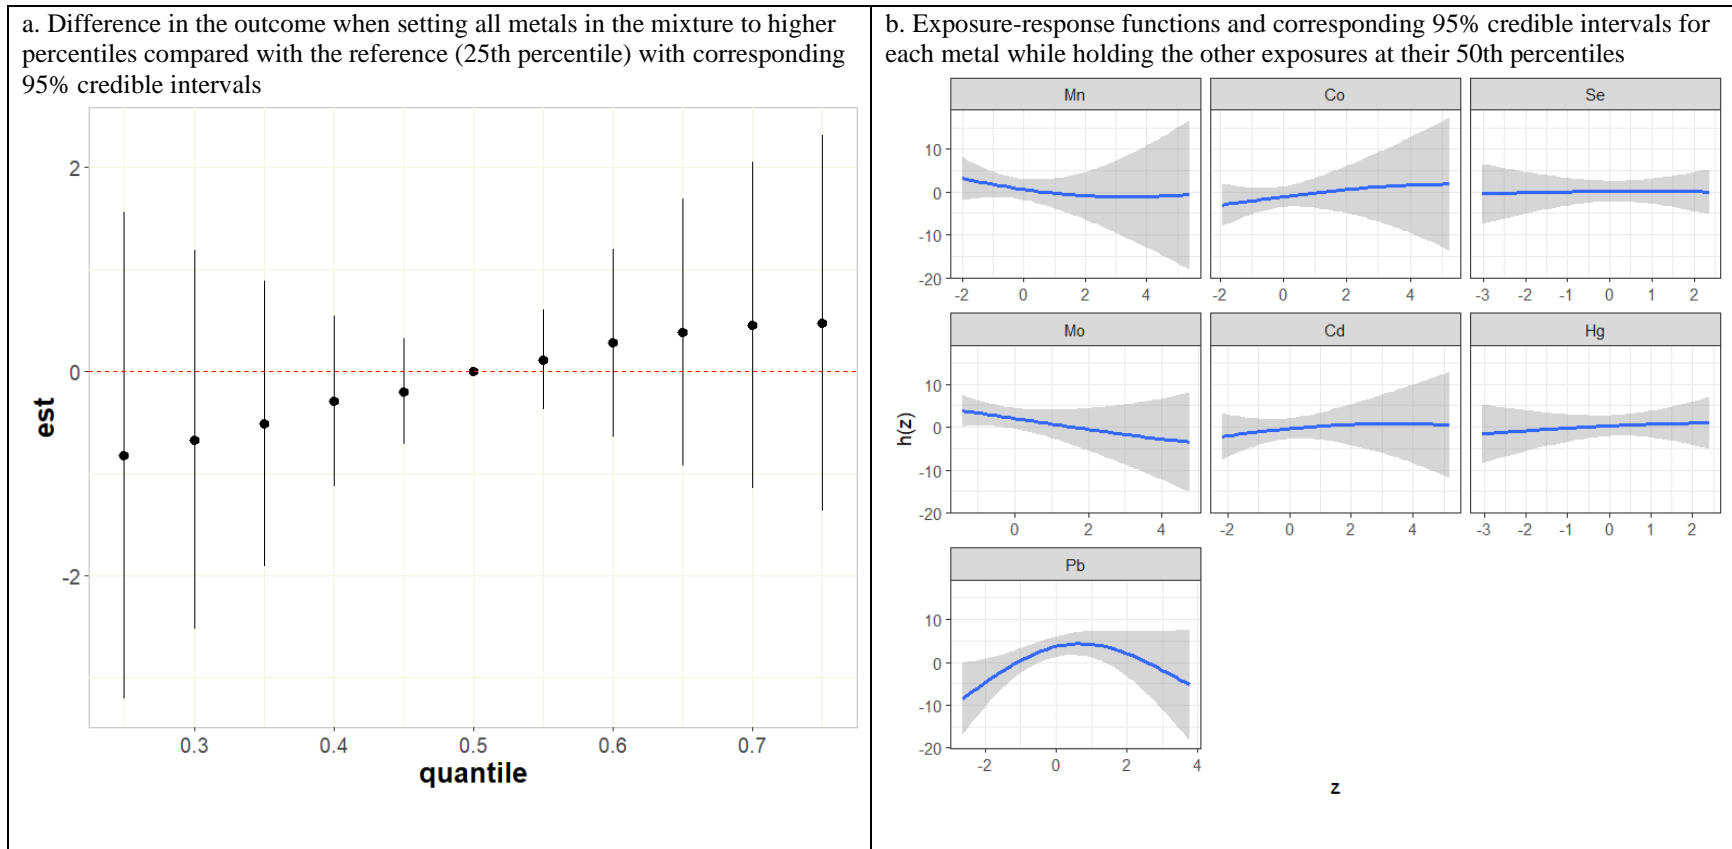

c. Exposure-response function for each metal exposure (column) setting a second exposure (row) to its 10th, 50th, and 90th percentiles, while holding the other exposures at their 50th percentiles

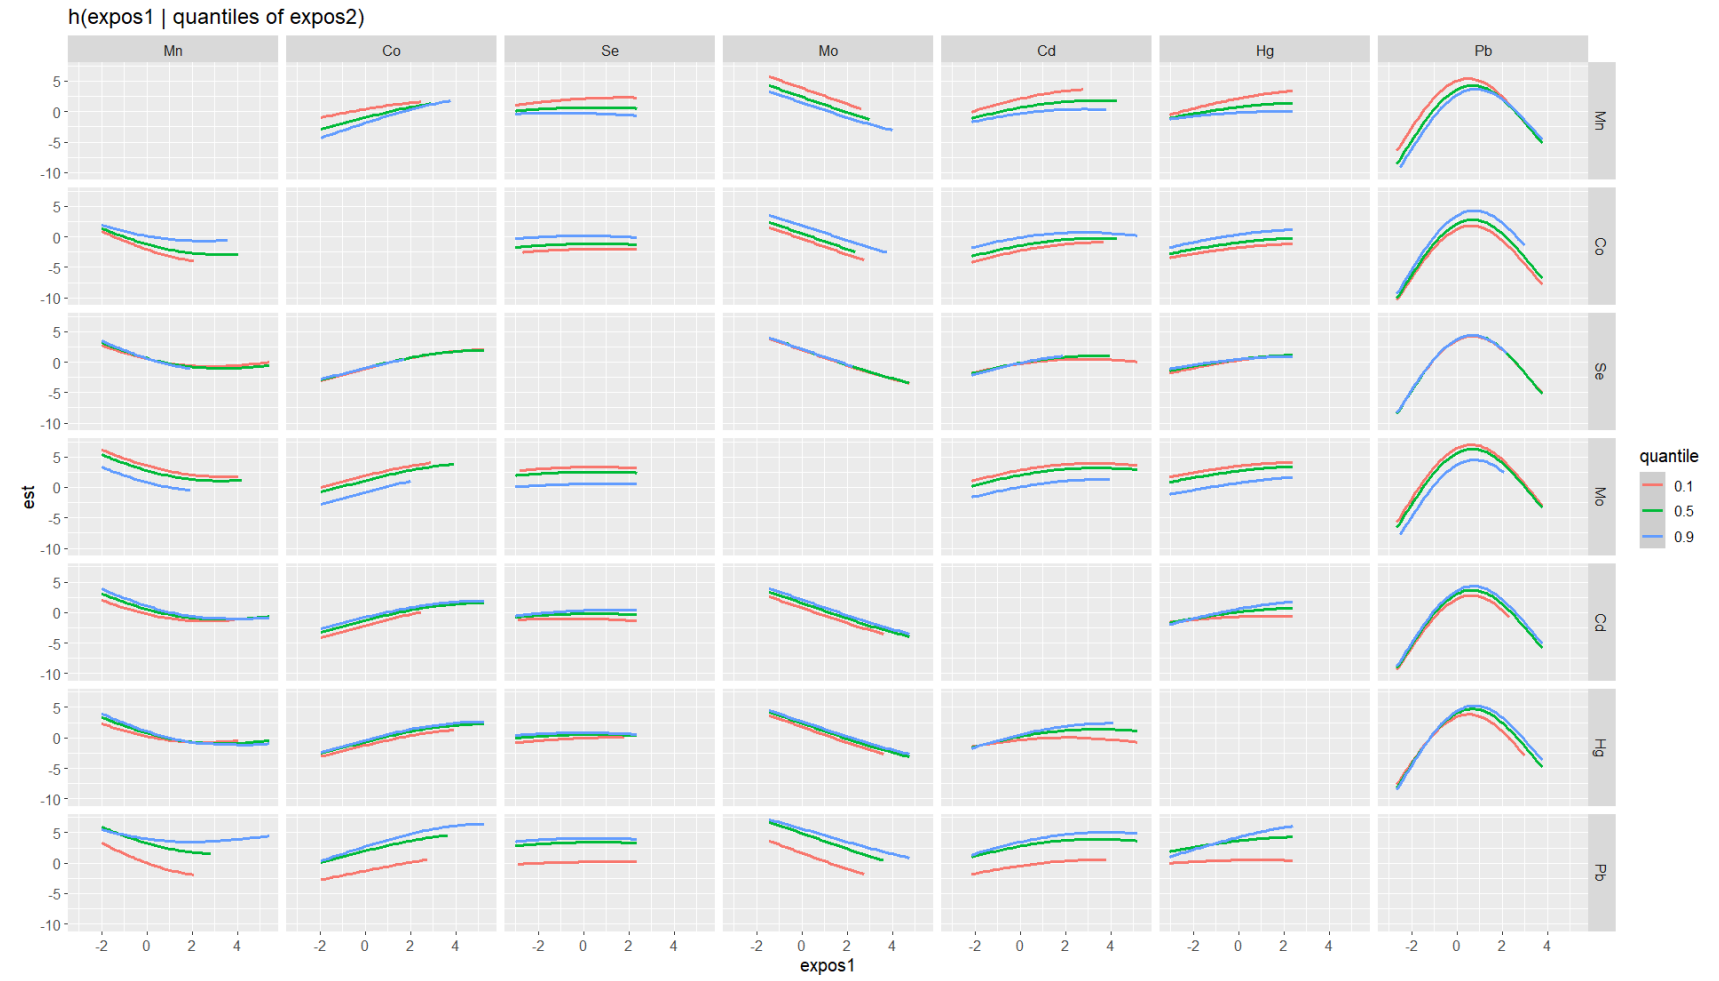

Abbreviations: Mn, manganese; Co, cobalt; Se, selenium; Mo, molybdenum; Cd, cadmium; Hg, mercury; Pb, lead. All models were adjusted for maternal education, child sex, child secondhand smoke exposure at 4 years of age, and child fish/seafood intake at 4 years of age.

Figure S31. Joint associations of the metals with triglycerides at 4 years of age among girls, estimated by BKMR (n=131)

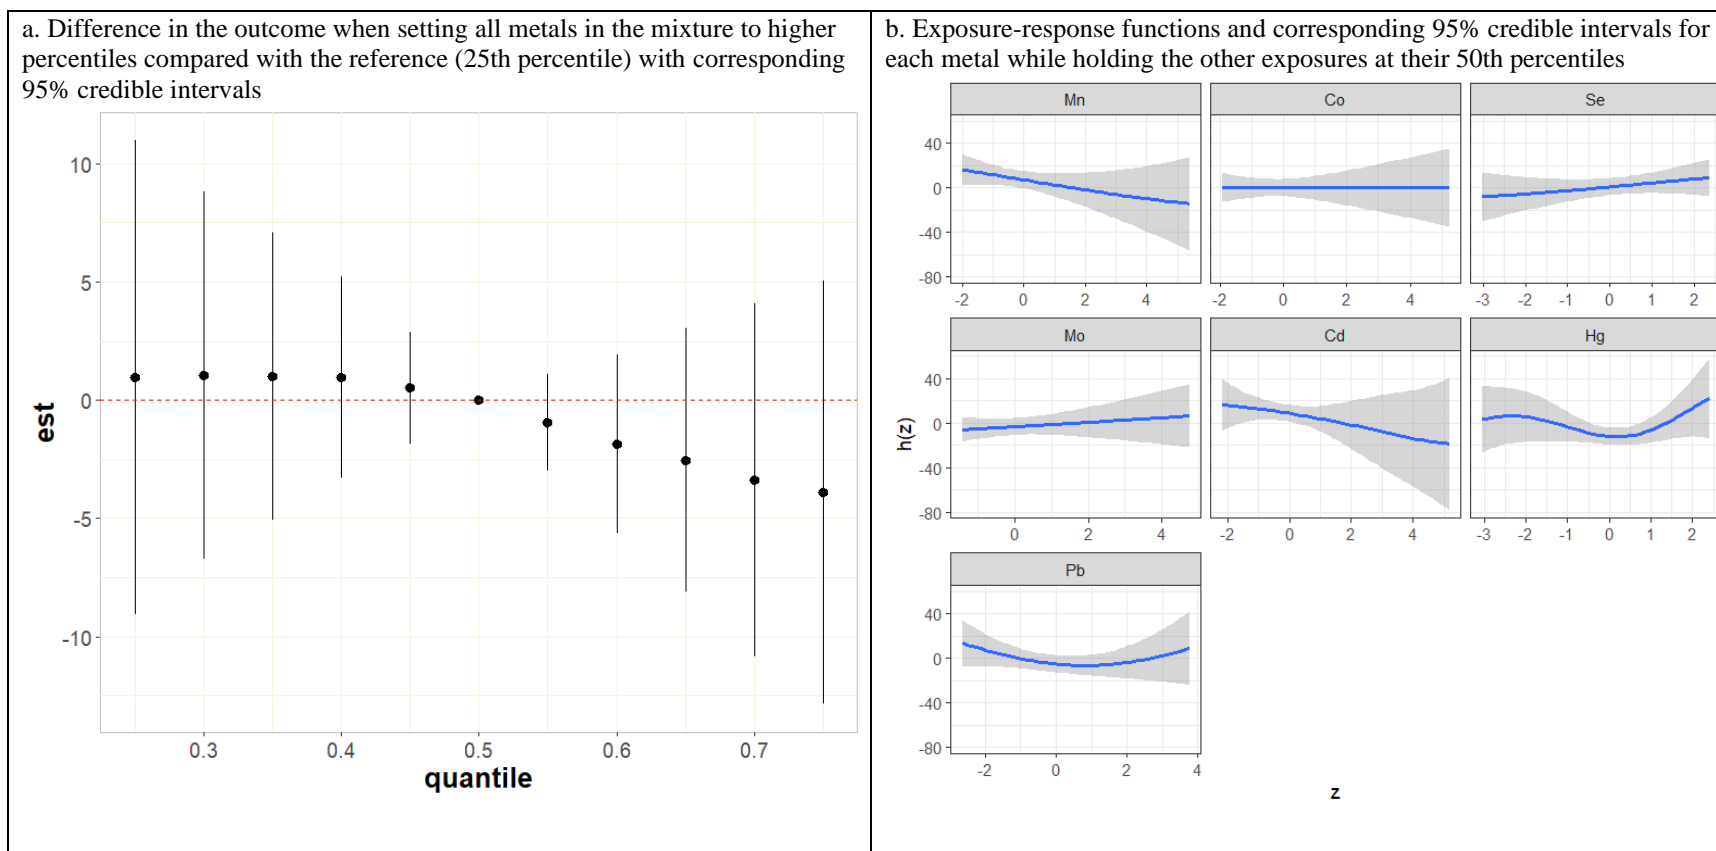

c. Exposure-response function for each metal exposure (column) with the second exposure (row) fixed at its 10th, 50th, and 90th percentiles, while holding the other exposures at their 50th percentiles

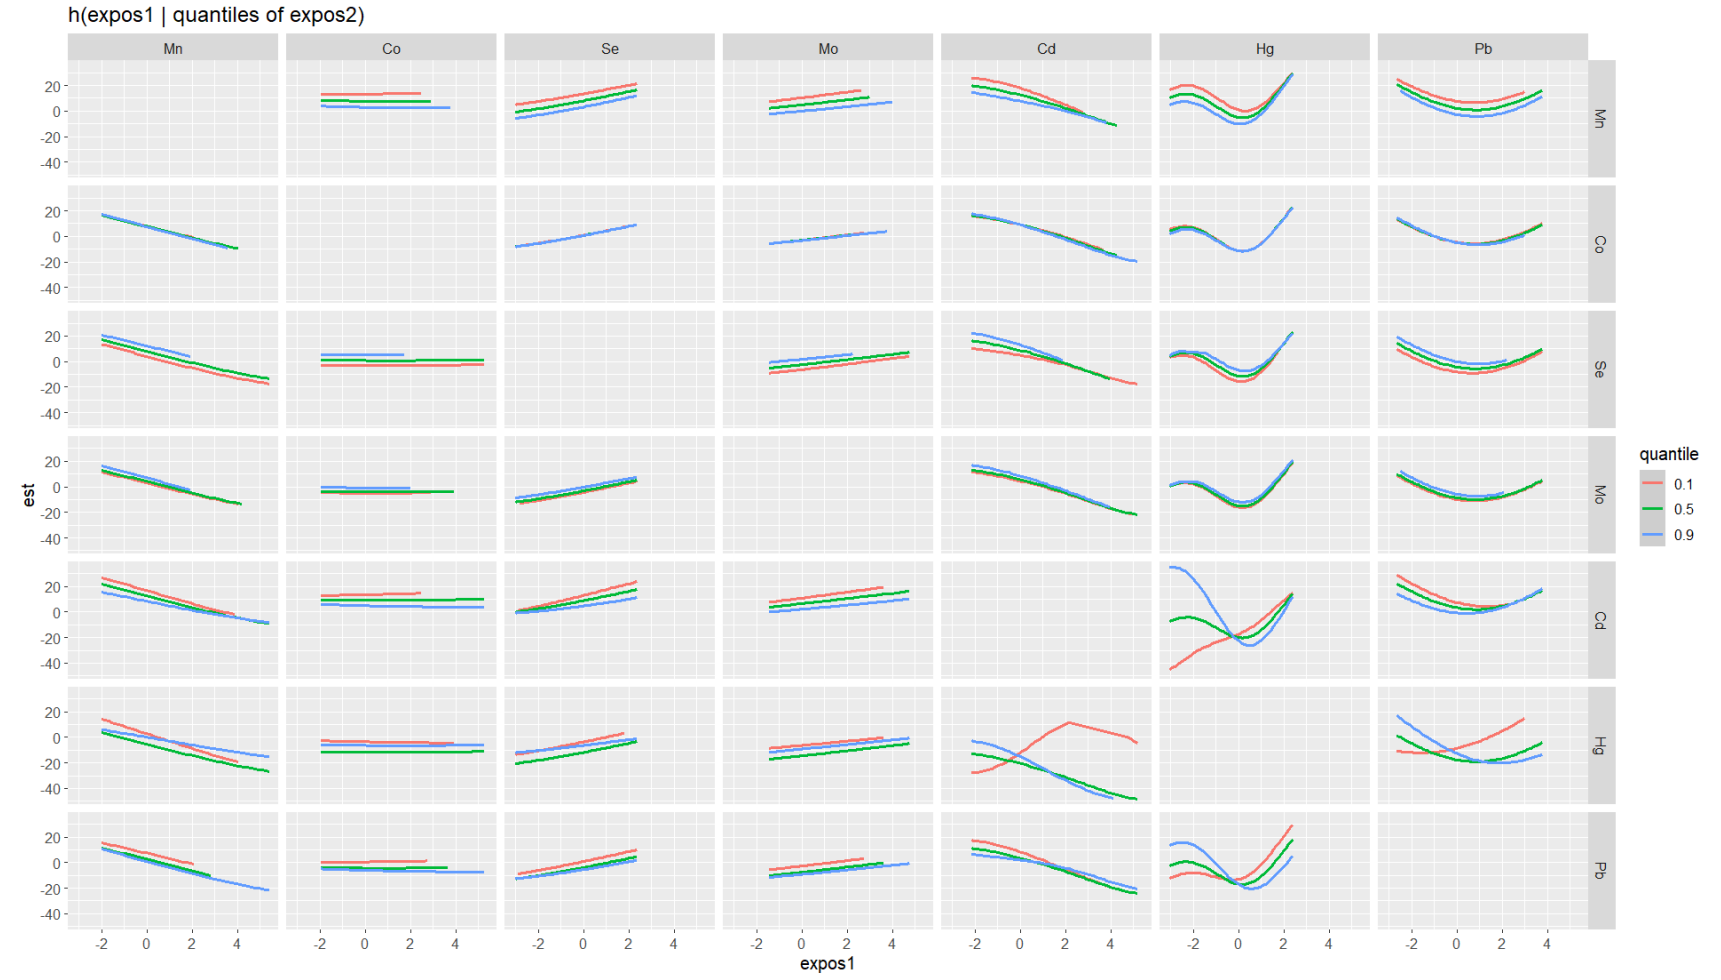

Abbreviations: Mn, manganese; Co, cobalt; Se, selenium; Mo, molybdenum; Cd, cadmium; Hg, mercury; Pb, lead. All models were adjusted for maternal education, child sex, child secondhand smoke exposure at 4 years of age, and child fish/seafood intake at 4 years of age.

Table S15. Difference in lipid measure levels setting all metals (Co, Mn, Mo, Se, Cd, Hg, and Pb) to their 75<sup>th</sup> compared with 25<sup>th</sup> percentile concentrations and holding all other metals in the mixture at their median values stratified by environmental tobacco smoke (ETS) exposure, estimated by BKMR

| Lipid measure                                | 75 <sup>th</sup> vs. 25 <sup>th</sup> percentiles |                               |
|----------------------------------------------|---------------------------------------------------|-------------------------------|
|                                              | Exposed to ETS<br>(n=138)                         | Not exposed to ETS<br>(n=153) |
| Total cholesterol (mg/dL)                    | 10.96 (1.09, 20.82)                               | 2.36 (-5.42, 10.14)           |
| Low-density lipoprotein cholesterol (mg/dL)  | 7.71 (-1.79, 17.22)                               | 1.10 (-4.66, 6.87)            |
| High-density lipoprotein cholesterol (mg/dL) | 0.74 (-2.15, 3.62)                                | 2.66 (-1.31, 6.62)            |
| Triglycerides (mg/dL)                        | 5.03 (-5.35, 15.40)                               | 0.52 (-4.80, 5.83)            |

All models were adjusted for maternal education, child sex, and child fish/seafood intake at 4 years of age.

Table S16. Posterior inclusion probabilities (PIP) and effect estimates for each metal, holding all other metals in the mixture constant at their median values, in association with lipid measures at 4 years of age, stratified by environmental tobacco smoke (ETS) exposure, estimated by BKMR

| Exposure                          | Total cholesterol |                                                               | Low-density lipoprotein cholesterol |                                                               | High-density lipoprotein cholesterol |                                                               | Triglycerides |                                                               |
|-----------------------------------|-------------------|---------------------------------------------------------------|-------------------------------------|---------------------------------------------------------------|--------------------------------------|---------------------------------------------------------------|---------------|---------------------------------------------------------------|
|                                   | PIP               | 75 <sup>th</sup> vs. 25 <sup>th</sup> percentile <sup>a</sup> | PIP                                 | 75 <sup>th</sup> vs. 25 <sup>th</sup> percentile <sup>a</sup> | PIP                                  | 75 <sup>th</sup> vs. 25 <sup>th</sup> percentile <sup>a</sup> | PIP           | 75 <sup>th</sup> vs. 25 <sup>th</sup> percentile <sup>a</sup> |
| <i>Exposed to ETS (n=138)</i>     |                   |                                                               |                                     |                                                               |                                      |                                                               |               |                                                               |
| Mn                                | 0.13              | 1.02 (-4.59, 6.63)                                            | 0.18                                | 1.01 (-3.89, 5.91)                                            | 0.03                                 | 0.05 (-0.70, 0.81)                                            | 0.11          | 0 (-2.84, 2.85)                                               |
| Co                                | 0.02              | 0.07 (-1.32, 1.47)                                            | 0.05                                | 0.06 (-1.37, 1.49)                                            | 0.05                                 | 0.06 (-0.76, 0.89)                                            | 0.09          | -0.11 (-2.56, 2.34)                                           |
| Se                                | 0.91              | 9.73 (0.93, 18.53)                                            | 0.78                                | 6.32 (-2.11, 14.75)                                           | 0.24                                 | 0.61 (-1.90, 3.12)                                            | 0.05          | 0.11 (-1.87, 2.09)                                            |
| Mo                                | 0.01              | 0.05 (-1.09, 1.18)                                            | 0.09                                | 0.33 (-2.31, 2.98)                                            | 0.01                                 | -0.01 (-0.32, 0.31)                                           | 0.06          | 0.15 (-2.08, 2.38)                                            |
| Cd                                | 0.05              | 0.14 (-1.90, 2.18)                                            | 0.19                                | 0.44 (-2.92, 3.79)                                            | 0.02                                 | -0.04 (-0.71, 0.63)                                           | 0.59          | 4.64 (-4.98, 14.26)                                           |
| Hg                                | <0.01             | 0.00 (0.00, 0.00)                                             | 0.04                                | 0.00 (-1.20, 1.19)                                            | 0.01                                 | 0.00 (-0.18, 0.18)                                            | 0.07          | 0.12 (-1.98, 2.21)                                            |
| Pb                                | 0.07              | 0.42 (-3.38, 4.22)                                            | 0.05                                | 0.13 (-1.85, 2.11)                                            | 0.05                                 | 0.06 (-0.82, 0.94)                                            | 0.07          | 0.09 (-2.30, 2.48)                                            |
| <i>Not exposed to ETS (n=153)</i> |                   |                                                               |                                     |                                                               |                                      |                                                               |               |                                                               |
| Mn                                | 0.02              | -0.05 (-1.12, 1.01)                                           | 0.01                                | 0 (-0.37, 0.36)                                               | 0.04                                 | -0.04 (-0.63, 0.56)                                           | 0.04          | -0.04 (-1.20, 1.12)                                           |
| Co                                | <0.01             | 0 (-0.35, 0.34)                                               | 0.04                                | -0.04 (-1.08, 0.99)                                           | 0.03                                 | 0.01 (-0.49, 0.51)                                            | 0.07          | 0.04 (-1.69, 1.77)                                            |
| Se                                | 0.12              | 0.69 (-3.76, 5.14)                                            | 0.15                                | 0.87 (-3.93, 5.67)                                            | 0.04                                 | -0.02 (-0.65, 0.61)                                           | 0.12          | 0.31 (-2.46, 3.07)                                            |
| Mo                                | 0.02              | 0.02 (-0.72, 0.77)                                            | 0.04                                | 0.15 (-1.56, 1.86)                                            | 0.34                                 | -0.81 (-3.52, 1.89)                                           | 0.07          | 0.16 (-1.82, 2.14)                                            |
| Cd                                | 0.11              | 0.07 (-1.83, 1.97)                                            | 0.18                                | -0.04 (-2.25, 2.18)                                           | 0.09                                 | 0.10 (-0.87, 1.06)                                            | 0.13          | -0.22 (-2.36, 1.91)                                           |
| Hg                                | 0.02              | 0.04 (-1.00, 1.08)                                            | 0.06                                | 0.11 (-1.31, 1.52)                                            | 0.03                                 | -0.02 (-0.46, 0.42)                                           | 0.12          | 0.34 (-2.52, 3.20)                                            |
| Pb                                | 0.26              | 1.76 (-4.81, 8.33)                                            | 0.08                                | 0.30 (-2.21, 2.80)                                            | 0.88                                 | 2.72 (-0.73, 6.17)                                            | 0.04          | 0.00 (-1.40, 1.39)                                            |

<sup>a</sup> The difference in the lipid measure when setting each metal component to its 75<sup>th</sup> percentile versus 25<sup>th</sup> percentile, while holding all other metals constant at their median values.

Abbreviations: Mn, manganese; Co, cobalt; Se, selenium; Mo, molybdenum; Cd, cadmium; Hg, mercury; Pb, lead. All models were adjusted for maternal education, child sex, and child fish/seafood intake at 4 years of age.

Figure S32. Joint associations of the metals with total cholesterol at 4 years of age among children exposed to secondhand smoke at 4 years of age, estimated by BKMR (n=138)

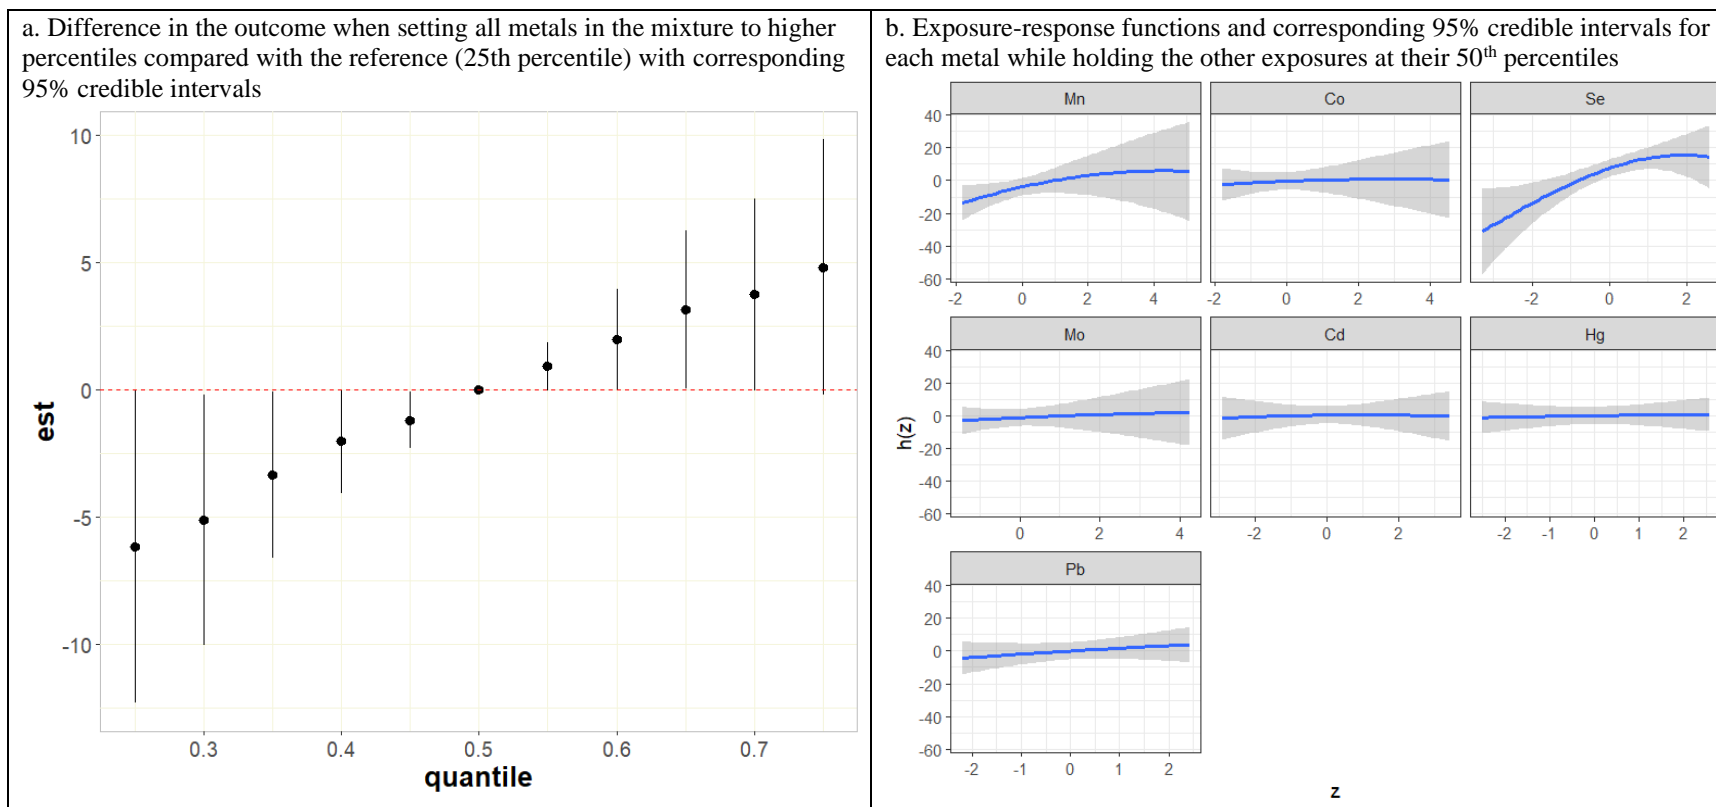



c. Exposure-response function for each metal exposure (column) with the second exposure (row) fixed at its 10<sup>th</sup>, 50<sup>th</sup>, and 90<sup>th</sup> percentiles, while holding the other exposures at their 50<sup>th</sup> percentiles

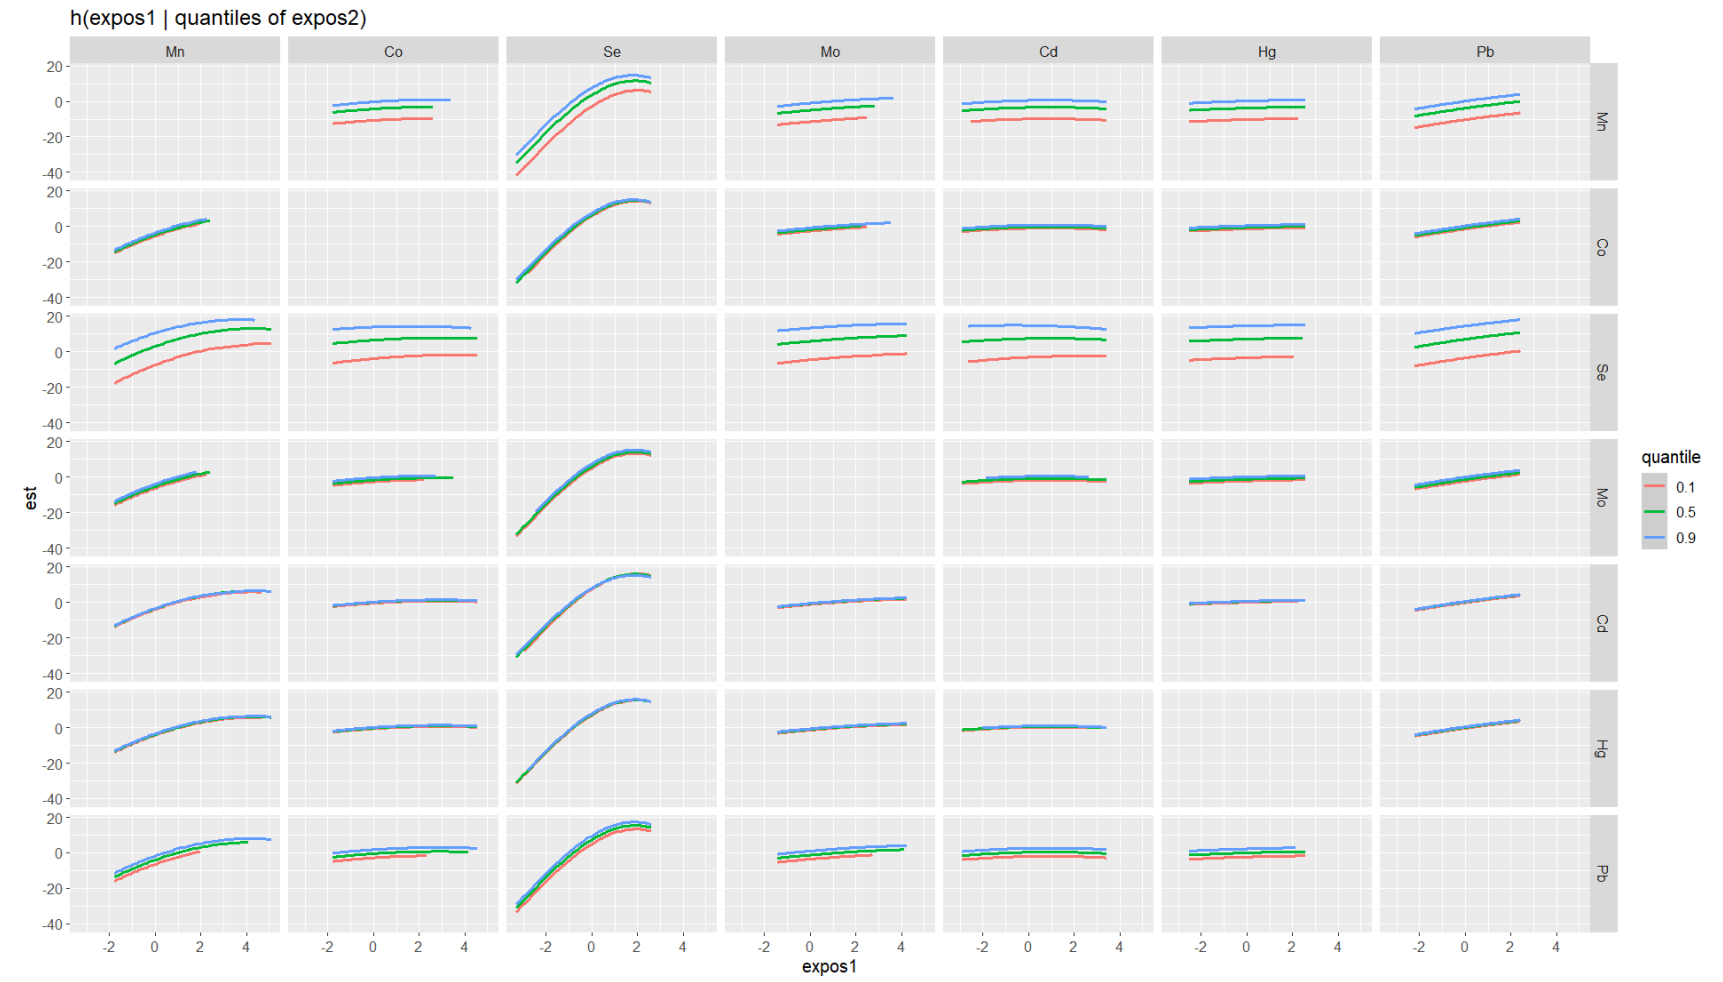

Abbreviations: Mn, manganese; Co, cobalt; Se, selenium; Mo, molybdenum; Cd, cadmium; Hg, mercury; Pb, lead. All models were adjusted for maternal education, child sex, and child fish/seafood intake at 4 years of age.

Figure S33. Joint associations of the metals with low-density lipoprotein cholesterol at 4 years of age among children exposed to secondhand smoke at 4 years of age, estimated by BKMR (n=138)

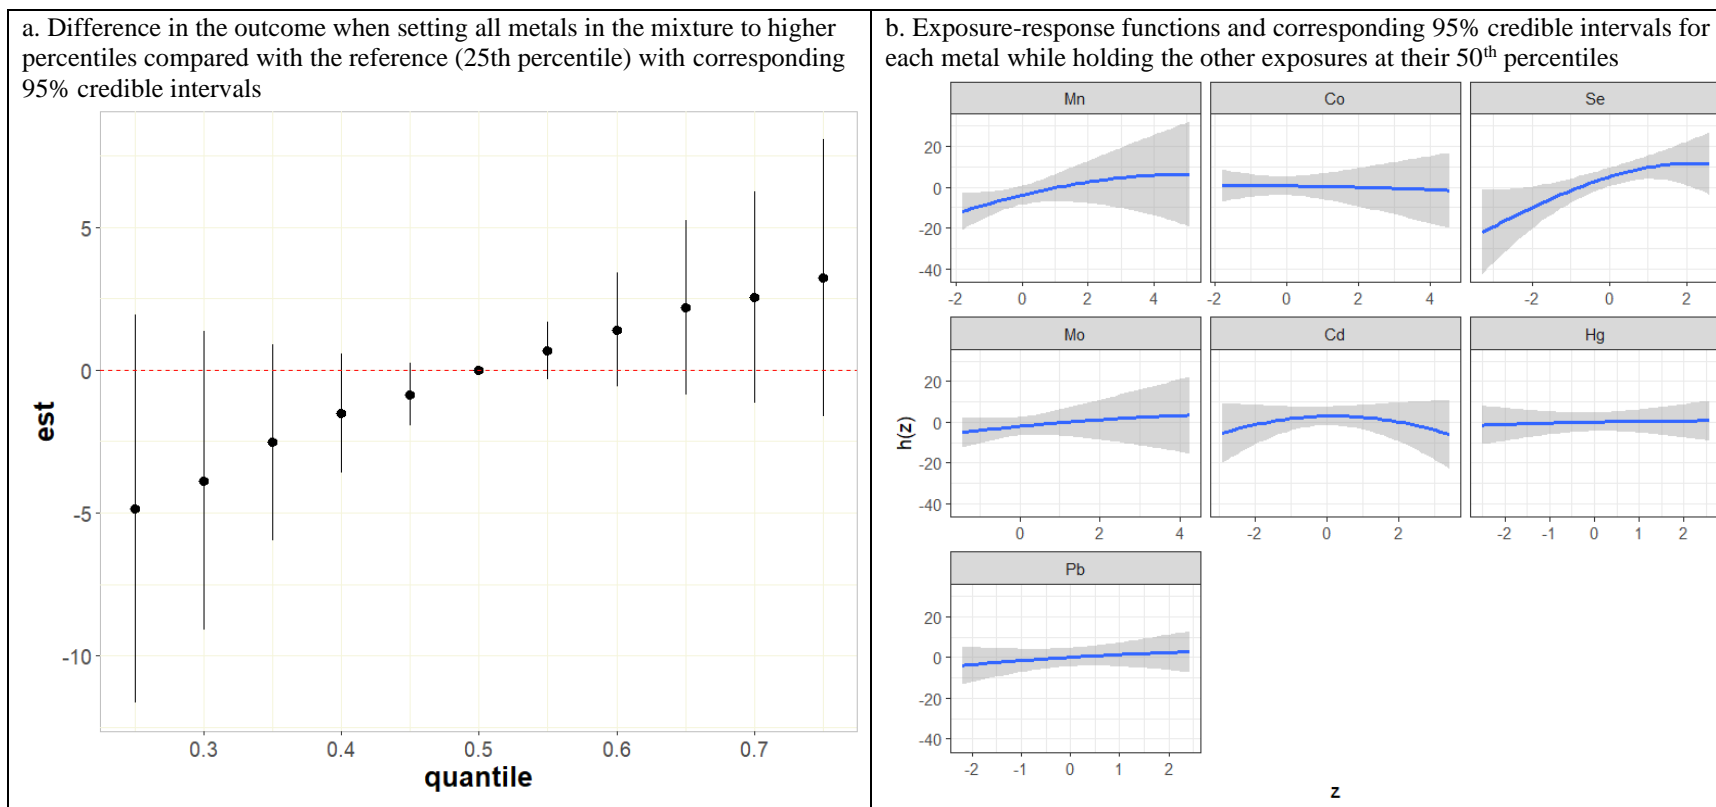

c. Exposure-response function for each metal exposure (column) with the second exposure (row) fixed at its 10<sup>th</sup>, 50<sup>th</sup>, and 90<sup>th</sup> percentiles, while holding the other exposures at their 50<sup>th</sup> percentiles

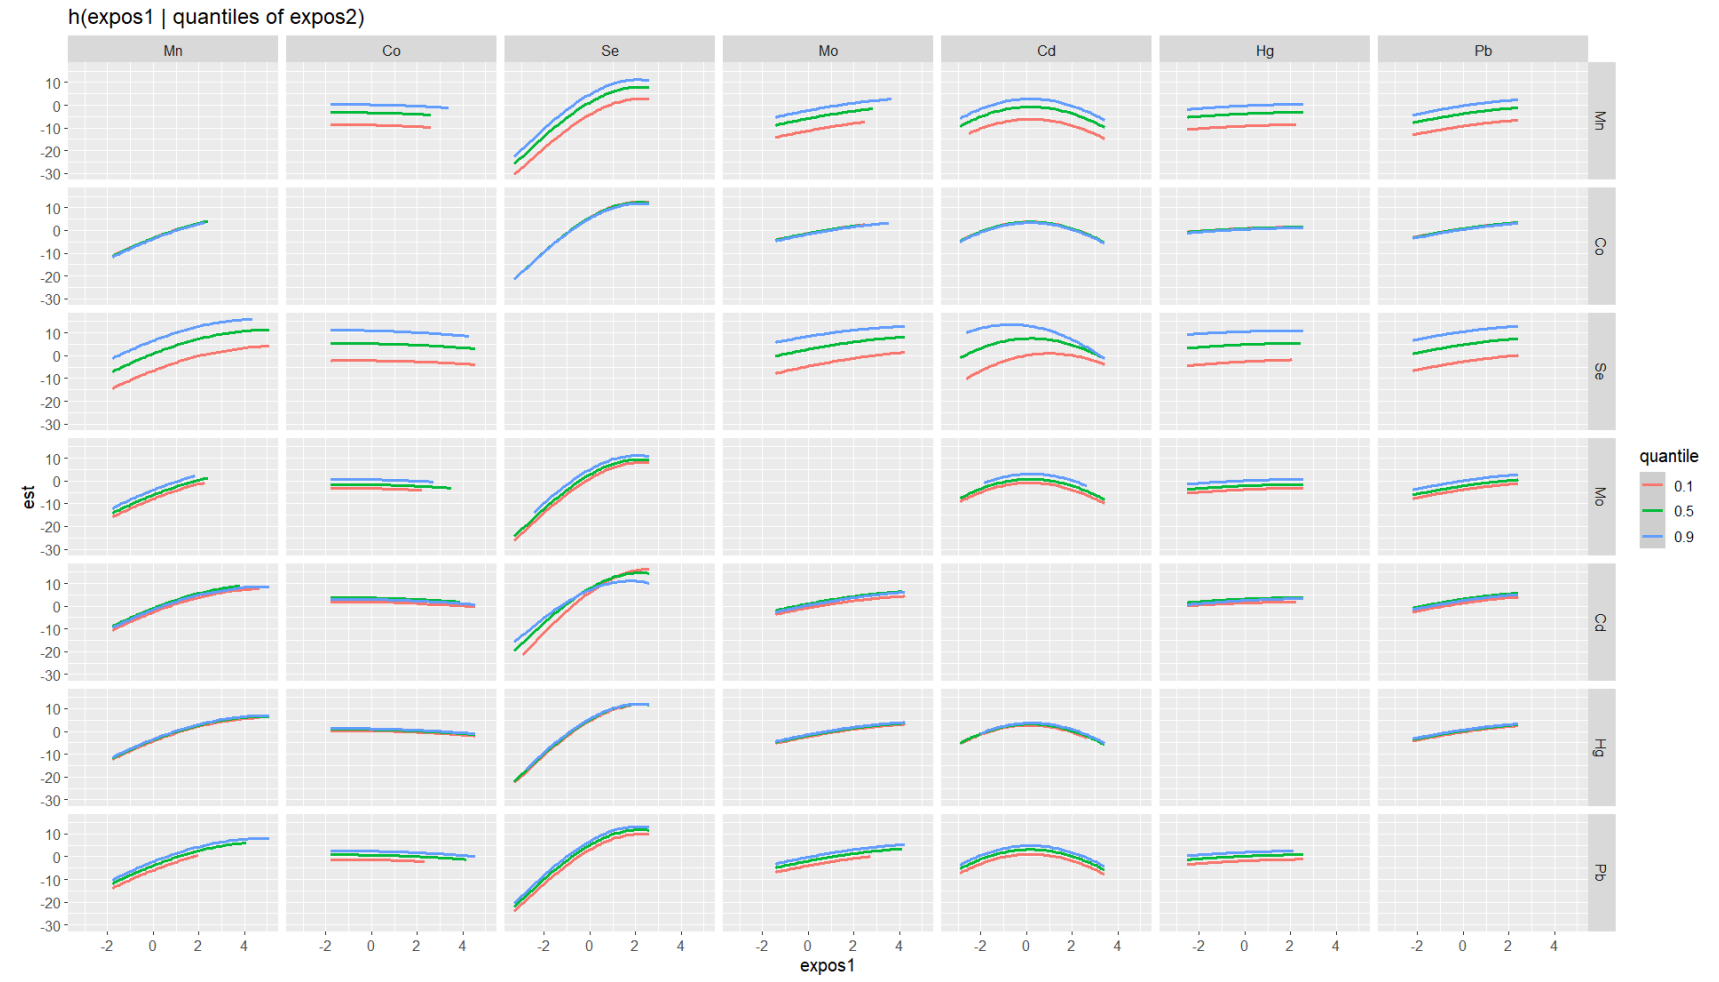

Abbreviations: Mn, manganese; Co, cobalt; Se, selenium; Mo, molybdenum; Cd, cadmium; Hg, mercury; Pb, lead. All models were adjusted for maternal education, child sex, and child fish/seafood intake at 4 years of age.

Figure S34. Joint associations of the metals with high-density lipoprotein cholesterol at 4 years of age among children exposed to secondhand smoke at 4 years of age, estimated by BKMR (n=138)

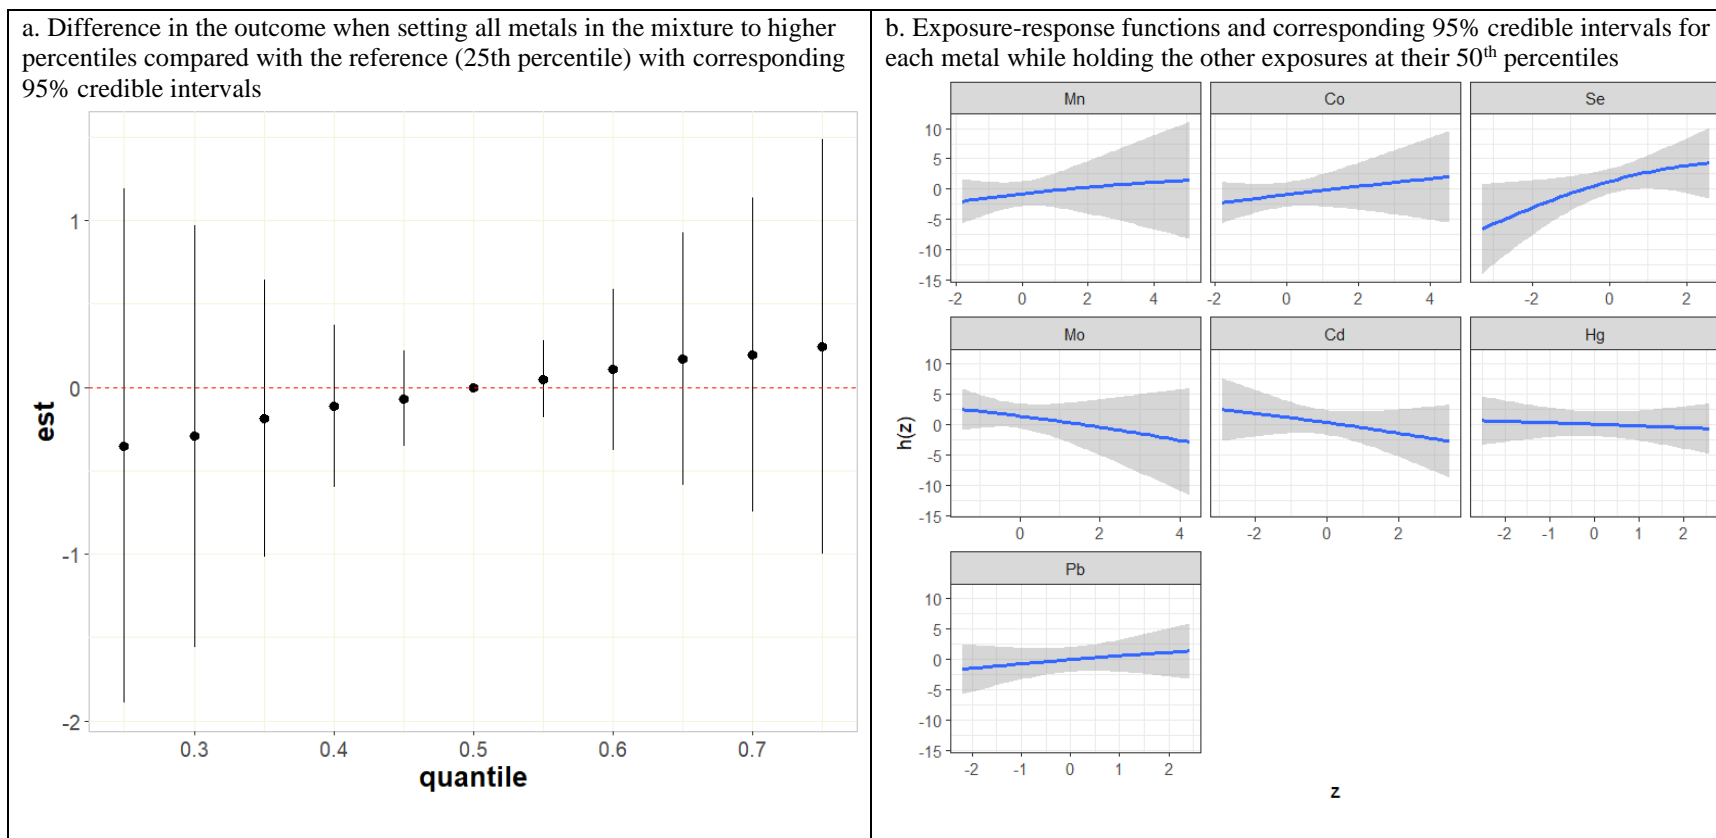

c. Exposure-response function for each metal exposure (column) with the second exposure (row) fixed at its 10<sup>th</sup>, 50<sup>th</sup>, and 90<sup>th</sup> percentiles, while holding the other exposures at their 50<sup>th</sup> percentiles

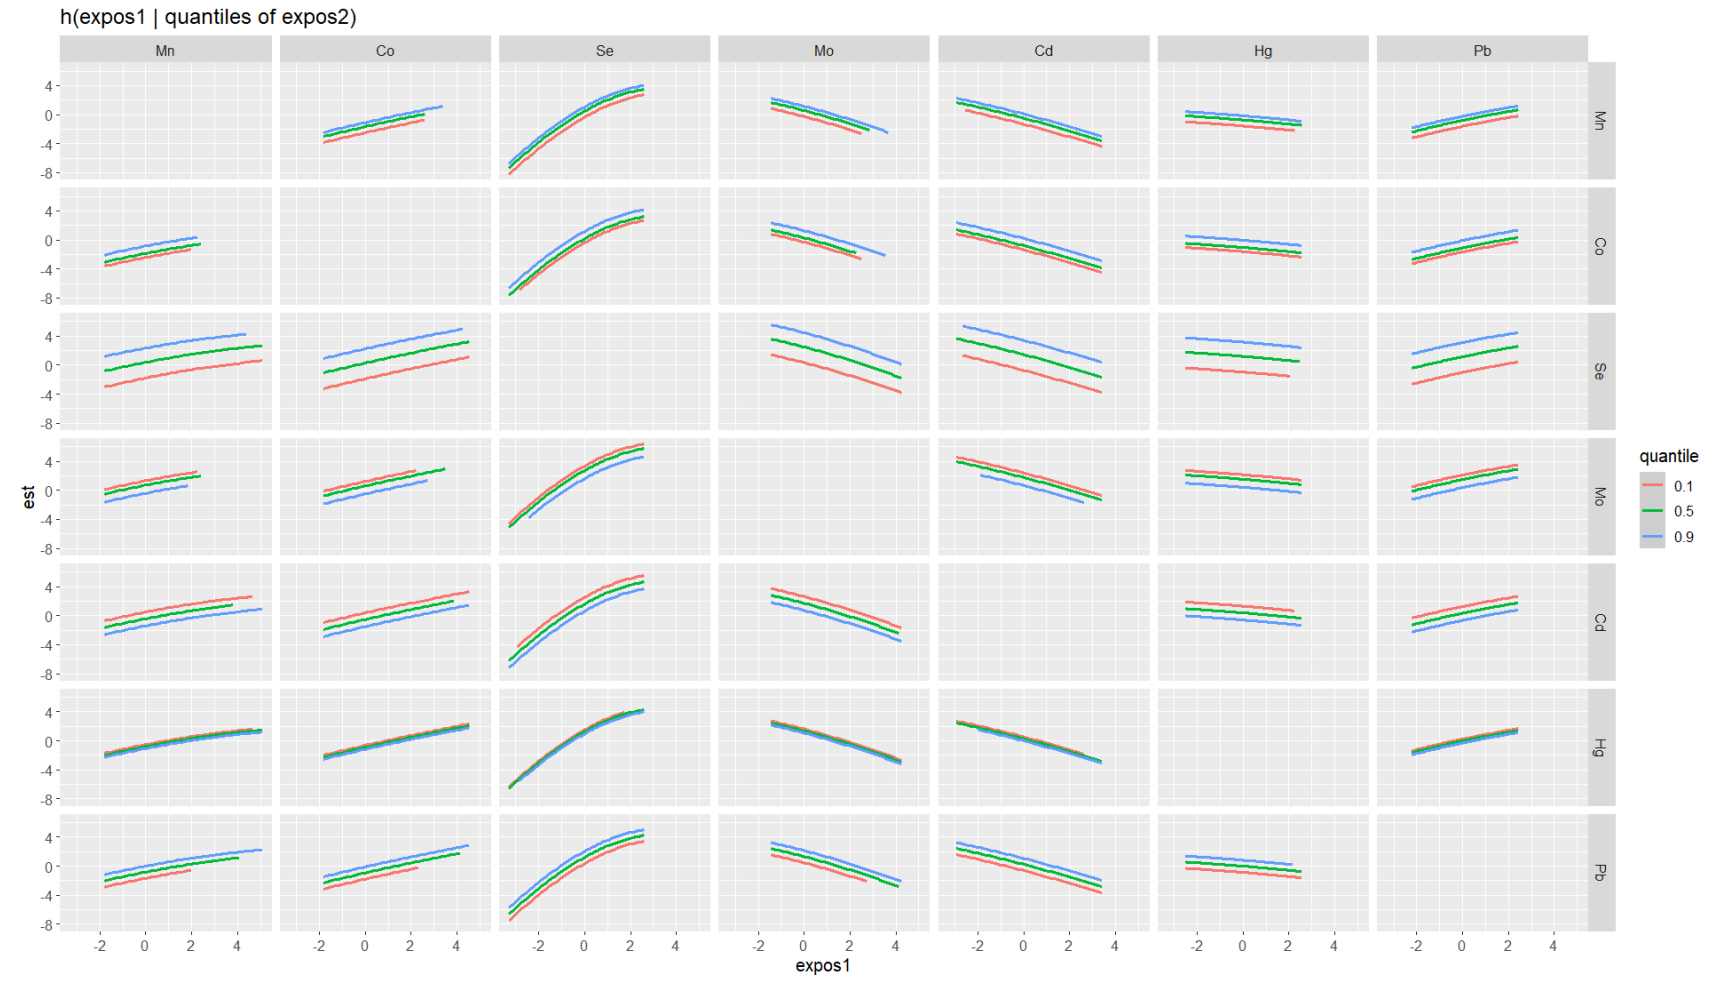

Abbreviations: Mn, manganese; Co, cobalt; Se, selenium; Mo, molybdenum; Cd, cadmium; Hg, mercury; Pb, lead. All models were adjusted for maternal education, child sex, and child fish/seafood intake at 4 years of age.

Figure S35. Joint associations of the metals with triglycerides at 4 years of age among children exposed to secondhand smoke at 4 years of age, estimated by BKMR (n=138)

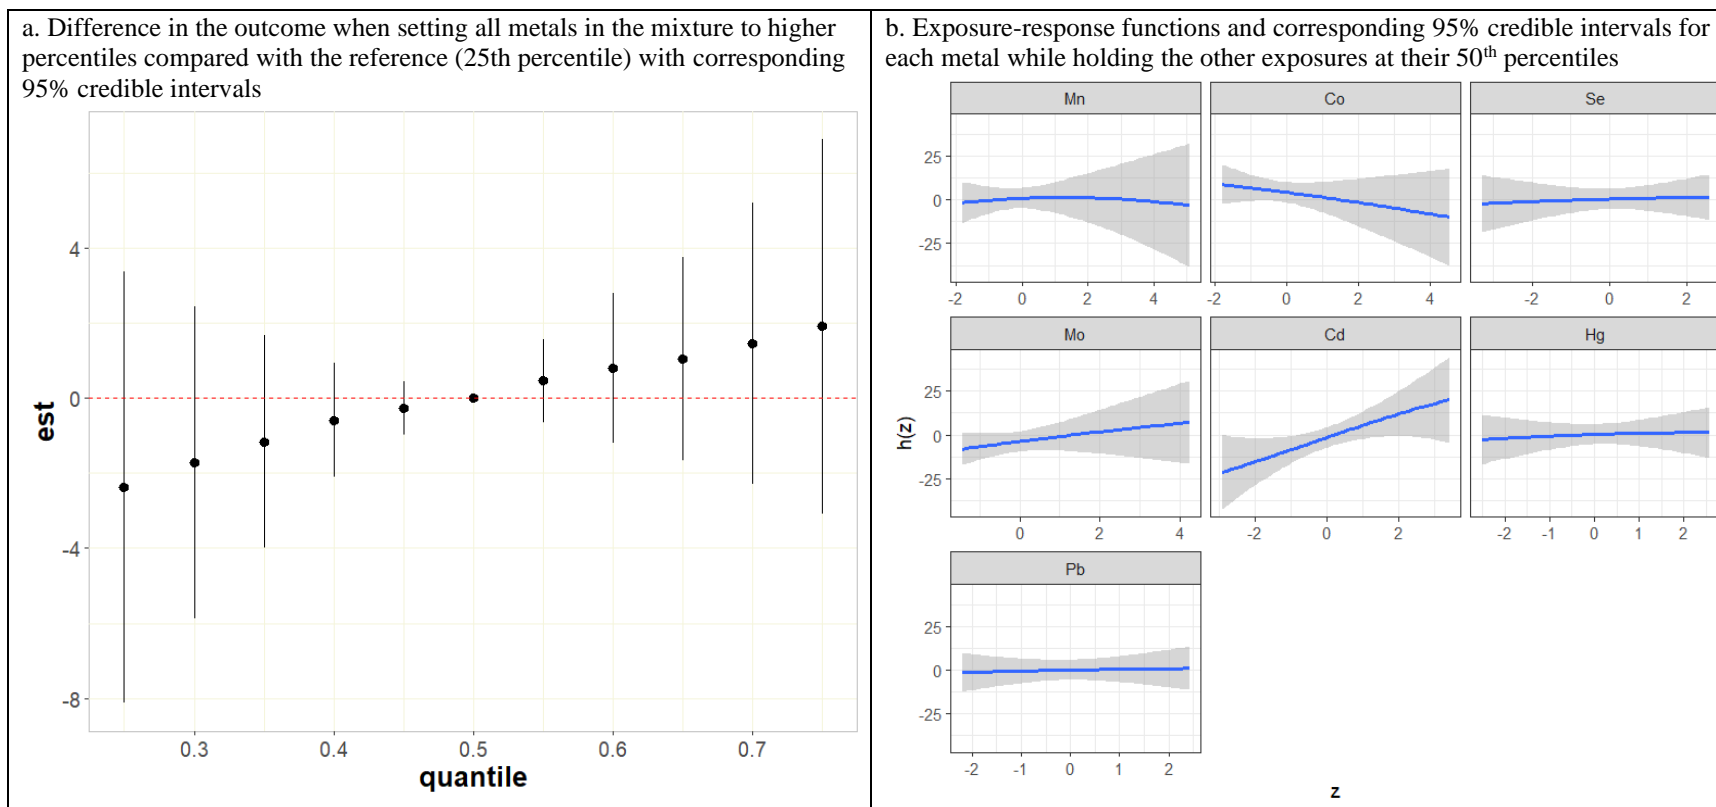

c. Exposure-response function for each metal exposure (column) with the second exposure (row) fixed at its 10<sup>th</sup>, 50<sup>th</sup>, and 90<sup>th</sup> percentiles, while holding the other exposures at their 50<sup>th</sup> percentiles

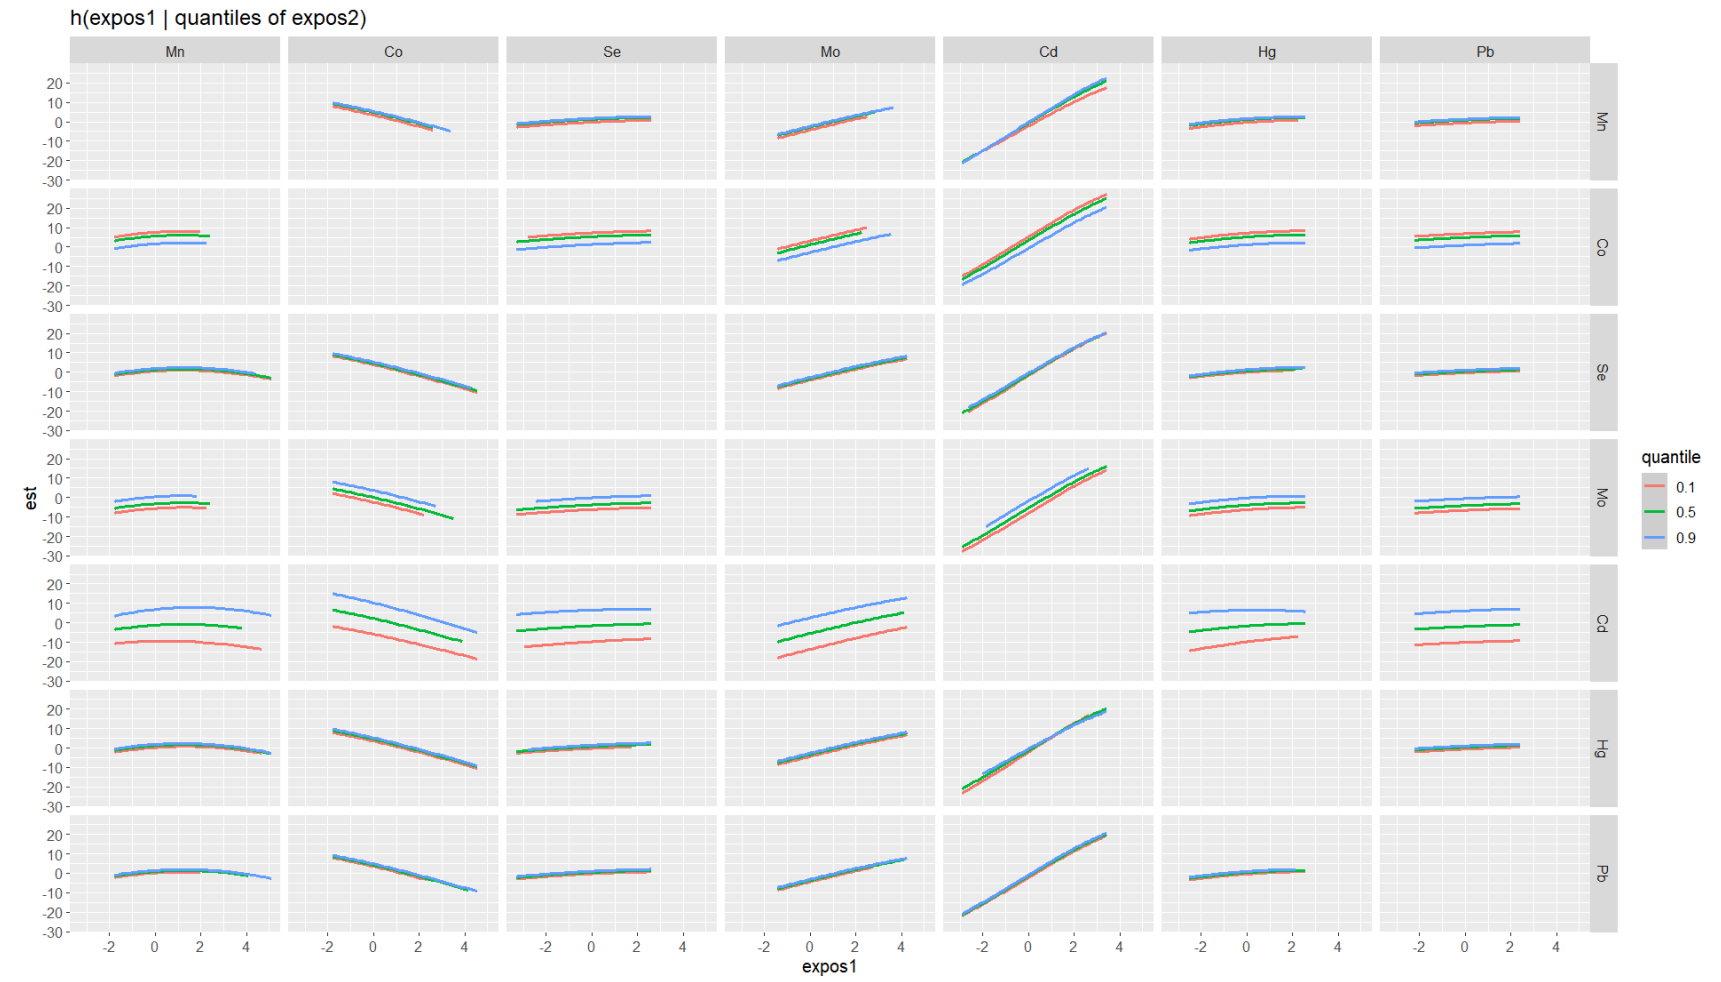

Abbreviations: Mn, manganese; Co, cobalt; Se, selenium; Mo, molybdenum; Cd, cadmium; Hg, mercury; Pb, lead. All models were adjusted for maternal education, child sex, and child fish/seafood intake at 4 years of age.

Figure S36. Joint associations of the metals with total cholesterol at 4 years of age among children not exposed to secondhand smoke at 4 years of age, estimated by BKMR (n=153)

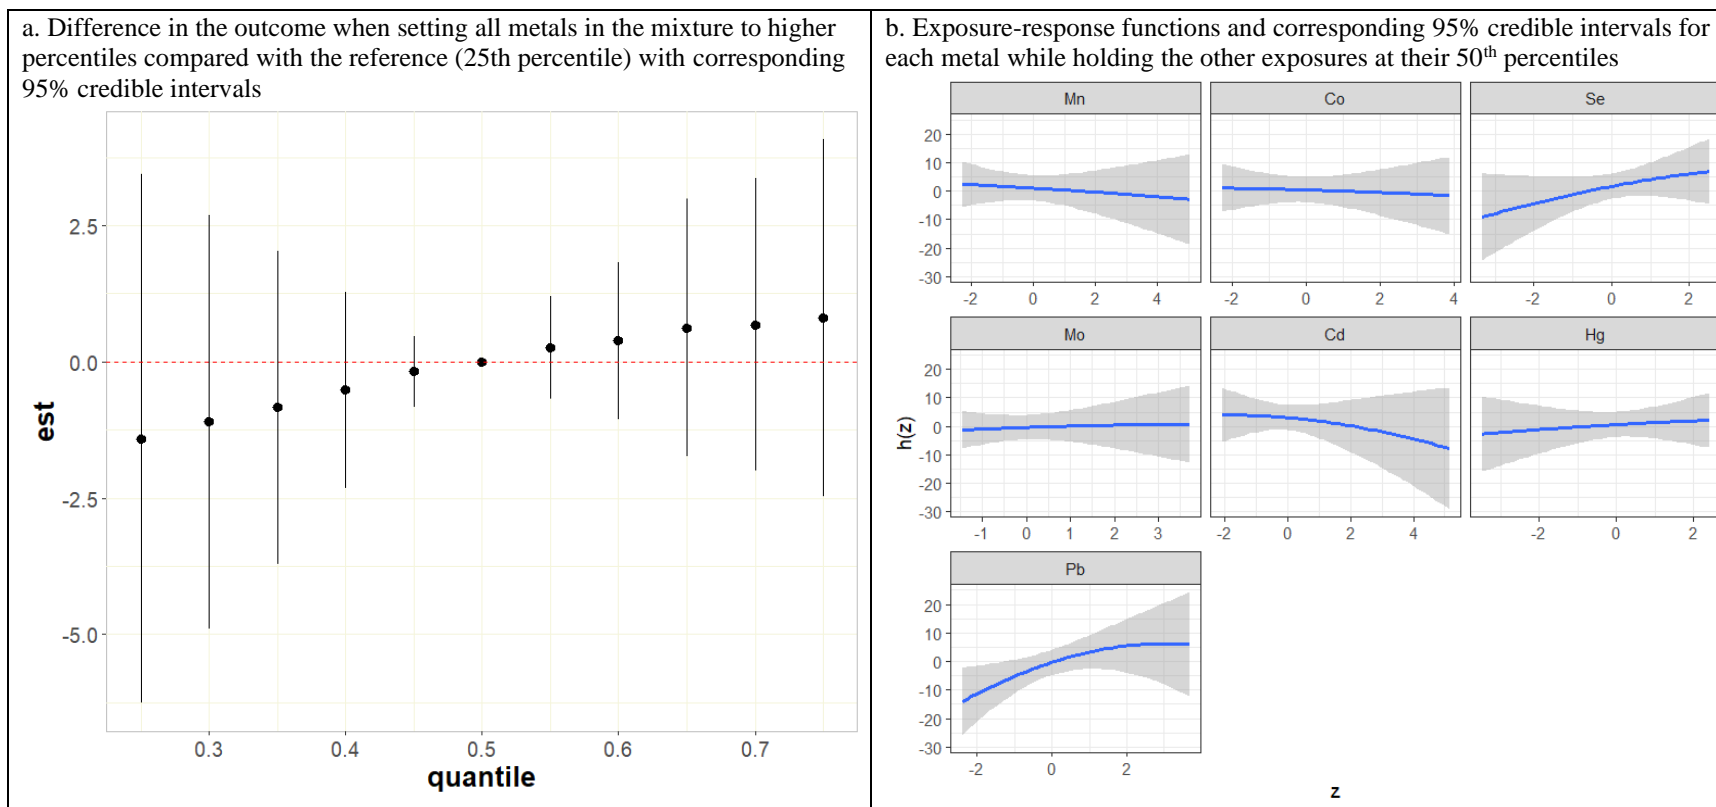



c. Exposure-response function for each metal exposure (column) with the second exposure (row) fixed at its 10th, 50th, and 90th percentiles, while holding the other exposures at their 50th percentiles

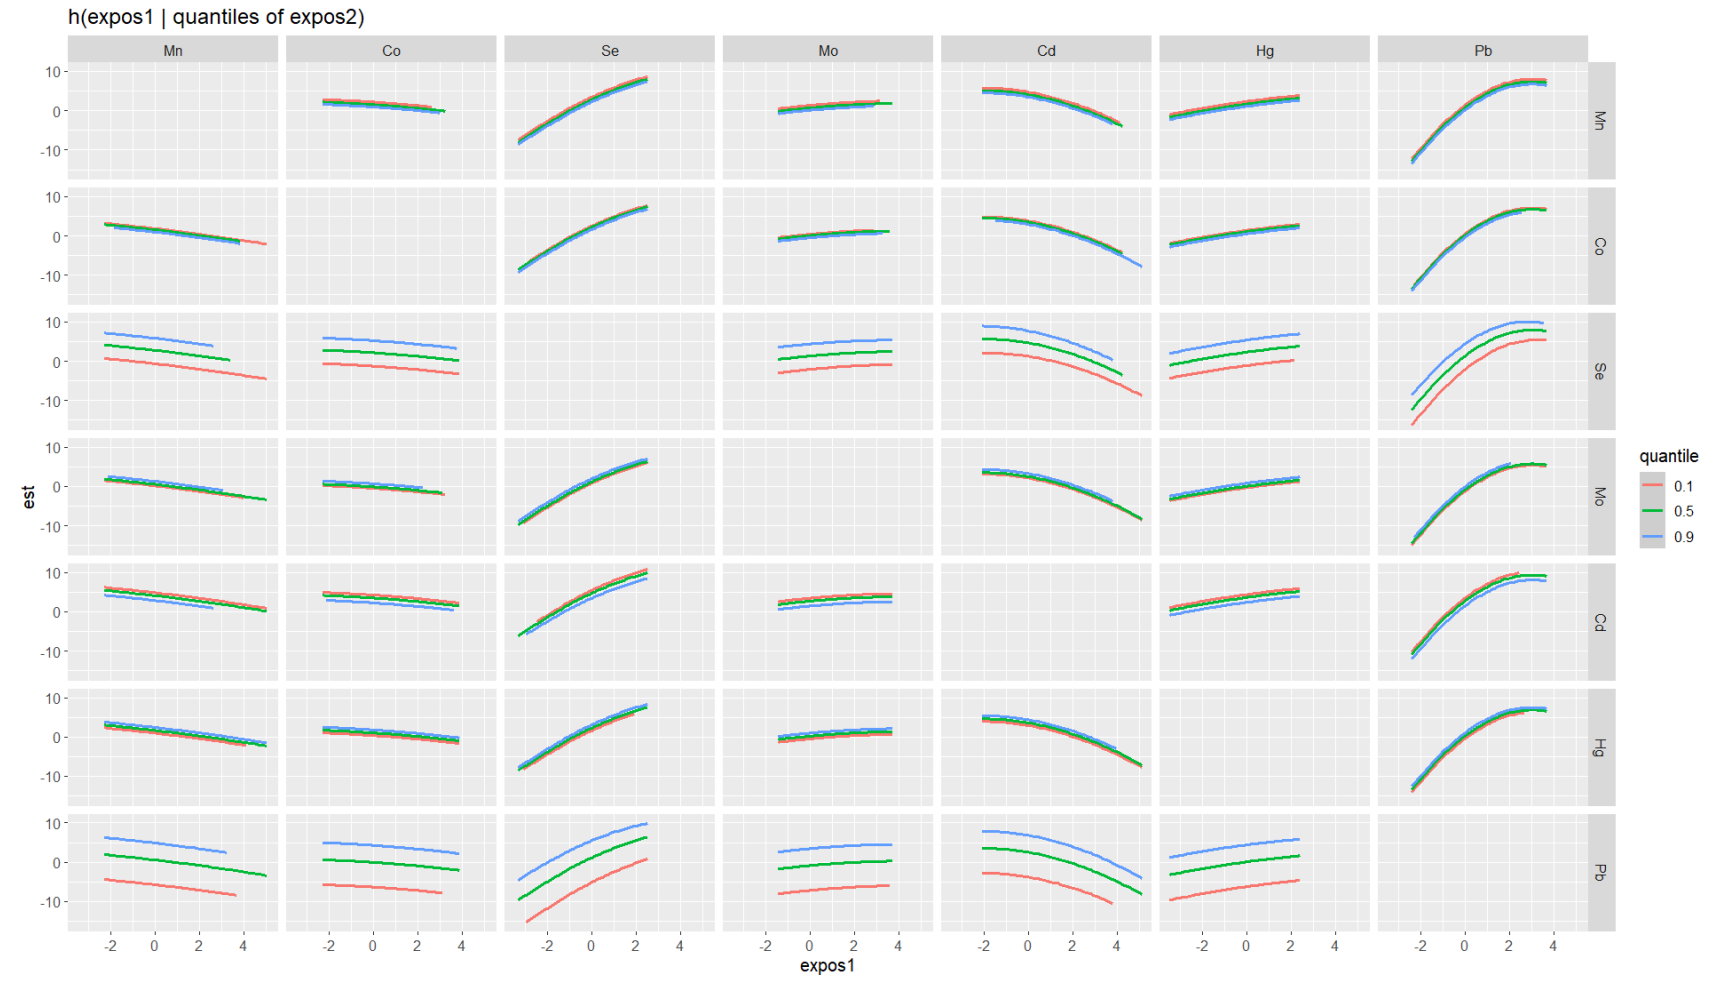

Abbreviations: Mn, manganese; Co, cobalt; Se, selenium; Mo, molybdenum; Cd, cadmium; Hg, mercury; Pb, lead. All models were adjusted for maternal education, child sex, and child fish/seafood intake at 4 years of age.

Figure S37. Joint associations of the metals with low-density lipoprotein cholesterol at 4 years of age among children not exposed to secondhand smoke at 4 years of age, estimated by BKMR (n=153)

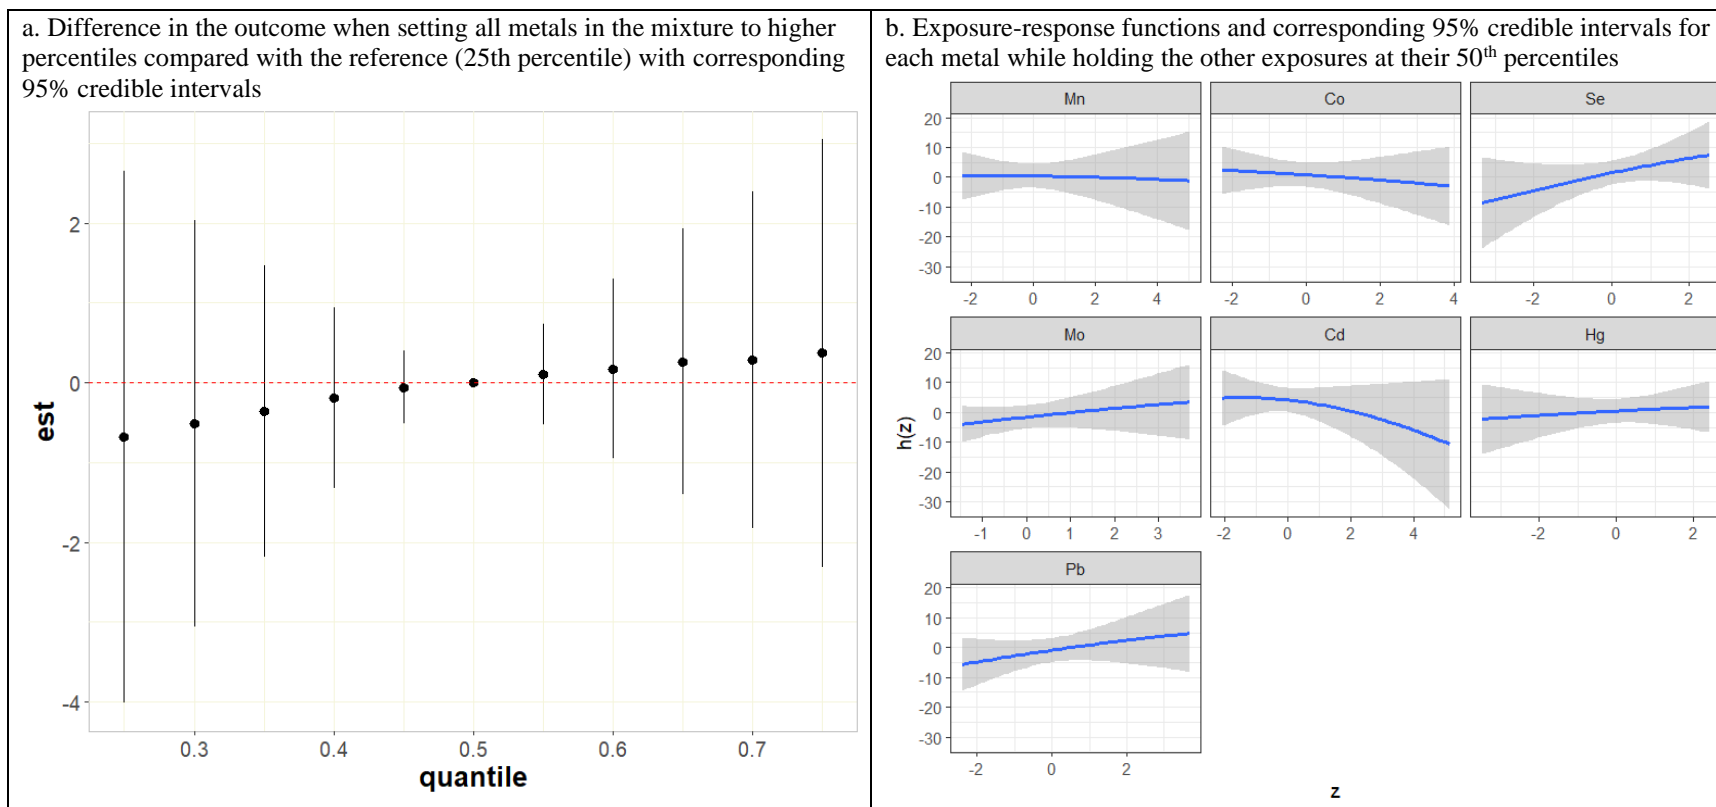

c. Exposure-response function for each metal exposure (column) with the second exposure (row) fixed at its 10<sup>th</sup>, 50<sup>th</sup>, and 90<sup>th</sup> percentiles, while holding the other exposures at their 50<sup>th</sup> percentiles

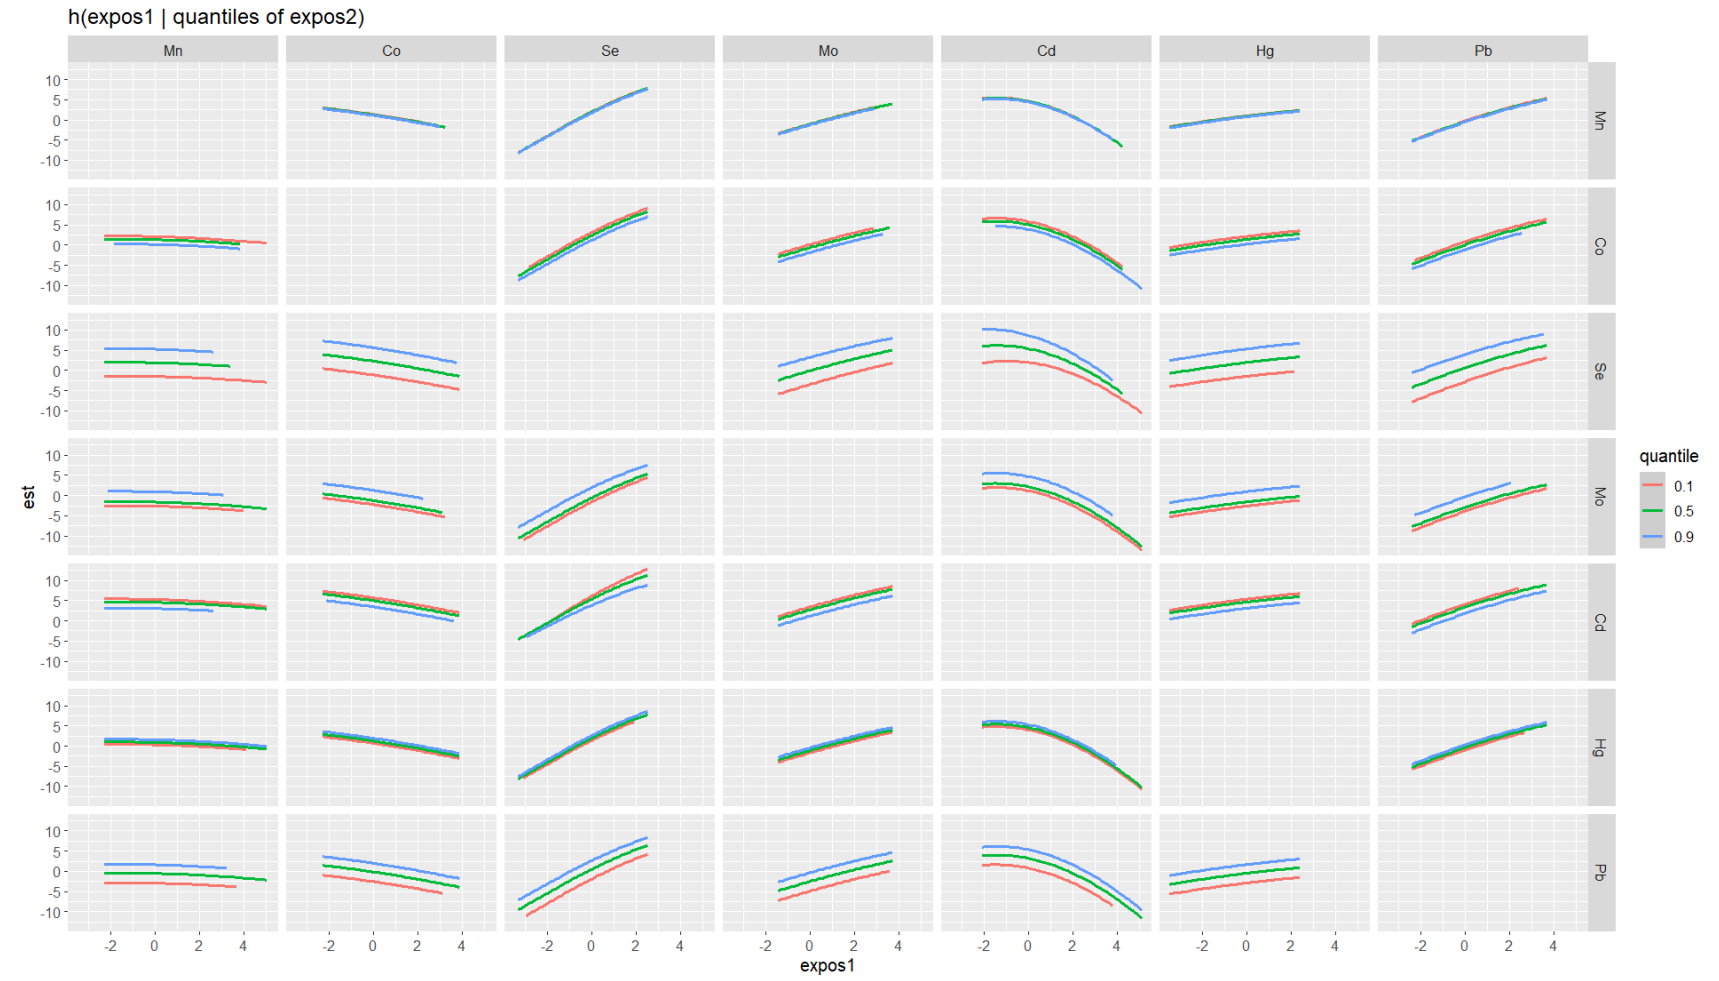

Abbreviations: Mn, manganese; Co, cobalt; Se, selenium; Mo, molybdenum; Cd, cadmium; Hg, mercury; Pb, lead. All models were adjusted for maternal education, child sex, and child fish/seafood intake at 4 years of age.

Figure S38. Joint associations of the metals with high-density lipoprotein cholesterol at 4 years of age among children not exposed to secondhand smoke at 4 years of age, estimated by BKMR (n=153)

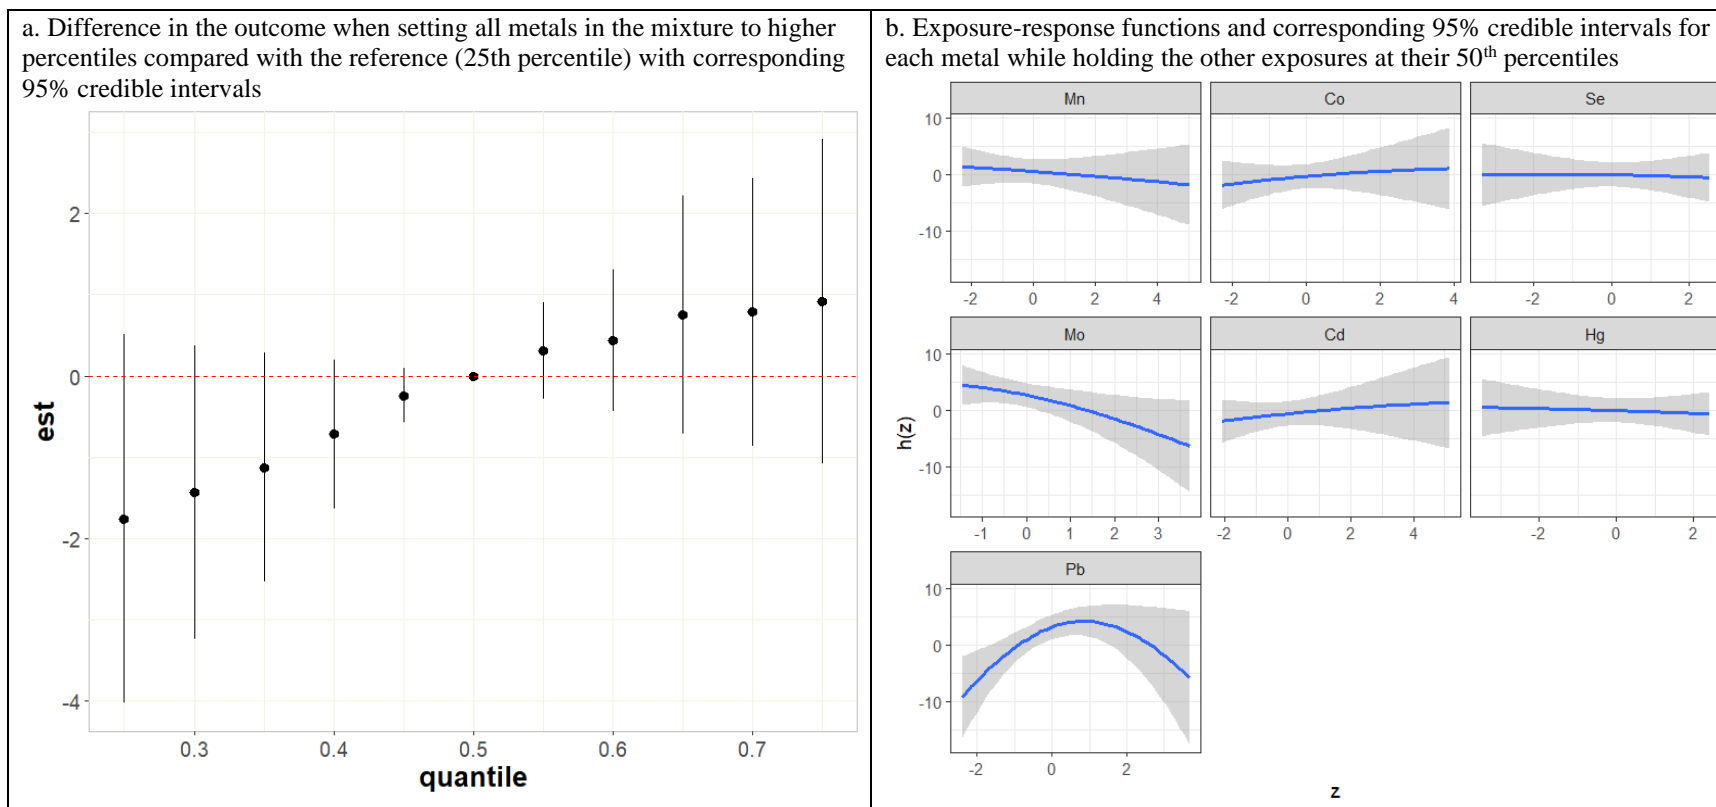

c. Exposure-response function for each metal exposure (column) with the second exposure (row) fixed at its 10<sup>th</sup>, 50<sup>th</sup>, and 90<sup>th</sup> percentiles, while holding the other exposures at their 50<sup>th</sup> percentiles

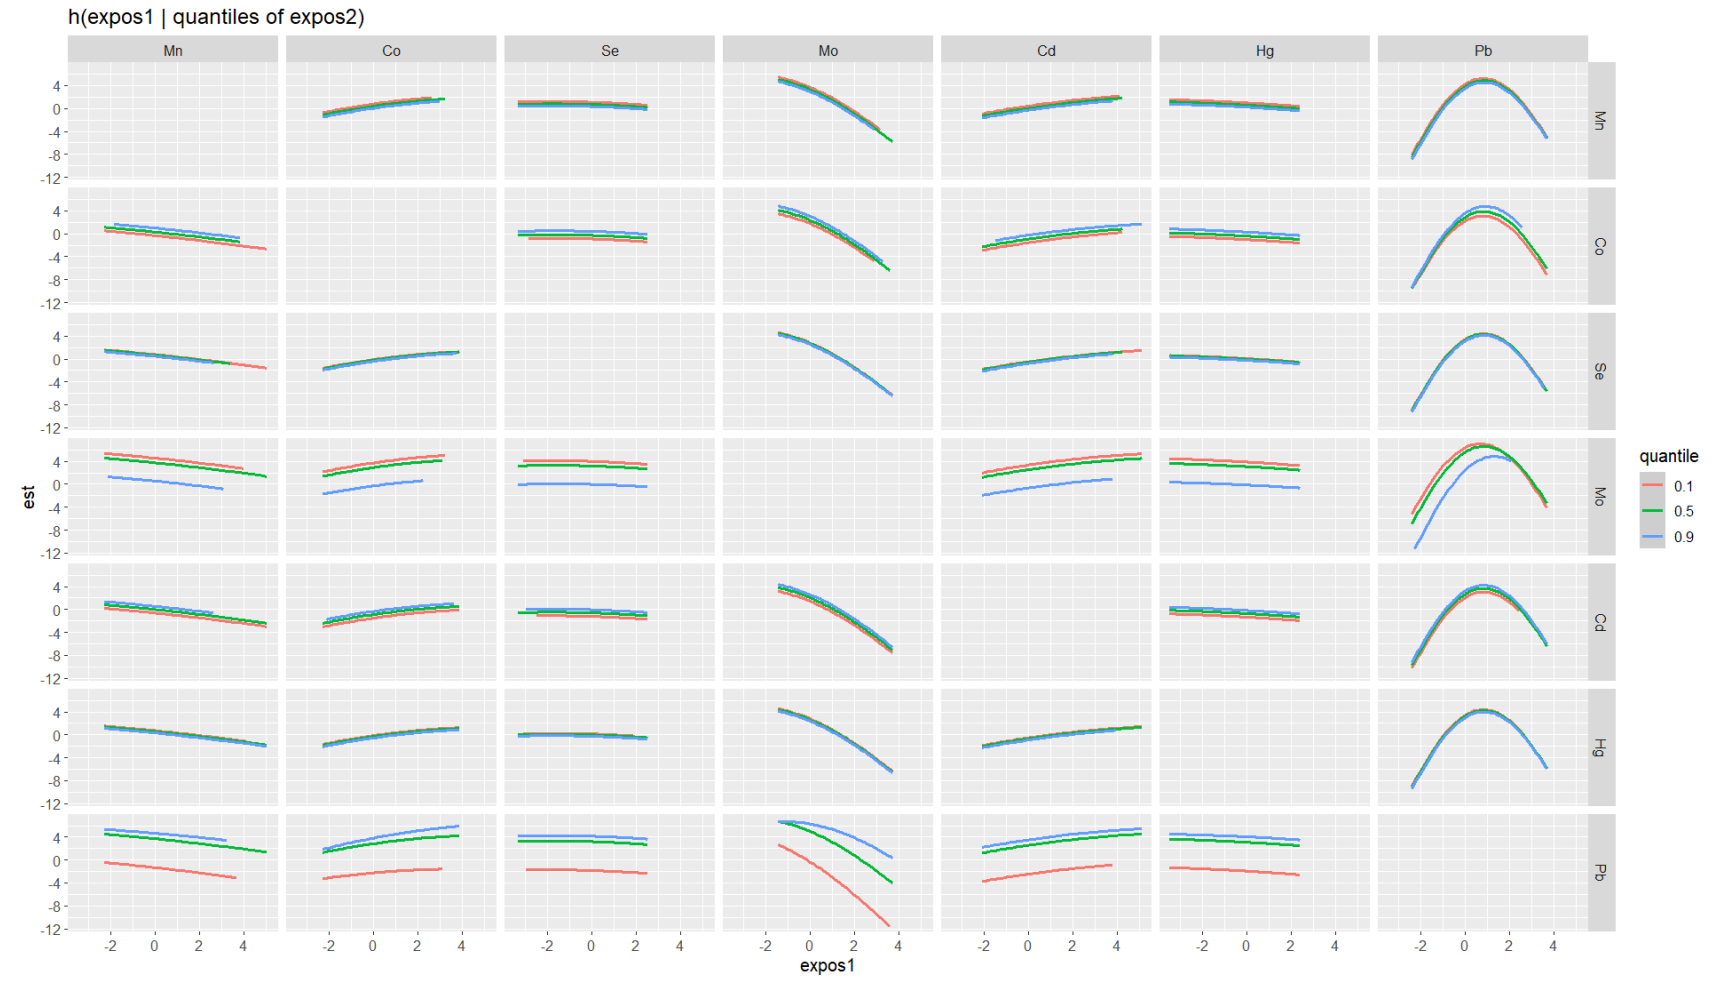

Abbreviations: Mn, manganese; Co, cobalt; Se, selenium; Mo, molybdenum; Cd, cadmium; Hg, mercury; Pb, lead. All models were adjusted for maternal education, child sex, and child fish/seafood intake at 4 years of age.

Figure S39. Joint associations of the metals with triglycerides at 4 years of age among children not exposed to secondhand smoke at 4 years of age, estimated by BKMR (n=153)

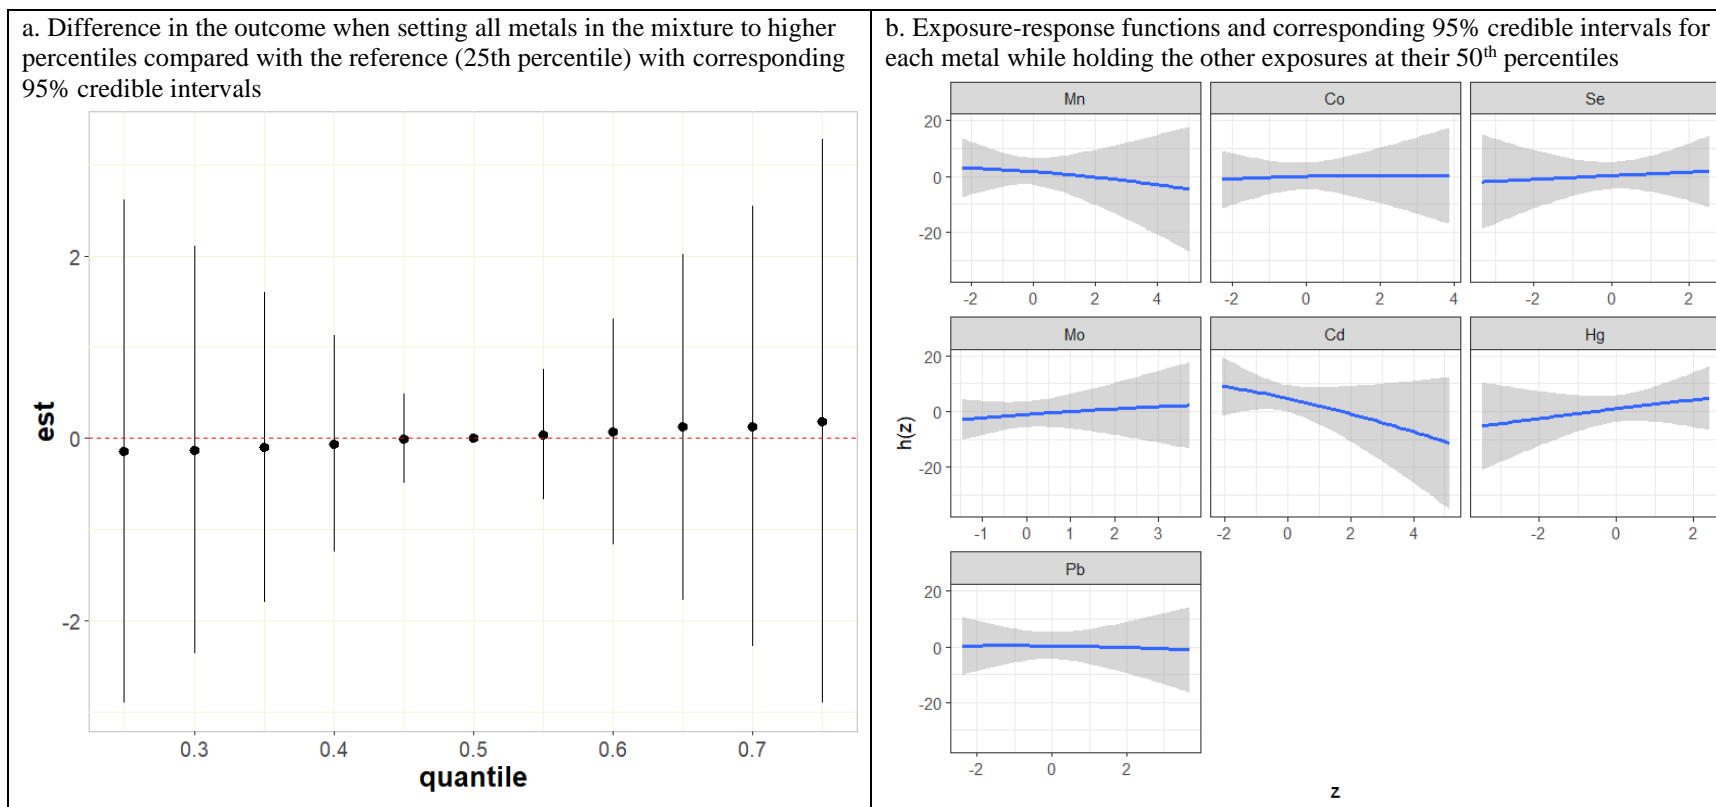

c. Exposure-response function for each metal exposure (column) with the second exposure (row) fixed at its 10th, 50th, and 90th percentiles, while holding the other exposures at their 50th percentiles

$h(\text{expos1} \mid \text{quantiles of expos2})$

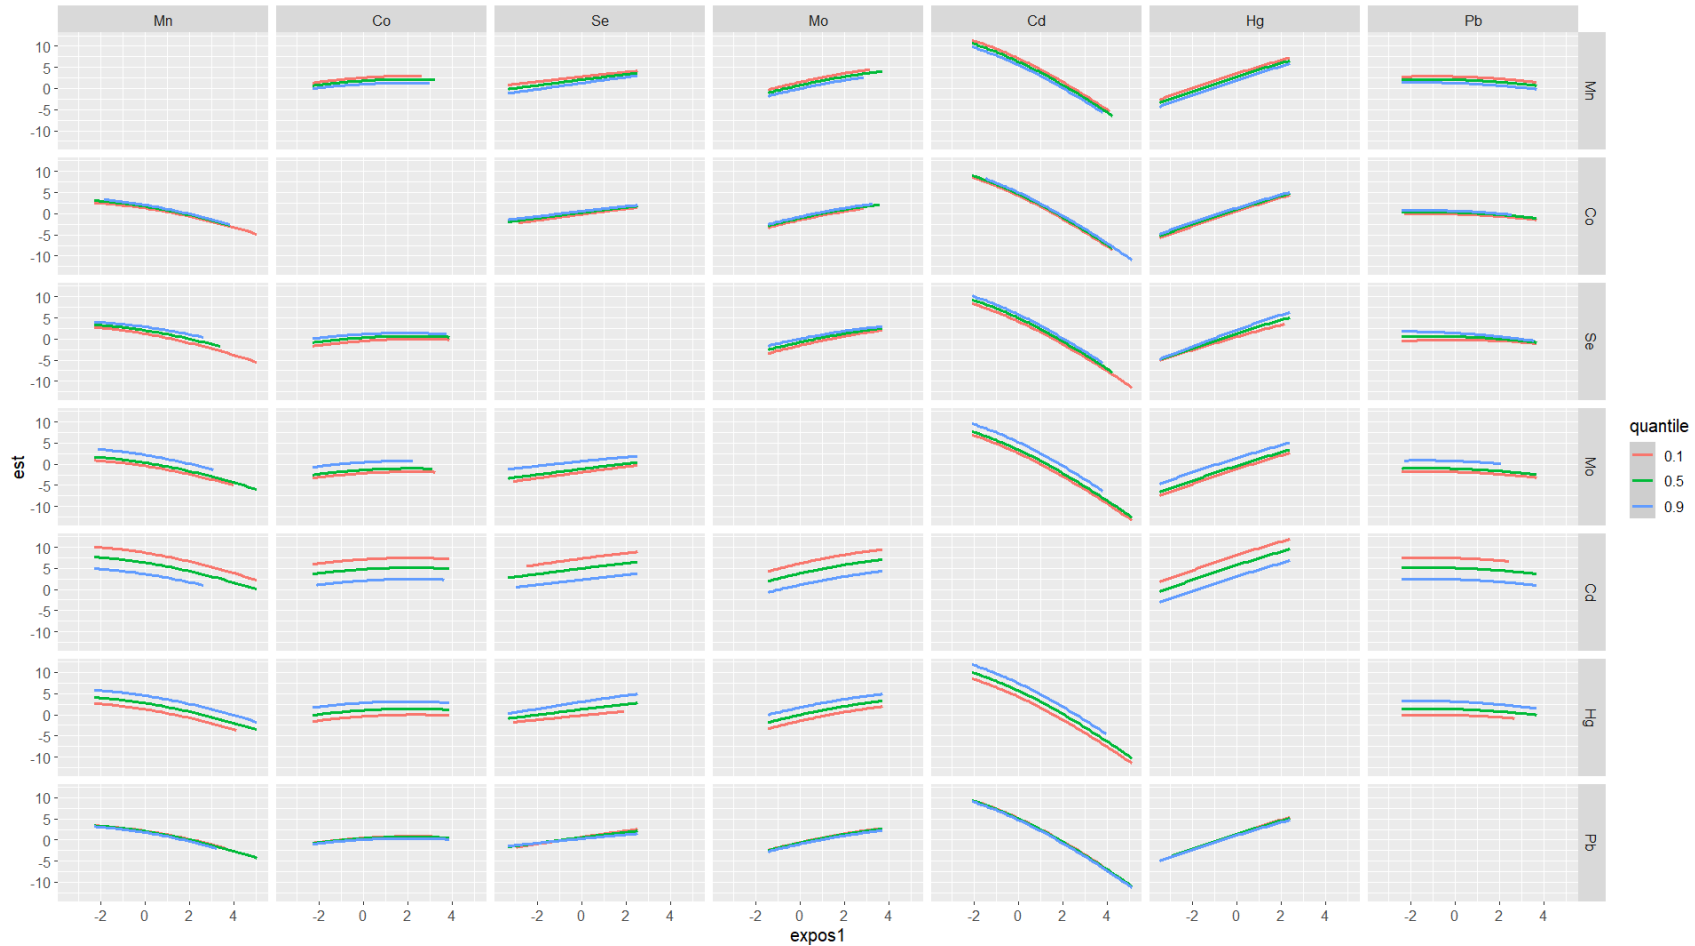

Abbreviations: Mn, manganese; Co, cobalt; Se, selenium; Mo, molybdenum; Cd, cadmium; Hg, mercury; Pb, lead. All models were adjusted for maternal education, child sex, and child fish/seafood intake at 4 years of age.
